# Supplementary material
Source: publisher figshare collection journal article supplement (https://acs.figshare.com/ndownloader/files/10601836)

Supporting Information for

**Diastereo- and Enantioselective Formal [3+2] Cycloaddition of  
Cyclopropyl Ketones and Alkenes via Ti-catalyzed Radical Redox Relay**

Wei Hao, Johannes H. Harenberg, Xiangyu Wu, Samantha N. MacMillan, Song Lin\*

**Table of Contents**

|            |                                                                                              |    |
|------------|----------------------------------------------------------------------------------------------|----|
| Section 1. | General information.....                                                                     | 2  |
| Section 2. | General procedures for Ti-catalyzed [3+2] cycloaddition and product<br>characterization..... | 3  |
| Section 3. | Preparation and characterization of catalysts and substrates.....                            | 16 |
| Section 4. | Mechanistic studies.....                                                                     | 18 |
| Section 5. | X-ray crystallographic data.....                                                             | 21 |
| Section 6. | References.....                                                                              | 24 |
| Section 7. | Spectral data for products.....                                                              | 25 |

## Section 1. General information

All reactions were conducted under a nitrogen atmosphere, unless otherwise noted. Flash chromatography was performed using silica gel 60(230-400 mesh) from SiliCycle. Commercial reagents were purchased from Sigma-Aldrich, Alfa Aesar, Acros, TCI, AK Scientific, and Oakwood and used as received with the following exceptions: toluene, dichloromethane, tetrahydrofuran, diethyl ether, and acetonitrile were dried by passing through columns of activated alumina; dimethylformamide was dried by passing through columns of activated molecular sieves. Triethylamine, ethyl acetate and 1,2-dichloroethane were distilled from CaH<sub>2</sub> at 760 torr. Mn powder used in this study was purchased from Alfa Aesar (catalog #10238, ~325 mesh, 99.3% metal basis, apparent density 2.6-3.5 g/cm). Proton nuclear magnetic resonance (<sup>1</sup>H NMR) spectra and carbon nuclear magnetic resonance (<sup>13</sup>C NMR) spectra were recorded on Mercury-300 (300 MHz), Inova-400 (400 MHz), Inova-500 (500 MHz) and Inova-600 (600M) spectrometers. Chemical shifts for protons are referenced to residual protium in the NMR solvent (CHCl<sub>3</sub> =  $\delta$  7.26). Chemical shifts for carbon are referenced to the carbon resonances of the solvent (CDCl<sub>3</sub> =  $\delta$  77.0). Data are represented as follows: chemical shift, multiplicity (br. s = broad, s= singlet, d = doublet, t = triplet, q = quartet, m = multiplet), coupling constants in Hertz (Hz), integration. Yields determined with <sup>1</sup>H NMR used 1,3,5-trimethylbenzene as the internal standard. Infrared (IR) spectra were obtained using a Bruker Hyperion Tensor 27 FTIR spectrometer. The mass spectral data were obtained on a Thermo Fisher Scientific Exactive series DART Mass Spectrometer. Enantiomeric excesses were determined by chiral HPLC of isolated material using a SHIMADZU system with CHIRALPAK® columns and. Optical rotations were measured using a PERKIN-ELMER polarimeter at room temperature in CHCl<sub>3</sub>.

**Abbreviations:** <sup>t</sup>Bu—*tert*-butyl, DMAP—4-dimethylaminopyridine, DCM—dichloromethane, EtOAc—ethyl acetate, MeCN—acetonitrile, Et<sub>3</sub>N—triethylamine, TEMPO—(2,2,6,6-tetramethylpiperidin-1-yl)oxyl, THF—tetrahydrofuran, Ts—*p*-toluenesulfonyl.



## Section 2. General procedures for Ti-catalyzed [3+2] cycloaddition and product characterization

**Method A.** Substrate scope (0.1 mmol scale): In a N<sub>2</sub>-filled glovebox, an oven-dried 1.5 dr vial equipped with a magnetic stir bar was charged with Mn (11 mg, 0.2 mmol, 2.0 equiv), Et<sub>3</sub>N·HCl (27.4 mg, 0.2 mmol, 2.0 equiv) and **3** (8.3 mg, 0.01 mmol, 10 mol %) in 1 mL of EtOAc. The mixture was stirred vigorously for 10 min to allow reduction of the pre-catalyst (Figure S1). Subsequently, the alkene substrate (0.12 mmol, 1.2 equiv) and cyclopropyl ketones (0.10 mmol, 1 equiv) were added, and the resulting mixture was removed from the glovebox and stirred at room temperature (22 ± 1 °C) for 12 h. The reaction mixture was then transferred onto a short Celite column (1-1.5 cm in length, ca. 0.5 g) and flushed through with a mixture of hexanes and ethyl acetate (3:2, 5 mL in total) to remove the inorganic salts and other insoluble solids. The product solution was concentration in vacuo and dissolved in CDCl<sub>3</sub> to analyze the dr using <sup>1</sup>H NMR. The pure final product was obtained using flash chromatography on silica gel (5-6 cm in length, ca. 1.5 g).

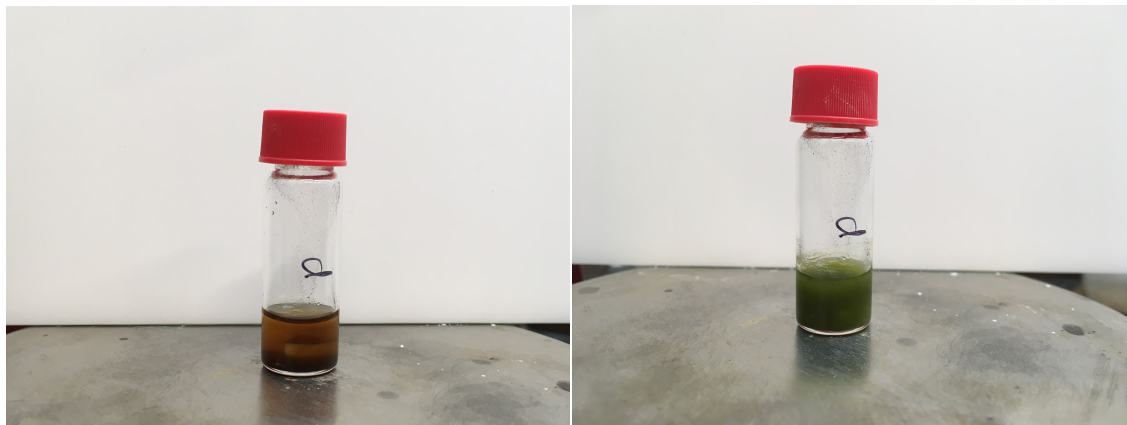

**Figure S1.** Preactivation of the catalyst. Left: before preactivation, showing red color from catalyst **3**. Right: after preactivation, showing green color of the Ti<sup>III</sup> active catalyst.

**Method B.** Scale-up synthesis (1 mmol scale): In a N<sub>2</sub>-filled glovebox, an oven-dried 20 mL scintillation vial equipped with a magnetic stir bar was charged with Mn (110 mg, 2.0 mmol, 2.0 equiv), Et<sub>3</sub>N·HCl (274 mg, 2 mmol, 2.0 equiv) and **3** (42 mg, 0.025 mmol, 2.5 mol %) and EtOAc (10 mL). The mixture was stirred vigorously for 10 min to allow reduction of the pre-catalyst. Subsequently, 3-vinyl-*N*-tosylindole (312 mg, 1.05 mmol, 1.05 equiv) and cyclopropyl ketones **1** (174 mg, 1.0 mmol, 1 equiv) were added, and the resulting mixture stirred at room temperature (22 ± 1 °C) for 60 h. The reaction mixture was then transferred onto a short Celite column (1-1.5 cm in length, ca. 0.5 g) and flushed through with a mixture of hexanes and ethyl acetate (3:2, 5 mL in total) to remove the inorganic salts and other insoluble solids. The product solution was concentration in vacuo and dissolved in CDCl<sub>3</sub> to analyze the dr using <sup>1</sup>H NMR. The pure final product was obtained using flash chromatography on silica gel (10 cm in length, ca. 5 g) to obtain the final product **15** (391 mg, 83% yield) as effectively a single diastereomer (dr > 19:1) in 92% ee.

**Method C.** Low temperature procedure (0.1 mmol scale): In a N<sub>2</sub>-filled glovebox, an oven-dried 1.5 dr vial equipped with a magnetic stir bar was charged with Zn (11 mg, 0.2 mmol, 2.0 equiv), Et<sub>3</sub>N·HCl (27.4 mg, 0.2 mmol, 2.0 equiv) and **3** (8.3 mg, 0.01 mmol, 10 mol %) in 1 mL of EtOAc. The mixture was stirred vigorously at room temperature for 10 min to allow reduction of the pre-catalyst. Then keep this solution under low temperature (in a cold well cooled with isopropanol/dry ice) for 5 min. Subsequently, the alkene substrate (0.12 mmol, 1.2 equiv) and cyclopropyl ketones (0.10 mmol, 1 equiv) were added, and the resulting mixture was removed from the glovebox and stirred at low temperature for 48-50 h. The reaction mixture was then transferred onto a short Celite column (1-1.5 cm in length, ca. 0.5 g) and flushed through with a mixture of hexanes and ethyl acetate (3:2, 5 mL in total) to remove the inorganic salts and other insoluble solids. The product solution was concentration in vacuo and dissolved in CDCl<sub>3</sub> to analyze the dr using <sup>1</sup>H NMR. The pure final product was obtained using flash chromatography on silica gel (5-6 cm in length, ca. 1.5 g) to obtained the final product.

\*Although all data presented in this work were set up in a glovebox, we have also tested the reaction with standard Schlenk technique using a Schlenk tube as the reaction vessel under air-free conditions and obtained comparable results.

**((1*S*,2*S*)-4,4-dimethyl-2-phenylcyclopentyl)(phenyl)methanone (**2**).** Followed Method

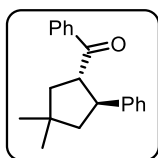

A, the crude product was purified by column chromatography (1:9, EtOAc/hexanes) to give 27.2 mg (98% yield) of **2** as a white solid. The dr was determined to be >19:1. trans diastereoisomer: 97% ee [AS, hexanes, 0.5 mL/min, 223 nm; t<sub>1</sub> = 13.95 min, t<sub>2</sub> = 15.24 min]. [α]<sub>D</sub><sup>22</sup> 0.167 (c0.28, CHCl<sub>3</sub>). IR (Film): 3058, 3029, 2945, 2924, 2861, 1678, 1598, 1559, 1495, 1447, 1364, 1350, 1282, 1246, 1224, 1204, 1182, 1028, 927, 832, 752, 701; <sup>1</sup>H NMR (500 MHz, CDCl<sub>3</sub>) δ 7.85 (dd, *J* = 8.3, 1.2 Hz, 2H), 7.53 – 7.50 (m, 1H), 7.41 (t, *J* = 7.7 Hz, 2H), 7.30-7.24 (m, 4H), 7.17-7.14 (m, 1H), 4.02– 3.94 (m, 2H), 2.15 (dd, *J* = 13.0, 9.5 Hz, 1H), 2.07 (dd, *J* = 12.8, 7.1 Hz, 1H), 1.91-1.86(m, 1H), 1.79-1.74 (m, 1H), 1.24 (s, 3H), 1.17 (s, 3H). <sup>13</sup>C NMR (126 MHz, CDCl<sub>3</sub>) δ 201.71, 144.04, 136.97, 132.76, 128.40, 128.39, 128.34, 127.35, 126.12, 54.84, 49.39, 46.77, 46.73, 38.98, 30.56, 29.51; MS (DART) exact mass calculated for [C<sub>20</sub>H<sub>23</sub>O]: 279.1743, found 279.1751. The characterization data are consistent with literature report.<sup>[1]</sup>

**((1*S*,2*S*)-2-(4-chlorophenyl)-4,4-dimethylcyclopentyl)(phenyl)methanone (**8**).**

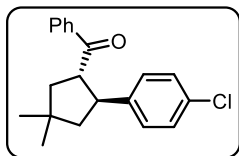

Followed Method A with 5% of catalyst **3**, the crude product was purified by column chromatography (1:9, EtOAc/hexanes) to give 23.4 mg (75% yield) of **8** as a white solid. The dr was determined to be 12:1 trans/cis. trans diastereoisomer: 96% ee [AD, 0.5% iPrOH in hexanes, 1.0 mL/min, 223 nm; t<sub>1</sub> = 7.53 min, t<sub>2</sub> = 12.71 min]. [α]<sub>D</sub><sup>22</sup> 0.344 (c0.54, CHCl<sub>3</sub>). IR (Film): 3083, 3062, 2957, 2927, 2863, 1670, 1596, 1579, 1494, 1446, 1364, 1291, 1242, 1223, 1205, 1180, 1089, 1074, 1012, 836, 825, 793, 758, 701, 663; <sup>1</sup>H NMR (500 MHz, CDCl<sub>3</sub>) δ 7.83 (dd, *J* = 8.3, 1.1 Hz, 2H), 7.53-7.49 (m, 1H), 7.42-7.38 (m, 2H), 7.19 (s, 4H), 3.97-3.84 (m, 2H), 2.13 (dd, *J* = 13.0, 9.9 Hz, 1H), 2.02 (dd, *J* = 12.7, 7.4 Hz, 1H), 1.81 (dd, *J* = 12.6, 11.7 Hz, 1H), 1.71 (dd, *J* = 13.0, 8.2

Hz, 1H), 1.21 (s, 3H), 1.13 (s, 3H).  $^{13}\text{C}$  NMR (126 MHz,  $\text{CDCl}_3$ )  $\delta$  201.38, 142.48, 136.80, 132.94, 131.74, 128.72, 128.49, 128.42, 128.36, 54.90, 49.21, 46.70, 46.00, 38.94, 30.56, 29.53; MS (DART) exact mass calculated for  $[\text{C}_{20}\text{H}_{22}\text{ClO}]$ : 313.1354, found 313.1361.

**((1*S*,2*S*)-4,4-dimethyl-2-(4-(4,4,5,5-tetramethyl-1,3,2-dioxaborolan-2-**

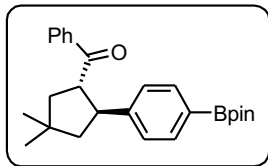

**yl)phenyl)cyclopentyl)(phenyl)methanone (9).** Followed Method C, at  $-25\text{ }^\circ\text{C}$ , the crude product was purified by column chromatography (1:9, EtOAc/hexanes) to give 36.8 mg (91% yield) of **9** as a white solid. The dr was determined to be >19:1 dr. trans diastereoisomer: 97% ee [OD, 0.5% iPrOH in hexanes, 1.0 mL/min, 223 nm;  $t_1 = 8.21$  min,  $t_2 = 9.53$  min].  $[\alpha]_{\text{D}}^{22}$  0.610 ( $c_{1.23}$ ,  $\text{CHCl}_3$ ). IR (Film): 2980, 2952, 2929, 2864, 1676, 1610, 1447, 1398, 1358, 1321, 1270, 1213, 1202, 1141, 1089, 1013, 962, 859, 927, 757, 707, 676, 637;  $^1\text{H}$  NMR (500 MHz,  $\text{CDCl}_3$ )  $\delta$  7.80 – 7.78 (m, 2H), 7.66 (d,  $J = 8.0$  Hz, 2H), 7.45 (t,  $J = 7.4$  Hz, 1H), 7.35 (t,  $J = 7.7$  Hz, 2H), 7.26 – 7.23 (m, 2H), 3.99–3.89 (m, 2H), 2.10 (dd,  $J = 13.0, 9.5$  Hz, 1H), 2.00 (dd,  $J = 12.3, 7.2$  Hz, 1H), 1.83 (t,  $J = 11.9$  Hz, 1H), 1.70 (dd,  $J = 12.7, 7.6$  Hz, 1H), 1.28 (s, 12H), 1.18 (s, 3H), 1.11 (s, 3H).  $^{13}\text{C}$  NMR (126 MHz,  $\text{CDCl}_3$ )  $\delta$  201.61, 147.47, 136.93, 134.91, 132.76, 128.40, 128.35, 126.82, 83.59, 54.71, 49.32, 46.95, 46.76, 39.09, 30.50, 29.47, 24.82, 24.79. MS (DART) exact mass calculated for  $[\text{C}_{26}\text{H}_{34}\text{BO}_3]$ : 405.2596, found 405.2609.

**4-((1*S*,2*S*)-2-benzoyl-4,4-dimethylcyclopentyl)benzonitrile (10).** Followed Method C,

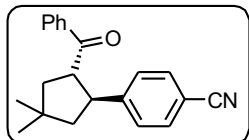

at  $-25\text{ }^\circ\text{C}$ , the crude product was purified by column chromatography (1:9, EtOAc/hexanes) to give 16.1 mg (53% yield) of **10** as a yellow solid. The dr was determined to be >19:1. trans diastereoisomer: 89% ee [AD, 5% iPrOH in hexanes, 1.0 mL/min, 223 nm;  $t_1 = 6.40$  min,  $t_2 = 9.75$  min].  $[\alpha]_{\text{D}}^{22}$  0.499 ( $c_{0.97}$ ,  $\text{CHCl}_3$ ). IR (Film): 2952, 2865, 2226, 1678, 1608, 1596, 1580, 1504, 1463, 1447, 1360, 1319, 1272, 1248, 1205, 1178, 1159, 1090, 1013, 896, 858, 754, 699, 658;  $^1\text{H}$  NMR (500 MHz,  $\text{CDCl}_3$ )  $\delta$  7.84 (d,  $J = 7.2$  Hz, 2H), 7.52 (d,  $J = 8.4$  Hz, 3H), 7.41 (t,  $J = 7.7$  Hz, 2H), 7.37 (d,  $J = 8.2$  Hz, 2H), 4.04 (dd,  $J = 18.4, 10.8$  Hz, 1H), 3.92 – 3.86 (m, 1H), 2.17 (dd,  $J = 13.1, 10.2$  Hz, 1H), 2.05 (dd,  $J = 12.6, 7.5$  Hz, 1H), 1.83 (t,  $J = 12.2$  Hz, 1H), 1.72 (dd,  $J = 13.1, 8.3$  Hz, 1H), 1.23 (s, 3H), 1.13 (s, 3H).  $^{13}\text{C}$  NMR (126 MHz,  $\text{CDCl}_3$ )  $\delta$  200.79, 149.74, 136.48, 133.15, 132.20, 128.58, 128.37, 128.23, 118.99, 109.95, 54.74, 48.84, 46.67, 46.35, 39.10, 30.47, 29.45. MS (DART) exact mass calculated for  $[\text{C}_{21}\text{H}_{22}\text{NO}]$ : 304.1696, found 304.1704.

**((1*S*,2*S*)-2-(4-fluorophenyl)-4,4-dimethylcyclopentyl)(phenyl)methanone (11).**

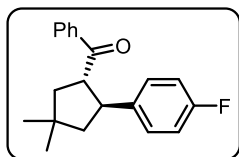

Followed Method A, the crude product was purified by column chromatography (1:9, EtOAc/hexanes) to give 25.2 mg (85% yield) of **11** as a yellow solid. The dr was determined to be 12:1 trans/cis. trans diastereoisomer: 94% ee [AS, hexanes, 0.3 mL/min, 223 nm;  $t_1 = 24.23$  min,  $t_2 = 26.05$  min].  $[\alpha]_{\text{D}}^{22}$  0.538 ( $c_{0.91}$ ,  $\text{CHCl}_3$ ). IR (Film): 2952, 2929, 2864, 1676, 1597, 1580, 1509, 1447, 1366, 1285, 1222, 1158, 1014, 832, 792, 699, 661;  $^1\text{H}$  NMR (500 MHz,  $\text{CDCl}_3$ )  $\delta$  7.83 (dd,  $J = 8.3, 1.2$  Hz, 2H), 7.52–7.49 (m, 1H), 7.41–7.38 (m, 2H), 7.23–7.20 (m, 2H), 6.91 (t,  $J = 8.7$  Hz, 2H), 3.97–3.85 (m, 2H), 2.12 (dd,  $J = 13.0, 9.8$  Hz, 1H), 2.02 (dd,  $J = 12.9, 7.1$  Hz, 1H), 1.84–1.79 (m, 1H), 1.72

(dd,  $J = 12.8, 8.4$  Hz, 1H), 1.22 (s, 3H), 1.13 (s, 3H).  $^{13}\text{C}$  NMR (126 MHz,  $\text{CDCl}_3$ )  $\delta$  201.55, 162.27, 160.33, 139.58 (d,  $J = 3.2$  Hz), 136.88, 132.88, 128.70 (d,  $J = 7.8$  Hz), 128.41 (d,  $J = 13.0$  Hz), 115.05 (d,  $J = 21.0$  Hz), 55.04, 49.41, 46.66, 46.01, 38.86, 30.60, 29.56. MS (DART) exact mass calculated for  $[\text{C}_{20}\text{H}_{22}\text{FO}]$ : 297.1649, found 297.1659.

**((1*S*,2*S*)-2-(4-methoxyphenyl)-4,4-dimethylcyclopentyl)(phenyl)methanone (12).**

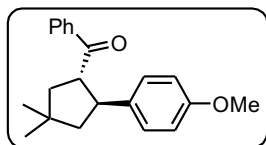

Followed Method A, the crude product was purified by column chromatography (1:9, EtOAc/hexanes) to give 27.4 mg (89% yield) of **12** as a white solid. The dr was determined to be >19:1. trans diastereoisomer: 96% ee [AD, 0.5% iPrOH in hexanes, 1.0 mL/min, 223 nm;  $t_1 = 10.77$  min,  $t_2 = 23.35$  min].  $[\alpha]_{\text{D}}^{22}$  0.982 (c1.91,  $\text{CHCl}_3$ ). IR (Film): 2950, 2932, 2863, 2834, 1677, 1611, 1580, 1512, 1462, 1447, 1365, 1282, 1244, 1204, 1177, 1035, 1012, 827, 775, 699, 659;  $^1\text{H}$  NMR (500 MHz,  $\text{CDCl}_3$ )  $\delta$  7.84-7.82 (m, 2H), 7.51-7.47 (m, 1H), 7.40-7.37 (m, 2H), 7.18 (d,  $J = 8.7$  Hz, 2H), 6.78 (d,  $J = 8.7$  Hz, 2H), 3.94-3.86 (m, 2H), 3.74 (s, 3H), 2.10 (dd,  $J = 13.0, 9.4$  Hz, 1H), 2.01 (dd,  $J = 12.7, 6.7$  Hz, 1H), 1.85-1.80 (m, 1H), 1.73 (dd,  $J = 12.8, 7.5$  Hz, 1H), 1.21 (s, 3H), 1.14 (s, 3H).  $^{13}\text{C}$  NMR (126 MHz,  $\text{CDCl}_3$ )  $\delta$  201.88, 157.89, 137.03, 136.05, 132.72, 128.38, 128.37, 128.23, 113.72, 55.19, 55.03, 49.49, 46.69, 46.11, 38.81, 30.62, 29.58. MS (DART) exact mass calculated for  $[\text{C}_{21}\text{H}_{25}\text{O}_2]$ : 309.1849, found 309.8157.

**((1*S*,2*S*)-4,4-dimethyl-2-(naphthalen-2-yl)cyclopentyl)(phenyl)methanone (13).**

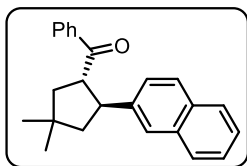

Followed Method A, the crude product was purified by column chromatography (1:9, EtOAc/hexanes) to give 30.2 mg (92% yield) of **13** as a white solid. The dr was determined to be >19:1. trans diastereoisomer: 94% ee [IA, 2.0% iPrOH in hexanes, 1.0 mL/min, 223 nm;  $t_1 = 7.47$  min,  $t_2 = 11.99$  min].  $[\alpha]_{\text{D}}^{22}$  0.46 (c0.97,  $\text{CHCl}_3$ ). IR (Film): 3057, 3021, 2948, 2928, 2862, 1670, 1598, 1579, 1508, 1447, 1363, 1298, 1242, 1212, 1022, 1002, 902, 865, 828, 746, 700;  $^1\text{H}$  NMR (500 MHz,  $\text{CDCl}_3$ )  $\delta$  7.85 (dd,  $J = 8.4, 1.3$  Hz, 2H), 7.75 (t,  $J = 7.9$  Hz, 3H), 7.70 (d,  $J = 1.7$  Hz, 1H), 7.49-7.35 (m, 6H), 4.20-4.14 (m, 1H), 4.09-4.03 (m, 1H), 2.19 (dd,  $J = 13.0, 10.1$  Hz, 1H), 2.12 (dd,  $J = 12.8, 7.4$  Hz, 1H), 2.02-1.97 (m, 1H), 1.79 (dd,  $J = 13.3, 8.4$  Hz, 1H), 1.27 (s, 3H), 1.19 (s, 3H).  $^{13}\text{C}$  NMR (126 MHz,  $\text{CDCl}_3$ )  $\delta$  201.69, 141.44, 136.94, 133.44, 132.78, 132.16, 128.40, 128.37, 127.99, 127.58, 127.45, 125.93, 125.82, 125.67, 125.19, 54.78, 49.35, 46.83, 39.12, 30.57, 29.52. MS (DART) exact mass calculated for  $[\text{C}_{24}\text{H}_{25}\text{O}]$ : 329.1900, found 329.1912.

**((1*S*,2*S*)-4,4-dimethyl-2-(pyridin-4-yl)cyclopentyl)(phenyl)methanone (14).**

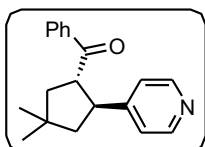

Followed Method A, the crude product was purified by column chromatography (2:3, EtOAc/hexanes) to give 24.3 mg (87% yield) of **14** as a yellow solid. The dr was determined to be >19:1. trans diastereoisomer: 79% ee [IA, 12% iPrOH in hexanes, 1.2 mL/min, 223 nm;  $t_1 = 7.29$  min,  $t_2 = 13.45$  min].  $[\alpha]_{\text{D}}^{22}$  0.010 (c0.49,  $\text{CHCl}_3$ ). IR (Film): 3057, 3025, 2952, 2865, 1680, 1597, 1580, 1448, 1366, 1251, 1208, 1013, 818, 748, 702;  $^1\text{H}$  NMR (500 MHz,  $\text{CDCl}_3$ )  $\delta$  8.43 (d,  $J = 6.1$  Hz, 2H), 7.86 (d,  $J = 7.1$  Hz, 2H), 7.53 (t,  $J = 7.4$  Hz, 1H), 7.42 (t,  $J = 7.8$  Hz, 2H), 7.16 (d,  $J = 6.2$  Hz, 2H), 3.99 (dd,  $J = 18.2, 10.6$  Hz, 1H), 3.93-3.87 (m, 1H), 2.16 (dd,  $J = 13.1, 10.1$  Hz, 1H), 2.05 (ddd,  $J = 12.7, 7.5, 1.0$  Hz, 1H), 1.83

(t,  $J = 12.1$  Hz, 1H), 1.72 (ddd,  $J = 13.0, 8.2, 1.0$  Hz, 1H), 1.22 (s, 3H), 1.13 (s, 3H).  $^{13}\text{C}$  NMR (126 MHz,  $\text{CDCl}_3$ )  $\delta$  200.82, 153.06, 149.77, 136.50, 133.12, 128.58, 128.38, 122.72, 54.20, 48.26, 46.68, 45.42, 39.16, 30.37, 29.36. MS (DART) exact mass calculated for  $[\text{C}_{19}\text{H}_{22}\text{NO}]$ : 280.1696, found 280.1698.

**((1*S*,2*S*)-4,4-dimethyl-2-(1-tosyl-1*H*-indol-3-yl)cyclopentyl)(phenyl)methanone (15).**

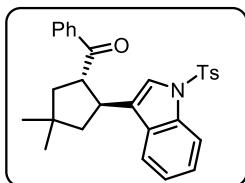

Followed Method A, the crude product was purified by column chromatography (1:5, EtOAc/hexanes) to give 42.9 mg (91% yield) of **15** as a white solid. The dr was determined to be >19:1. trans diastereoisomer: 98% ee [AD, 6.0% iPrOH in hexanes, 1.0 mL/min, 223 nm;  $t_1 = 6.74$  min,  $t_2 = 10.01$  min].  $[\alpha]_{\text{D}}^{22}$  0.509 (c1.98,  $\text{CHCl}_3$ ). IR (Film): 2952, 2933, 2866, 1677, 1597, 1580, 1447, 1367, 1306, 1280, 1253, 1207, 1187, 1173, 1124, 1095, 1019, 977, 909, 812, 745, 733, 703, 676;  $^1\text{H}$  NMR (500 MHz,  $\text{CDCl}_3$ )  $\delta$  7.89 (d,  $J = 8.3$  Hz, 1H), 7.84 (dd,  $J = 8.3, 1.1$  Hz, 2H), 7.62 (d,  $J = 8.4$  Hz, 2H), 7.55 (d,  $J = 7.9$  Hz, 1H), 7.52-7.49 (m, 1H), 7.38 (t,  $J = 7.8$  Hz, 2H), 7.34 (s, 1H), 7.23 (d,  $J = 8.3$  Hz, 1H), 7.18-7.15 (m, 1H), 7.12 (d,  $J = 8.0$  Hz, 2H), 4.19-4.13 (m, 1H), 4.05-4.00 (m, 1H), 2.30 (s, 3H), 2.18 – 2.08 (m, 2H), 1.92-1.87 (m, 1H), 1.75 (dd,  $J = 13.0, 7.9$  Hz, 1H), 1.21 (s, 3H), 1.15 (s, 3H).  $^{13}\text{C}$  NMR (126 MHz,  $\text{CDCl}_3$ )  $\delta$  201.73, 144.60, 136.84, 135.45, 135.13, 132.94, 130.53, 129.71, 128.49, 128.35, 126.66, 126.25, 124.55, 122.99, 121.87, 120.39, 113.61, 53.09, 48.03, 46.65, 39.43, 37.67, 30.39, 29.17, 21.52. MS (DART) exact mass calculated for  $[\text{C}_{29}\text{H}_{30}\text{NO}_3\text{S}]$ : 472.1941, found 472.1958.

**((1*S*,2*S*)-4,4-dimethyl-2-phenylcyclopentyl)(1-methyl-1*H*-imidazol-2-yl)methanone (16).**

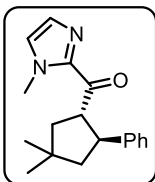

Followed Method A, the crude product was purified by column chromatography (1:9, EtOAc/Hexanes) to give 25.9 mg (92% yield) of **16** as a white solid. The dr was determined to be 6:1 trans/cis. trans diastereoisomer: 88% ee [IA, 0.5% iPrOH in hexanes, 1.0 mL/min, 223 nm;  $t_1 = 19.15$  min,  $t_2 = 22.66$  min].  $[\alpha]_{\text{D}}^{22}$  0.801 (c2.49,  $\text{CHCl}_3$ ). IR (Film): 3028, 2951, 2865, 1669, 1494, 1462, 1406, 1365, 1289, 1222, 1154, 1078, 1019, 906, 890, 821, 760, 689;  $^1\text{H}$  NMR (500 MHz,  $\text{CDCl}_3$ )  $\delta$  7.31-7.29 (m, 2H), 7.22 (t,  $J = 7.7$  Hz, 2H), 7.13-7.09 (m, 2H), 6.94 (s, 1H), 4.49-4.43 (m, 1H), 3.93 (s, 3H), 3.83 (dd,  $J = 22.6, 7.5$  Hz, 1H), 2.25 (dd,  $J = 12.9, 9.7$  Hz, 1H), 2.01 (dd,  $J = 12.6, 7.5$  Hz, 1H), 1.78 (t,  $J = 12.3$  Hz, 1H), 1.66 (dd,  $J = 12.9, 9.2$  Hz, 1H), 1.20 (s, 3H), 1.14 (s, 3H).  $^{13}\text{C}$  NMR (126 MHz,  $\text{CDCl}_3$ )  $\delta$  194.24, 143.71, 143.14, 129.02, 128.23, 127.46, 126.85, 125.99, 54.28, 50.33, 47.05, 46.69, 38.48, 36.16, 30.69, 30.21. MS (DART) exact mass calculated for  $[\text{C}_{20}\text{H}_{23}\text{N}_2\text{O}]$ : 283.1805, found 283.1814.

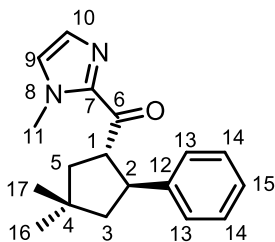

Assignment based on 1D  $^1\text{H}$  supported by COSY. Major product assigned as trans based on: ROE between H1, H3' (top), H5' (top), and Me17 defines "top". ROE from H2, H3'' (bottom), and H5'' (bottom) to Me16 gives "bottom".

**(8*R*,9*S*,13*S*,14*S*)-3-((1*S*,2*S*)-2-benzoyl-4,4-dimethylcyclopentyl)-13-methyl-6,7,8,9,11,12,13,14,15,16-decahydro-17*H*-cyclopenta[*a*]phenanthren-17-one (17).**

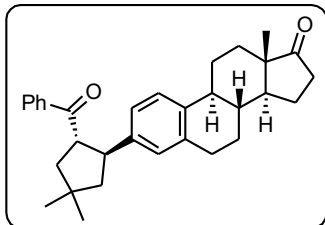

Followed Method A, the crude product was purified by column chromatography (1:5, EtOAc/hexanes) to give 41.8 mg (92% yield) of **17** as a white solid. The dr was determined to be >19:1 trans/cis. trans diastereoisomer: 95% de [AD, 3.0% iPrOH in hexanes, 1.0 mL/min, 223 nm;  $t_1$  = 8.11 min,  $t_2$  = 9.65 min].  $[\alpha]_{\text{D}}^{22}$  0.322 (c0.32,  $\text{CHCl}_3$ ). IR (Film): 2930, 2864, 1738, 1681, 1490, 1448, 1369, 1254, 1207, 1083, 1053, 1038, 1008, 822, 757, 702;  $^1\text{H}$  NMR (500 MHz,  $\text{CDCl}_3$ )  $\delta$  7.86 (dd,  $J$  = 8.4, 1.4 Hz, 2H), 7.50 (t,  $J$  = 7.4 Hz, 1H), 7.40 (t,  $J$  = 7.7 Hz, 2H), 7.17 (dd,  $J$  = 8.1, 1.0 Hz, 1H), 7.07 (dd,  $J$  = 8.1, 2.0 Hz, 1H), 6.98 (d,  $J$  = 1.9 Hz, 1H), 3.98-3.88 (m, 2H), 2.84 (dd,  $J$  = 9.9, 4.9 Hz, 2H), 2.51-2.46 (m, 1H), 2.39-2.35 (m, 1H), 2.24-2.21 (m, 1H), 2.16-2.11 (m, 2H), 2.06-1.92 (m, 4H), 1.86 – 1.81 (m, 1H), 1.69 (dd,  $J$  = 13.3, 7.6 Hz, 1H), 1.63-1.56 (m, 2H), 1.51-1.36 (m, 4H), 1.21 (s, 3H), 1.11 (s, 3H), 0.88 (s, 3H).  $^{13}\text{C}$  NMR (126 MHz,  $\text{CDCl}_3$ )  $\delta$  201.58, 141.56, 137.48, 136.97, 136.26, 132.72, 128.44, 128.38, 128.28, 125.35, 124.55, 54.74, 50.48, 49.46, 47.98, 46.81, 45.83, 44.28, 38.98, 38.15, 35.84, 31.57, 30.53, 29.45, 29.38, 26.52, 25.64, 21.55, 13.82. MS (DART) exact mass calculated for  $[\text{C}_{32}\text{H}_{39}\text{O}_2]$ : 455.2945, found 455.2957.

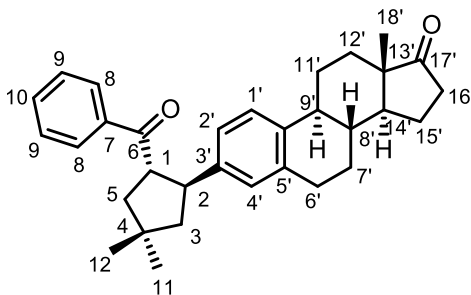

Assignments were based on 1D  $^1\text{H}$  supported by COSY and HSQC. Major product trans: ROE from H1, H3' (top), H5' (top) to H12 defines "top". ROE from H11 to H3'' (bottom), H5'' (bottom) and H2 defines "bottom" and shows that H2 is trans to H1.

**phenyl((1*S*,2*S*)-2,4,4-trimethyl-2-phenylcyclopentyl)methanone (19).**

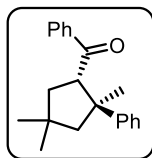

Followed Method A, the crude product was purified by column chromatography (1:9, EtOAc/hexanes) to give 28.0 mg (96% yield) of **19** as a yellow oil. The dr was determined to be >19:1. trans diastereoisomer: 96% ee [AD, 0.5% iPrOH in hexanes, 1.0 mL/min, 223 nm;  $t_1$  = 5.16 min,  $t_2$  = 5.99 min].  $[\alpha]_{\text{D}}^{22}$  0.745 (c2.12,  $\text{CHCl}_3$ ). IR (Film): 057, 3025, 2952, 2867, 1673, 1597, 1580, 1496, 1464, 1446, 1380, 1367, 1311, 1246, 1206, 1180, 1009, 830, 759, 728, 691;  $^1\text{H}$  NMR (500 MHz,  $\text{CDCl}_3$ )  $\delta$  7.47 (dd,  $J$  = 8.4, 1.2 Hz, 2H), 7.39-7.35 (m, 1H), 7.28 – 7.26 (m, 2H), 7.22-7.16 (m, 4H), 7.14-7.11 (m, 1H), 4.20 (dd,  $J$  = 12.4, 6.3 Hz, 1H), 2.45 (t,  $J$  = 12.7 Hz, 1H), 2.30 (d,  $J$  = 13.8 Hz, 1H), 1.92 (d,  $J$  = 13.9 Hz, 1H), 1.81 (dd,  $J$  = 13.1, 6.2 Hz, 1H), 1.39 (s, 3H), 1.29 (d,  $J$  = 1.7 Hz, 6H).  $^{13}\text{C}$  NMR (126 MHz,  $\text{CDCl}_3$ )  $\delta$

201.94, 149.02, 138.04, 132.14, 128.18, 128.09, 127.90, 126.26, 125.72, 58.54, 57.55, 51.09, 44.39, 36.38, 31.91, 31.79, 24.13. MS (DART) exact mass calculated for [C<sub>21</sub>H<sub>25</sub>O]: 293.1900, found 293.1906.

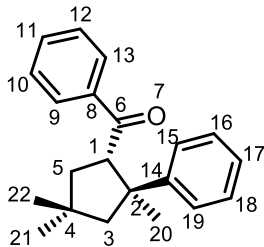

Assignments were based on 1D <sup>1</sup>H supported by COSY and HSQC. Major product trans: ROE from H1, H3' (top), H5' (top) to H22 defines "top". ROE from H20 to H3'' (bottom), H5'' (bottom) and H21 defines "bottom" and shows that H1 is cis to Me20.

**((1*S*,5*S*)-3,3-dimethyl-2',3'-dihydrospiro[cyclopentane-1,1'-inden]-5-**

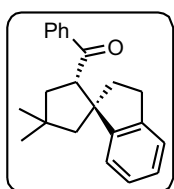

**yl)(phenyl)methanone (20).** Followed Method A, the crude product was purified by column chromatography (1:9, EtOAc/hexanes) to give 24.9 mg (82% yield) of **19** as a yellow oil. The dr was determined to be >19:1 dr. trans diastereoisomer: 96% ee [AD, 0.2% iPrOH in hexanes, 1.0 mL/min, 223 nm; t<sub>1</sub> = 6.09 min, t<sub>2</sub> = 7.07 min]. [α]<sub>D</sub><sup>22</sup> 1.805 (c1.78, CHCl<sub>3</sub>). IR (Film): 2950, 2930, 2863, 1669, 1596, 1580, 1478, 1457, 1447, 1365, 1291, 1244, 1226, 1209, 1026, 1003, 982, 754, 730, 718, 689; <sup>1</sup>H NMR (500 MHz, CDCl<sub>3</sub>) δ 7.43 (d, *J* = 7.6 Hz, 1H), 7.38 (dd, *J* = 8.4, 1.2 Hz, 2H), 7.31-7.28 (m, 1H), 7.25-7.22 (m, 1H), 7.10-7.07 (m, 2H), 7.01 (td, *J* = 7.4, 1.0 Hz, 1H), 6.80 (d, *J* = 7.5 Hz, 1H), 3.97 (dd, *J* = 12.1, 6.4 Hz, 1H), 2.64 (ddd, *J* = 13.0, 7.9, 1.8 Hz, 1H), 2.57 (dd, *J* = 16.5, 9.1 Hz, 1H), 2.43 (t, *J* = 12.6 Hz, 1H), 2.33 (d, *J* = 13.7 Hz, 1H), 2.27-2.20 (m, 1H), 1.88-1.78 (m, 2H), 1.70 (dd, *J* = 13.1, 6.4 Hz, 1H), 1.27 (s, 3H), 1.25 (s, 3H). <sup>13</sup>C NMR (126 MHz, CDCl<sub>3</sub>) δ 201.62, 148.79, 143.78, 137.37, 132.17, 128.00, 127.66, 126.83, 126.45, 124.50, 122.54, 60.66, 57.86, 56.94, 44.43, 36.97, 36.45, 31.50, 31.24, 31.04. MS (DART) exact mass calculated for [C<sub>22</sub>H<sub>25</sub>O]: 305.1900, found 305.1907.

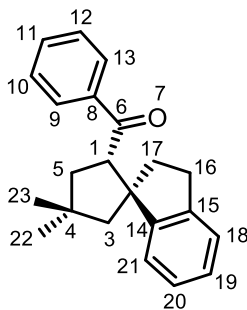

Assignments were based on 1D <sup>1</sup>H supported by COSY and HSQC. Major product trans: ROE from H1, H3' (top), H5' (top) to H23 defines "top". ROE from H22 to H3'' (bottom), H5'' (bottom) and H17'' defines "bottom" and shows that Ph14 is trans to H1.

**((1*S*,5*S*)-3,3-dimethyl-3',4'-dihydro-2'*H*-spiro[cyclopentane-1,1'-naphthalen]-5-**

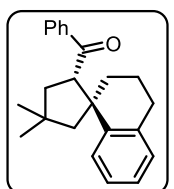

**yl)(phenyl)methanone (20).** Followed Method A, the crude product was purified by column chromatography (1:9, EtOAc/hexanes) to give 25.8 mg (81% yield) of **20** as a yellow oil. The dr was determined to be >19:1.

trans diastereoisomer: 90% ee [AD, 0.5% iPrOH in hexanes, 1.0 mL/min, 223 nm; t<sub>1</sub> = 6.14 min, t<sub>2</sub> = 7.10 min]. [α]<sub>D</sub><sup>22</sup> 1.378 (c3.12, CH<sub>2</sub>Cl<sub>2</sub>). IR (Film): 2949, 2932, 2866, 1671, 1597, 1579, 1488, 1446, 1365, 1314, 1280, 1236, 1205, 1181, 1008, 993, 973, 861, 831, 754, 732, 718, 690; <sup>1</sup>H NMR (500 MHz, CDCl<sub>3</sub>) δ 7.65 (d, *J* = 7.9 Hz, 1H), 7.40 (dd, *J* = 8.4, 1.2 Hz, 2H), 7.30-7.24 (m, 2H), 7.10-7.06 (m, 2H), 7.02-6.99 (m, 1H), 6.77 (d, *J* = 8.2 Hz, 1H), 4.28 (dd, *J* = 12.5, 6.2 Hz, 1H), 2.56 – 2.45 (m, 2H), 2.26 – 2.20 (m, 1H), 2.11 (d, *J* = 14.1 Hz, 1H), 2.00 (d, *J* = 14.1 Hz, 1H), 1.87 (dd, *J* = 16.8, 9.3 Hz, 1H), 1.78 – 1.68 (m, 2H), 1.53-1.44 (m, 2H), 1.31 (s, 3H), 1.24 (s, 3H). <sup>13</sup>C NMR (126 MHz, CDCl<sub>3</sub>) δ 202.75, 142.99, 138.11, 138.05, 131.92, 128.97, 128.27, 127.83, 127.67, 126.14, 125.41, 61.34, 59.27, 51.27, 43.57, 36.26, 33.94, 31.96, 31.92, 30.42, 20.14. MS (DART) exact mass calculated for [C<sub>23</sub>H<sub>27</sub>O]: 319.2056, found 319.2068.

**ethyl (1*R*,2*S*)-2-benzoyl-4,4-dimethyl-1-phenylcyclopentane-1-carboxylate (21).**

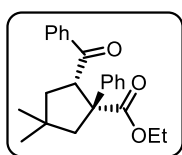

Followed Method A, the crude product was purified by column chromatography (1:9, EtOAc/hexanes) to give 30.5 mg (87% yield) of **21** as a white solid. The dr was determined to be 9:1 cis/trans. cis diastereoisomer: 80% ee [AD, 2.0% iPrOH in hexanes, 1.0 mL/min, 223 nm; t<sub>1</sub> = 9.13 min, t<sub>2</sub> = 16.87 min]. [α]<sub>D</sub><sup>22</sup> 0.512 (c2.54, CHCl<sub>3</sub>). IR (Film): 2955, 2903, 2868, 1728, 1683, 1596, 1580, 1498, 1447, 1365, 1244, 1219, 1171, 1120, 1058, 1011, 756, 737, 696; <sup>1</sup>H NMR (500 MHz, CDCl<sub>3</sub>) δ 7.99 (dd, *J* = 8.3, 1.2 Hz, 2H), 7.56 (dd, *J* = 7.5, 2.1 Hz, 3H), 7.48 (t, *J* = 7.6 Hz, 2H), 7.35 (t, *J* = 7.7 Hz, 2H), 7.28-7.24 (m, 1H), 4.74 (dd, *J* = 9.1, 3.6 Hz, 1H), 4.06-3.93 (m, 2H), 2.94 (d, *J* = 13.8 Hz, 1H), 2.42 (dd, *J* = 13.8, 1.0 Hz, 1H), 2.13 (dd, *J* = 13.7, 9.1 Hz, 1H), 1.94 (dd, *J* = 13.7, 3.7 Hz, 1H), 1.04-1.01 (m, 6H), 0.79 (s, 3H). <sup>13</sup>C NMR (126 MHz, CDCl<sub>3</sub>) δ 201.32, 174.84, 142.05, 136.48, 132.80, 128.56, 128.50, 128.43, 126.96, 126.50, 61.04, 60.61, 54.19, 50.32, 44.63, 38.00, 32.10, 31.82, 13.80. MS (DART) exact mass calculated for [C<sub>23</sub>H<sub>27</sub>O<sub>3</sub>]: 351.1955, found 351.1966.

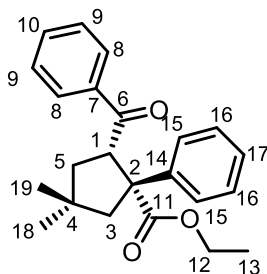

Assignment of aliphatics based on 1D <sup>1</sup>H supported by COSY. Assignment of aromatics based on COSY. Assignment of Me's based on ROESY. Major product assigned as cis based on: ROE between H1, H3' (top), H5' (top) and a single Me (19) defines "top". ROE from H3'' (bottom) and H5'' (bottom) to Me (18) gives "bottom". Strong ROE from H15 to H1, H3' and H5' indicate C-2 phenyl is on top.

**phenyl((1*S*,2*S*)-2,4,4-trimethyl-2-(prop-1-en-2-yl)cyclopentyl)methanone (22).**

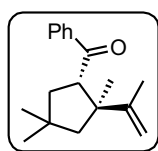

Followed Method A, the crude product was purified by column chromatography (1:9, EtOAc/hexanes) to give 23.0 mg (90% yield) of **22** as a yellow oil. The dr was determined to be 4:1 dr. trans diastereoisomer: 96% ee [AS, 0.1% iPrOH in hexanes, 1.0 mL/min, 223 nm; t<sub>1</sub> = 6.09 min, t<sub>2</sub> = 7.08 min]. [α]<sub>D</sub><sup>22</sup> 0.111 (c1.26, CHCl<sub>3</sub>). IR (Film): 3085, 3060, 2953,



2867, 1678, 1636, 1597, 1462, 1447, 1370, 1225, 1207, 1180, 1015, 1003, 974, 889, 833, 729, 711, 691, 669;  $^1\text{H}$  NMR (500 MHz,  $\text{CDCl}_3$ )  $\delta$  7.83 (dd,  $J = 8.3, 1.2$  Hz, 2H), 7.53 – 7.49 (m, 1H), 7.45 – 7.40 (m, 2H), 4.61 – 4.59 (m, 2H), 4.04 (dd,  $J = 12.1, 6.5$  Hz, 1H), 2.24 (t,  $J = 12.5$  Hz, 1H), 1.90 (d,  $J = 13.6$  Hz, 1H), 1.78 (d,  $J = 1.2$  Hz, 3H), 1.73 (dd,  $J = 13.0, 6.4$  Hz, 1H), 1.50 (d,  $J = 13.6$  Hz, 1H), 1.19 (d,  $J = 5.8$  Hz, 6H), 1.14 (s, 3H).  $^{13}\text{C}$  NMR (126 MHz,  $\text{CDCl}_3$ )  $\delta$  202.56, 150.72, 139.01, 132.43, 128.28, 127.95, 110.38, 54.46, 52.49, 52.25, 44.59, 36.26, 31.89, 31.63, 23.35, 20.50. MS (DART) exact mass calculated for  $[\text{C}_{18}\text{H}_{25}\text{O}]$ : 257.1900, found 257.1906.

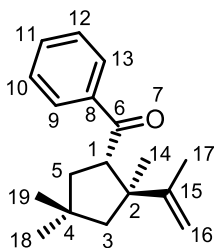

Assignments were based on COSY and ROESY. In major diastereomer ROE observed between H1 and H19 and very weak ROE between H1 and H14. In minor, strong ROE H1 to H14 and very weak H1 to H19. This indicates C14 is syn to carbonyl in the major isomer. In major, ROE H1 to H3' and H19 to H3', so H3' is "top" and H3'' is "bottom". Strong ROE from H3'' (bottom) to H14. ROE from H1 to H16. Minor: H1 to H14; H1 to H19 (weak), H5' (top) to H19 and H14, H5'' (bottom) to H18 and H16 so the vinyl group is bottom.

**(1*S*,2*S*)-2-benzoyl-*N,N*,4,4-tetramethylcyclopentane-1-carboxamide (23).** Followed

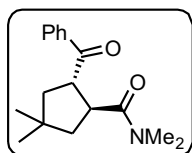

Method A, the crude product was purified by column chromatography (1:9, methanol/DCM) to give 24.8 mg (91% yield) of **23** as a yellow oil. The dr was determined to be 11:1. trans diastereoisomer: 96% ee [AD, 12% iPrOH in hexanes, 1.0 mL/min, 223 nm;  $t_1 = 4.04$  min,  $t_2 = 5.20$  min].  $[\alpha]_D^{22}$  0.051 (c0.28,  $\text{CHCl}_3$ ). IR (Film): 2952, 2931, 2866, 1677, 1639, 1580, 1496, 1463, 1448, 1416, 1367, 1255, 1220, 1139, 1016, 884, 826, 776, 701;  $^1\text{H}$  NMR (500 MHz,  $\text{CDCl}_3$ )  $\delta$  7.98 (dd,  $J = 8.3, 1.4$  Hz, 2H), 7.53 (t,  $J = 7.4$  Hz, 1H), 7.44 (t,  $J = 7.7$  Hz, 2H), 4.52–4.46 (m, 1H), 3.87–3.81 (m, 1H), 3.09 (s, 3H), 2.91 (s, 3H), 2.07 (dd,  $J = 12.7, 9.8$  Hz, 1H), 1.89 (dd,  $J = 12.4, 8.7$  Hz, 1H), 1.68 (dd,  $J = 12.5, 9.9$  Hz, 1H), 1.59–1.57 (m, 1H), 1.15 (s, 3H), 1.04 (s, 3H).  $^{13}\text{C}$  NMR (126 MHz,  $\text{CDCl}_3$ )  $\delta$  202.15, 174.52, 136.63, 132.95, 128.69, 128.48, 50.33, 45.98, 45.13, 42.65, 40.06, 37.26, 35.75, 29.47, 29.22. MS (DART) exact mass calculated for  $[\text{C}_{17}\text{H}_{23}\text{NO}_2]$ : 274.1802, found 274.1803.

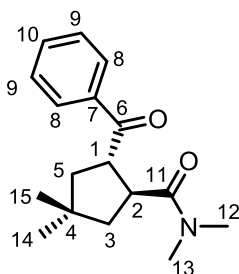

Assignments were based on 1D  $^1\text{H}$  supported by COSY and HSQC. Major product *trans*: ROE from H1, H3' (top), H5' (top) to H15 defines "top". ROE from H14 to H3'' (bottom), H5'' (bottom) and H2 defines "bottom" and shows that H2 is *trans* to H1.

***tert*-butyl (1*S*,2*S*)-2-benzoyl-4,4-dimethylcyclopentane-1-carboxylate (**24**).**

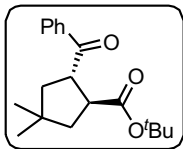

Method C, at  $-35\text{ }^\circ\text{C}$  for 50 h, the crude product was purified by column chromatography (1:9, EtOAc/hexanes) to give 27.5 mg (91% yield) of **24** as a yellow oil. The dr was determined to be >19:1. *trans* diastereoisomer: 73% ee [IA, 0.5% iPrOH in hexanes, 1.0 mL/min, 223 nm;  $t_1 = 7.44$  min,  $t_2 = 8.06$  min].  $[\alpha]_D^{22}$  0.305 ( $c$  1.89,  $\text{CH}_2\text{Cl}_2$ ). IR (Film): 2955, 2933, 2868, 1721, 1682, 1597, 1581, 1559, 1448, 1391, 1367, 1315, 1293, 1252, 1232, 1208, 1151, 1014, 981, 849, 773, 700, 659;  $^1\text{H}$  NMR (500 MHz,  $\text{CDCl}_3$ )  $\delta$  7.99-7.97 (m, 2H), 7.55 (t,  $J = 7.4$  Hz, 1H), 7.46 (t,  $J = 7.7$  Hz, 2H), 4.22 (q,  $J = 8.7$  Hz, 1H), 3.55 (q,  $J = 8.8$  Hz, 1H), 2.00-1.90 (m, 2H), 1.78 (dd,  $J = 12.7, 8.9$  Hz, 1H), 1.62-1.57 (m, 1H), 1.36 (s, 9H), 1.10 (s, 3H), 1.03 (s, 3H).  $^{13}\text{C}$  NMR (126 MHz,  $\text{CDCl}_3$ )  $\delta$  201.45, 174.63, 136.78, 132.92, 128.56, 128.51, 80.34, 48.99, 46.58, 45.94, 44.61, 39.94, 29.07, 28.78, 27.98. MS (DART) exact mass calculated for  $[\text{C}_{19}\text{H}_{27}\text{O}_3]$ : 303.1955, found 303.1964.

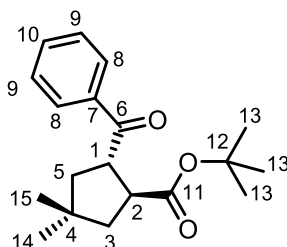

Assignments were based on 1D  $^1\text{H}$  supported by COSY and HSQC. Major product *trans*: ROE from H1, H3' (top), H5' (top) to H15 defines "top". ROE from H14 to H3'' (bottom), H5'' (bottom) and H2 defines "bottom" and shows that H2 is *trans* to H1.

***tert*-butyl (1*S*,2*S*)-2-benzoyl-1,4,4-trimethylcyclopentane-1-carboxylate (**25**).**

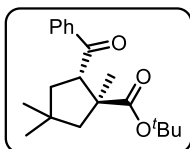

Followed Method A, the crude product was purified by column chromatography (1:9, EtOAc/hexanes) to give 30.0 mg (95% yield) of **25** as a yellow oil. The dr was determined to be >19:1. *trans* diastereoisomer: 65% ee [AD, 0.5% iPrOH in hexanes, 1.0 mL/min, 223 nm;  $t_1 = 3.70$  min,  $t_2 = 4.29$  min].  $[\alpha]_D^{22}$  0.978 ( $c$  3.23,  $\text{CHCl}_3$ ). IR (Film): 2954, 2934, 2868, 1715, 1677, 1597, 1581, 1457, 1448, 1367, 1325, 1245, 1219, 1147, 1012, 978, 849, 738, 706, 690, 667;  $^1\text{H}$  NMR (500 MHz,  $\text{CDCl}_3$ )  $\delta$  8.02 (dd,  $J = 8.4, 1.3$  Hz, 2H), 7.54 – 7.50 (m, 1H), 7.42 (t,  $J = 7.6$  Hz, 2H), 4.65 (dd,  $J = 11.4, 6.8$  Hz, 1H), 2.22 (dd,  $J = 12.8, 11.5$  Hz, 1H), 2.12 (dd,  $J = 13.4, 1.7$  Hz, 1H), 1.66 (ddd,  $J = 12.9, 6.9, 1.7$  Hz, 1H), 1.53 (d,  $J = 13.4$  Hz, 1H), 1.38 (s, 9H), 1.14 (s, 3H), 1.10 (s, 3H), 1.02 (s, 3H).  $^{13}\text{C}$  NMR (126 MHz,  $\text{CDCl}_3$ )  $\delta$  201.81, 176.84, 138.26, 132.76, 128.58, 128.42, 80.62, 54.95, 53.35, 50.71, 43.67, 37.76, 30.29, 28.95, 27.80, 22.48. MS (DART) exact mass calculated for  $[\text{C}_{20}\text{H}_{29}\text{O}_3]$ : 317.2111, found 317.2120.

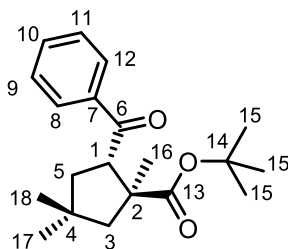

Assignment of rings and tBu from 1D  $^1\text{H}$  supported by COSY. Assignment of Me's from ROESY. Water overlapped with one line in  $\text{H3''}$ , doublet confirmed by HSQC. Assigned as *trans* based on:  $\text{H1}$ ,  $\text{H3'}$  (top) and  $\text{H5'}$  (top) to Me18;  $\text{H5''}$  (bottom) and  $\text{H3''}$  (bottom) to two methyls (Me16 and 17). In COSY Me17 showed weak correlations to both  $\text{H3'}$  and  $\text{H5'}$ , Me16 couples to only  $\text{H3'}$ .

**((1*R*,2*S*)-4,4-dimethyl-2-(phenylsulfonyl)cyclopentyl)(phenyl)methanone (26).**

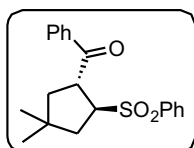

Followed Method C, at  $-25\text{ }^{\circ}\text{C}$ , the crude product was purified by column chromatography (2:3, EtOAc/hexanes) to give 28.6 mg (81% yield) of **26** as a white solid. The dr was determined to be >19:1. *trans* diastereoisomer: 51% ee [AD, 6% iPrOH in hexanes, 1.0 mL/min, 250 nm;  $t_1 = 10.92\text{ min}$ ,  $t_2 = 14.14\text{ min}$ ].  $[\alpha]_{\text{D}}^{22}$  0.036 ( $c$ 0.48,  $\text{CHCl}_3$ ). IR (Film): 3060, 2958, 2869, 1683, 1596, 1582, 1559, 1447, 1306, 1238, 1147, 1087, 1010, 974, 768, 744, 721, 700, 688, 646;  $^1\text{H}$  NMR (500 MHz,  $\text{CDCl}_3$ )  $\delta$  7.82 (dd,  $J = 16.5, 8.3\text{ Hz}$ , 4H), 7.57-7.50 (m, 2H), 7.45-7.39 (m, 4H), 4.65-4.60 (m, 1H), 4.38-4.33 (m, 1H), 2.21-2.15 (m, 2H), 1.90 (dd,  $J = 13.0, 8.8\text{ Hz}$ , 1H), 1.58 (dd,  $J = 13.4, 7.3\text{ Hz}$ , 1H), 1.18 (s, 3H), 0.96 (s, 3H).  $^{13}\text{C}$  NMR (126 MHz,  $\text{CDCl}_3$ )  $\delta$  198.31, 138.67, 135.36, 133.52, 133.37, 129.07, 128.57, 128.47, 128.32, 64.53, 47.09, 46.33, 40.81, 40.48, 28.70, 28.02. MS (DART) exact mass calculated for  $[\text{C}_{20}\text{H}_{23}\text{O}_3\text{S}]$ : 343.1362, found 343.1374.

**((1*S*,2*S*)-4,4-dimethyl-2-(4,4,5,5-tetramethyl-1,3,2-dioxaborolan-2-**

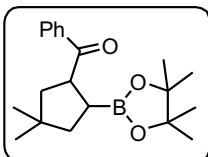

**yl)cyclopentyl)(phenyl)methanone (27).** Followed Method C, at  $-25\text{ }^{\circ}\text{C}$ , the crude product was purified by column chromatography (1:9, EtOAc/hexanes) to give 25.9 mg (79% yield) of **27** as a yellow oil. The dr was determined to be >19:1. *trans* diastereoisomer: 46% ee [AD, 0.5% iPrOH in hexanes, 1.0 mL/min, 223 nm;  $t_1 = 5.36\text{ min}$ ,  $t_2 = 7.56\text{ min}$ ].  $[\alpha]_{\text{D}}^{22}$  0.211 ( $c$ 1.16,  $\text{CHCl}_3$ ). IR (Film): 2976, 2951, 2932, 2865, 1681, 1597, 1581, 1466, 1448, 1379, 1315, 1232, 1213, 1142, 1009, 971, 911, 589, 770, 698, 669;  $^1\text{H}$  NMR (500 MHz,  $\text{CDCl}_3$ )  $\delta$  8.02-8.00 (m, 2H), 7.54-7.50 (m, 1H), 7.43 (t,  $J = 7.6\text{ Hz}$ , 2H), 3.97 (q,  $J = 8.9\text{ Hz}$ , 1H), 2.03 (q,  $J = 9.1\text{ Hz}$ , 1H), 1.83 (dd,  $J = 12.7, 9.2\text{ Hz}$ , 1H), 1.75 (dd,  $J = 12.3, 9.2\text{ Hz}$ , 1H), 1.67 (dd,  $J = 12.7, 8.6\text{ Hz}$ , 1H), 1.52 (dd,  $J = 12.3, 9.2\text{ Hz}$ , 1H), 1.19 (d,  $J = 2.9\text{ Hz}$ , 12H), 1.07 (s, 3H), 1.02 (s, 3H).  $^{13}\text{C}$  NMR (126 MHz,  $\text{CDCl}_3$ )  $\delta$  202.95, 137.33, 132.49, 128.62, 128.30, 83.20, 48.86, 46.06, 43.66, 40.69, 29.01, 28.76, 24.73, 24.63. MS (DART) exact mass calculated for  $[\text{C}_{20}\text{H}_{30}\text{BO}_3]$ : 329.2283, found 329.2294.

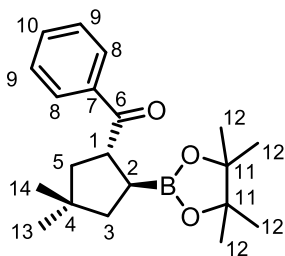

Assignments were based on 1D  $^1\text{H}$  supported by COSY and HSQC. Major product *trans*: ROE from H1, H3' (top), H5' (top) to H14 defines "top". ROE from H13 to H3'' (bottom), H5'' (bottom) and H2 defines "bottom" and shows that H2 is *trans* to H1.

**(4,4-dimethyl-2,2-diphenylcyclopentyl)(phenyl)methanone (28).** Followed Method C,

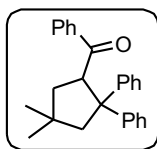

at  $-25\text{ }^\circ\text{C}$ , the crude product was purified by column chromatography (1:9, EtOAc/hexanes) to give 31.9 mg (90% yield) of **28** as a white solid: 45% ee [AD, 1.0% iPrOH in hexanes, 1.0 mL/min, 223 nm;  $t_1 = 3.82$  min,  $t_2 = 4.72$  min].  $[\alpha]_D^{22}$  0.898 (c3.27,  $\text{CHCl}_3$ ). IR (Film): 3058, 3025, 2935, 2866, 2097, 1677, 1596, 1580, 1492, 1446, 1362, 1265, 1218, 1173, 1118, 1034, 974, 915, 769, 748, 696, 644;  $^1\text{H}$  NMR (500 MHz,  $\text{CDCl}_3$ )  $\delta$  7.74-7.72 (m, 2H), 7.45 (dd,  $J = 7.4, 3.7$  Hz, 3H), 7.35 (t,  $J = 7.7$  Hz, 2H), 7.30 (t,  $J = 7.8$  Hz, 2H), 7.15 (t,  $J = 7.3$  Hz, 1H), 7.09 (d,  $J = 7.3$  Hz, 2H), 7.01 (t,  $J = 7.7$  Hz, 2H), 6.92 (t,  $J = 7.3$  Hz, 1H), 5.17 (d,  $J = 8.8$  Hz, 1H), 3.28 (d,  $J = 12.6$  Hz, 1H), 2.44 (dd,  $J = 12.7, 1.4$  Hz, 1H), 2.23 (dd,  $J = 13.9, 8.8$  Hz, 1H), 1.98 (dd,  $J = 13.9, 1.7$  Hz, 1H), 1.22 (s, 3H), 0.67 (s, 3H).  $^{13}\text{C}$  NMR (126 MHz,  $\text{CDCl}_3$ )  $\delta$  202.92, 148.59, 147.12, 138.45, 132.16, 128.30, 128.22, 127.96, 127.74, 127.30, 126.74, 125.70, 125.33, 59.74, 53.37, 51.84, 44.07, 38.11, 32.22, 31.81. MS (DART) exact mass calculated for  $[\text{C}_{26}\text{H}_{27}\text{O}]$ : 355.2056, found 355.2067.

**1-((1*S*,2*S*)-4,4-dimethyl-2-phenylcyclopentyl)ethan-1-one (29).** Followed Method A,

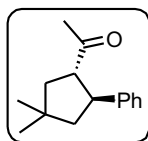

the crude product was purified by column chromatography (1:9, EtOAc/hexanes) to give 17.7 mg (82% yield) of **29** as a yellow oil. The dr was determined to be 5:1. *trans* diastereoisomer: 13% ee [AD, 0.3% iPrOH in hexanes, 1.0 mL/min, 220 nm;  $t_1 = 6.19$  min,  $t_2 = 6.82$  min].  $[\alpha]_D^{22}$  0.025 (c0.49,  $\text{CHCl}_3$ ). IR (Film): 2951, 2930, 2903, 2864, 1707, 1584, 1494, 1452, 1365, 1356, 1235, 1166, 859, 761, 747, 699;  $^1\text{H}$  NMR (500 MHz,  $\text{CDCl}_3$ )  $\delta$  7.30-7.24 (m, 5H), 3.52-3.46 (m, 1H), 3.16 (q,  $J = 9.3$  Hz, 1H), 1.98-1.95 (m, 4H), 1.92-1.90 (m, 1H), 1.79-1.76 (m, 1H), 1.72-1.68 (m, 1H), 1.16 (s, 3H), 1.10 (s, 3H).  $^{13}\text{C}$  NMR (126 MHz,  $\text{CDCl}_3$ )  $\delta$  210.23, 143.89, 128.51, 127.25, 126.33, 60.14, 50.32, 47.94, 44.34, 38.39, 30.53, 29.96, 29.71. MS (DART) exact mass calculated for  $[\text{C}_{15}\text{H}_{21}\text{O}]$ : 217.1587, found 217.1593.

**((1*S*,2*S*,4*S*)-2,4-diphenylcyclopentyl)(phenyl)methanone (30).** Followed Method C, at

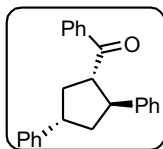

$0\text{ }^\circ\text{C}$  for 48 h, the crude product was purified by column chromatography (1:9, EtOAc/hexanes) to give 30.3 mg (93% yield) of **30** as a yellow oil. The dr was determined to be 2:1 dr. Only two diastereomers were observed with crude  $^1\text{H}$  NMR. major diastereoisomer: 79% ee [AD, 1.0% iPrOH in hexanes, 1.0 mL/min, 223 nm;  $t_1 = 13.54$  min,  $t_2 = 24.87$  min]. minor diastereoisomer: 93% ee [AD, 1.0% iPrOH in hexanes, 1.0 mL/min, 223 nm;  $t_1 = 12.49$

min,  $t_2 = 17.04$  min].  $[\alpha]_D^{22}$  0.288 (c0.93,  $\text{CHCl}_3$ ). IR (Film): 3060, 3027, 2950, 2868, 1678, 1598, 1580, 1494, 1448, 1368, 1347, 1262, 1218, 1180, 1030, 1004, 754, 698; Major:  $^1\text{H}$  NMR (599 MHz,  $\text{CDCl}_3$ )  $\delta$  4.09-4.05 (m, 1H), 3.96 (q,  $J = 8.3$  Hz, 1H), 3.62-3.56 (m, 1H), 2.61 (dq,  $J = 13.5, 6.8$  Hz, 1H), 2.43 – 2.33 (m, 2H), 2.21-2.13 (m, 1H).  $^{13}\text{C}$  NMR (126 MHz,  $\text{CDCl}_3$ )  $\delta$  201.41, 145.27, 144.65, 136.95, 128.58, 128.47, 128.46, 128.46, 128.41, 127.26, 127.11, 126.27, 126.25, 55.62, 47.43, 45.45, 42.30, 40.56. MS (DART) exact mass calculated for  $[\text{C}_{24}\text{H}_{23}\text{O}]$ : 327.1743, found 327.1752.

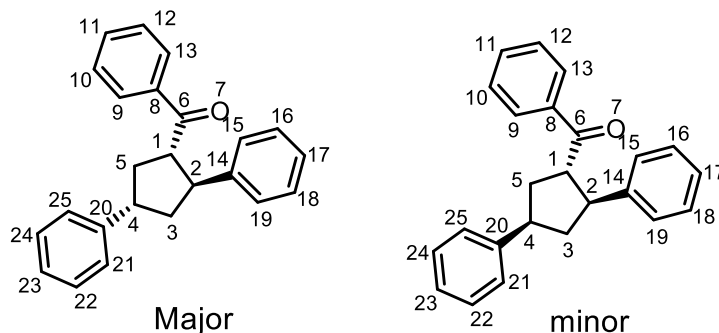

In major, H-1 gives ROEs to H4 and H5' (top), whereas H2 gives ROE to H5'' (H3' and H3'' are overlapped so ROEs are unclear) indicating that H1 is on the same face as H4 and opposite to H2. In minor, a strong ROE is observed between H2 and H4 while no ROE is present between H1 and H4 indicating that the C4 stereogenic center is inverted relative to major. ROE correlations to H-5s and H-3s are obscured by TOCSY artifacts.

### Section 3. Preparation and characterization of catalysts and substrates

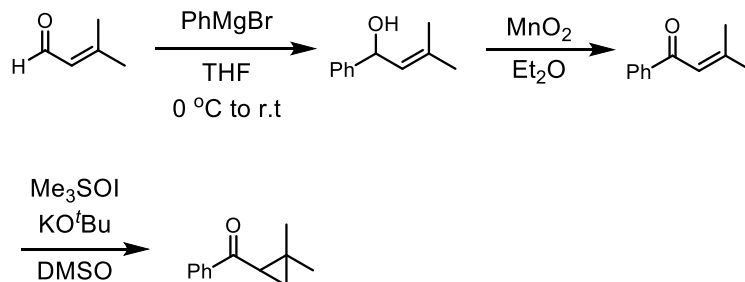

**Method D.** Representative procedure:<sup>[1]</sup> To a solution of 3-methyl-2-butenal (2.52 g, 30 mmol, 1.0 equiv) in THF (50 mL), PhMgBr (11 mL, 33 mmol, 1.1 equiv) was added at 0 °C. The mixture was then stirred for 2 h at room temperature. Subsequently, the reaction was quenched with water (100 mL) and extracted with EtOAc (3 times). The combined organic layers were washed with brine, dried over Na<sub>2</sub>SO<sub>4</sub> and concentrated in vacuo. The crude product was purified by column chromatography on silica gel (20% EtOAc in hexanes) to afford 4.37 g of 3-methyl-1-phenylbut-2-en-1-ol (90% yield).

To a solution of 3-methyl-1-phenylbut-2-en-1-ol (3.24 g, 20 mmol, 1 equiv) in Et<sub>2</sub>O (120 mL) was added MnO<sub>2</sub> (activated, 17.4 g, 200 mmol, 10 equiv). The mixture was then stirred for 12 h at room temperature. Subsequently, the reaction was filtered and the solvent was removed. The crude product was purified by column chromatography on silica gel (10% EtOAc in hexanes) to afford 2.56 g of 3-methyl-1-phenylbut-2-en-1-one (80% yield).

A flame-dried 100 mL flask was charged with KO<sup>t</sup>Bu (1.34 g, 12 mmol, 1.2 equiv) and trimethylsulfoxonium iodide (2.64 g, 12 mmol, 1.2 equiv), DMSO (40 mL) was then added dropwise to the flask, the reaction mixture was stirred for an additional 15 min, during which the solution became clear. 3-Methyl-1-phenylbut-2-en-1-one (1.6 g, 10 mmol, 1.0 equiv) in 20 mL of DMSO was added in one portion via syringe. The reaction mixture was allowed to stir for 4 h at room temperature, then quenched by addition of water and the mixture extracted three times with Et<sub>2</sub>O. The combined organic layers were dried over Na<sub>2</sub>SO<sub>4</sub>, and volatiles were removed under reduced pressure to yield the crude product. The crude product was purified by column chromatograph on silica gel (10% EtOAc in hexanes) to afford 1.65 g of 2,2-dimethylcyclopropyl(phenyl)methanone (95% yield).

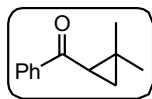

**(2,2-dimethylcyclopropyl)(phenyl)methanone (1).**<sup>[1]</sup> <sup>1</sup>H NMR (300 MHz, CDCl<sub>3</sub>) δ 7.96-7.93 (m, 2H), 7.58-7.52 (m, 1H), 7.47 (t, *J* = 7.2 Hz, 2H), 2.48 (dd, *J* = 7.5, 5.6 Hz, 1H), 1.52 (dd, *J* = 5.6, 4.1 Hz, 1H), 1.36 (s, 3H), 1.09 (s, 3H), 0.96 (dd, *J* = 7.5, 4.1 Hz, 1H). Characterization data consistent with literature.<sup>[1]</sup>

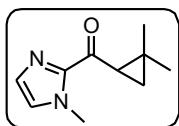

**(2,2-dimethylcyclopropyl)(1-methyl-1*H*-imidazol-2-yl)methanone.**

The synthesis of the precursor prior to oxidation, 3-methyl-1-(1-methyl-1*H*-imidazol-2-yl)but-2-en-1-ol, was conducted using a modified literature procedure from 3-methyl-2-butenal and 1-methylimidazole.<sup>[2]</sup>

Subsequent MnO<sub>2</sub> oxidation followed by cyclopropanation (see Method D) furnished the desired substrate. <sup>1</sup>H NMR (300 MHz, CDCl<sub>3</sub>) δ 7.15 (d, *J* = 1.0 Hz, 1H), 7.00 (d, *J* = 1.0 Hz, 1H), 3.99 (s, 3H), 3.16 (dd, *J* = 7.8, 5.7 Hz, 1H), 1.39 (dd, *J* = 5.7, 3.7 Hz, 1H), 1.30 (s, 3H), 1.19 (s, 3H), 1.02 (dd, *J* = 7.8, 3.7 Hz, 1H). <sup>13</sup>C NMR (126 MHz, CDCl<sub>3</sub>) δ 190.58, 144.61, 128.86, 126.46, 36.28, 32.07, 28.37, 27.31, 24.22, 18.19.

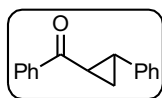

**trans-phenyl(2-phenylcyclopropyl)methanone.**<sup>[3]</sup> <sup>1</sup>H NMR (300 MHz, CDCl<sub>3</sub>) δ 8.01-7.98 (m, 2H), 7.56 (t, *J* = 7.3 Hz, 1H), 7.46 (t, *J* = 7.4 Hz, 2H), 7.32 (t, *J* = 7.1 Hz, 2H), 7.23-7.17 (m, 3H), 2.94-2.88 (m, 1H), 2.74-2.67 (m, 1H), 1.96-1.90 (m, 1H), 1.59-1.53 (m, 1H). Characterization data consistent with literature.<sup>[3]</sup>

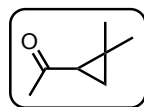

**1-(2,2-dimethylcyclopropyl)ethan-1-one.** <sup>1</sup>H NMR (300 MHz, CDCl<sub>3</sub>) δ 2.24 (s, 3H), 1.86 (dd, *J* = 7.6, 5.5 Hz, 1H), 1.24 (dd, *J* = 5.6, 4.1 Hz, 1H), 1.20 (s, 3H), 1.09 (s, 3H), 0.82 (dd, *J* = 7.6, 4.0 Hz, 1H).

**Method E.** Synthesis of salen ligand for catalyst **3**: In an oven-dried round bottom flask, 3-(adamantan-1-yl)-5-methylsalicylaldehyde (540 mg, 2.0 mmol, 2.0 equiv; synthesized according to ref. [4]) and (1*R*,2*R*)-1,2-diphenylethane-1,2-diamine (212 mg, 1.0 mmol, 1 equiv) were dissolved in EtOH (5.0 mL). The reaction was refluxed overnight (ca. 10 h) and then cooled to room temperature. The precipitate was collected via vacuum filtration and washed with hexanes to yield the desired salen ligand (614 mg, 86% yield) as a yellow solid.

Synthesis of catalyst **3** (*this procedure was conducted on a bench top using standard Schlenk technique*):<sup>[5]</sup> In an oven-dried round bottom flask, the salen ligand (358 mg, 0.5 mmol, 1 equiv) was dissolved in THF (5 mL) to afford a yellow solution, which was cooled to -78 °C under N<sub>2</sub>. Then TiCl<sub>4</sub> solution (1.0 M in toluene; 0.5 mL, 0.5 mmol, 1.0 equiv) was added carefully into the above solution at -78 °C. This red suspension was heated under reflux for 3 h. After the reaction was cooled to room temperature, the dark red solid was filtered off and washed with diethyl ether to afford catalyst **3**.

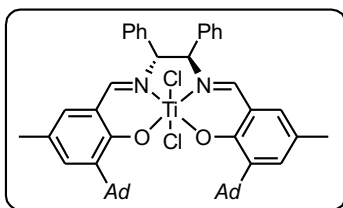

**Catalyst 3.** <sup>1</sup>H NMR (500 MHz, CDCl<sub>3</sub>) δ 7.82 (d, *J* = 0.9 Hz, 2H), 7.33 (d, *J* = 2.2 Hz, 2H), 7.28-7.27 (m, 6H), 7.12-7.11 (m, 4H), 6.80 (d, *J* = 2.1 Hz, 2H), 5.55 (s, 2H), 2.25-2.22 (m, 18H), 2.13-2.11 (m, 6H), 1.84-1.81 (m, 6H), 1.77-1.74 (m, 6H). <sup>13</sup>C NMR (126 MHz, CDCl<sub>3</sub>) δ 164.81, 160.82, 137.60, 136.15, 135.97, 133.72, 131.34, 129.23, 128.95, 126.24, 41.67, 37.80, 36.93, 28.90, 20.48. MS (DART) exact mass calculated for [C<sub>50</sub>H<sub>54</sub>N<sub>2</sub>O<sub>2</sub>TiCl]<sup>+</sup>: 797.3348, found 797.3359.

## Section 4. Mechanistic studies

**General information:** ESR spectra were recorded on a Bruker ELEXYS-II E500 spectrometer at National Biomedical Center for Advanced Electron Spin Resonance Technology(ACERT) at a microwave frequency of 9.32 GHz, microwave power of 0.63 mW, and modulation amplitude of 2 G (0.4 G for the experiment described in Section 5). Samples were prepared in a N<sub>2</sub>-filled glovebox.

### Spin trapping with DMPO<sup>[6]</sup>

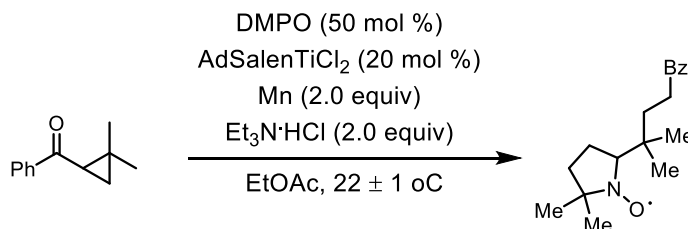

In a N<sub>2</sub>-filled glovebox, an oven-dried 1.5 dr vial equipped with a magnetic stir bar was charged with Mn (5.5 mg, 0.10 mmol, 2.0 equiv), **3** (8.3 mg, 0.01, 20 mol%), Et<sub>3</sub>N·HCl (13.7 mg, 0.1 mmol, 2.0 equiv) and EtOAc (0.5 mL). The mixture was stirred vigorously for 10 min to allow reduction of the pre-catalyst. Subsequently, **1** (8.7 mg, 0.050 mmol, 1 equiv), and DMPO (2.8 mg, 0.025 mmol, 50 mol%) were added, and the resulting mixture was stirred at room temperature (22 ± 1 °C) for 0.5 h. Subsequently, the supernatant was analyzed by ESR and mass spectrometry (DART). ESR spectrum showed an average *g* value of 2.0061 with two hyperfine splittings of 17.2 G (assigned to the nitroxide nitrogen) and 14.5 G (assigned to the  $\alpha$ -hydrogen). High-resolution mass spectrum showed a molecular weight (*M<sub>w</sub>*) of 288.19664 (1.04%), corresponding to nitroxide product **31** (calculated for M<sup>+</sup>: *M<sub>w</sub>* = 289.19635; ionization by losing an electron to form the oxoammonium ion).

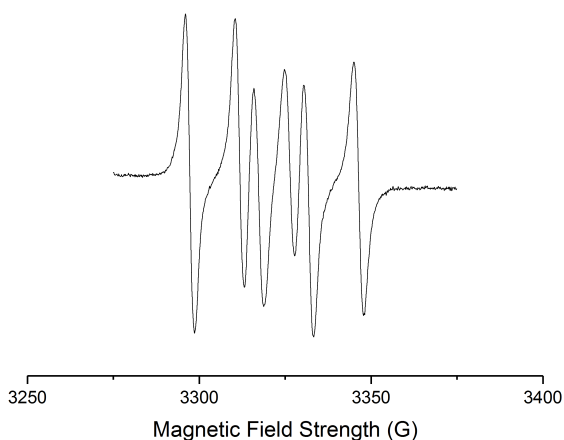

**Figure S1.** ESR spectrum of the reaction mixture in the presence of DMPO. Data are consistent with structurally analogous nitroxyl radicals in ref. [6].



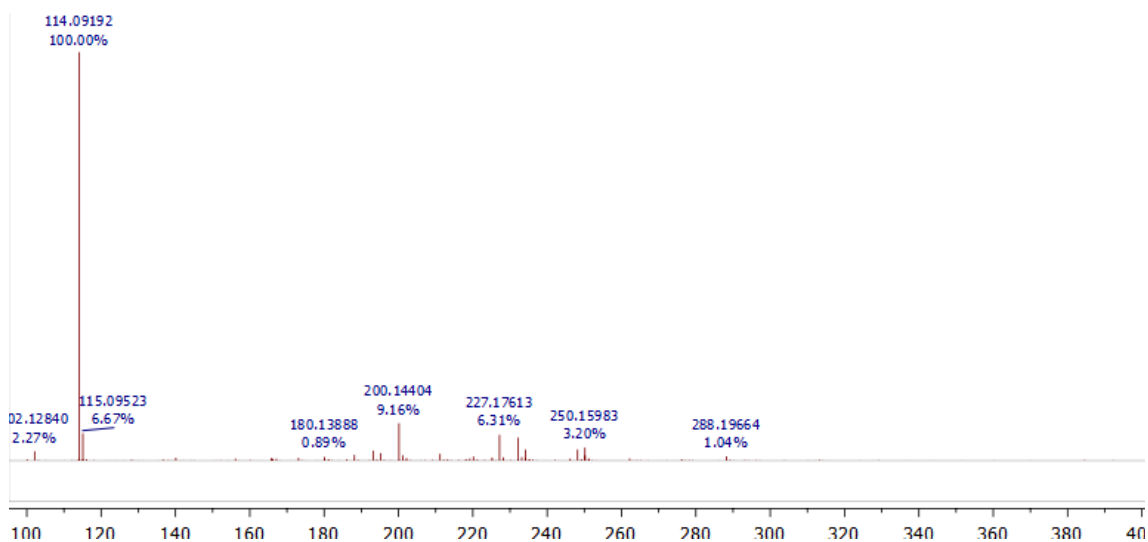

**Figure S2.** MS data of the reaction mixture in the presence of DMPO.

### ESR spectral data of catalysts

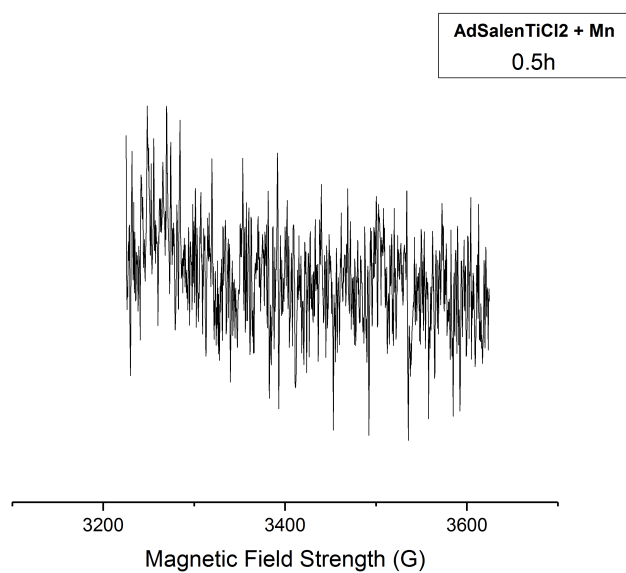

**Figure S3.** ESR spectrum of **3** (20 mM) and Mn (10 equiv) in EtOAc for **0.5 h**

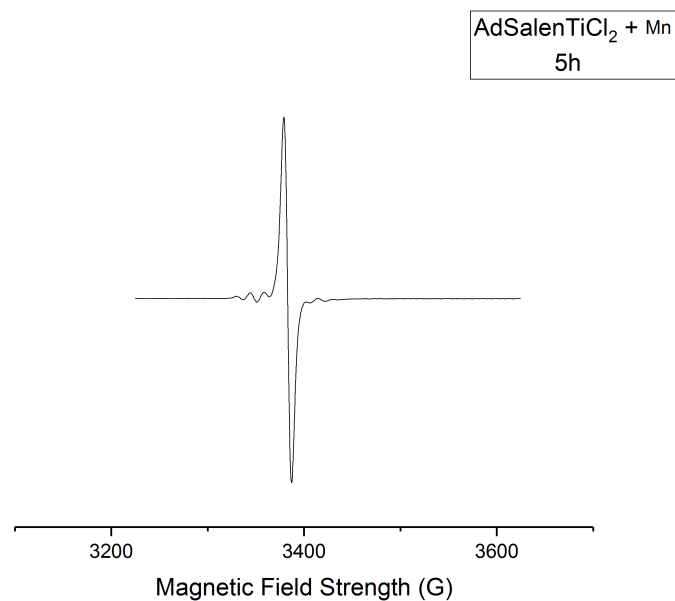

**Figure S4.** ESR spectrum of **3** (20 mM) and Mn (10 equiv) in EtOAc for **5 h**. Data are consistent with our previous analysis of Ti(III) complexes.<sup>[7]</sup>

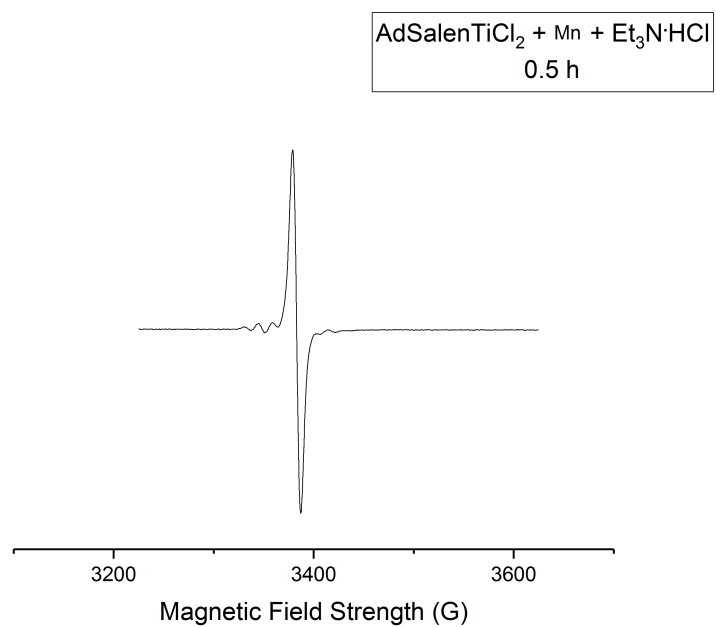

**Figure S5.** ESR spectrum of **3** (20 mM), Et<sub>3</sub>N·HCl (200 mM) and Mn (10 equiv) in EtOAc for **0.5 h**

## Section 5. X-ray crystallographic data

**General information:** Low-temperature X-ray diffraction data for **2** (CCDC-1589640) and **17** (CCDC-1589641) were collected on a Rigaku XtaLAB Synergy diffractometer coupled to a RigakuHypix detector with Cu K $\alpha$  radiation ( $\lambda$  = 1.54184 Å), from a PhotonJet micro-focus X-ray source at 100 K. The diffraction images were processed and scaled using the CrysAlisPro software.<sup>[8]</sup> The structures were solved through intrinsic phasing using SHELXT<sup>[9]</sup> and refined against F<sup>2</sup> on all data by full-matrix least squares with SHELXL<sup>[10]</sup> following established refinement strategies.<sup>[11]</sup> All non-hydrogen atoms were refined anisotropically. All hydrogen atoms bound to carbon were included in the model at geometrically calculated positions and refined using a riding model. The isotropic displacement parameters of all hydrogen atoms were fixed to 1.2 times the Ueq value of the atoms they are linked to (1.5 times for methyl groups). Details of the data quality and a summary of the residual values of the refinements are listed in Tables S1-S2.

The crystals of both **2** and **17** were obtained via slow evaporation of a concentrated Et<sub>2</sub>O solution of the corresponding compound at 4 °C.

**Table S1.** Crystal data and structure refinement for **2**.

|                                 |                                       |                       |
|---------------------------------|---------------------------------------|-----------------------|
| Identification code             | rwh10_abs                             |                       |
| Empirical formula               | C <sub>20</sub> H <sub>22</sub> O     |                       |
| Formula weight                  | 278.37                                |                       |
| Temperature                     | 100.00(10) K                          |                       |
| Wavelength                      | 1.54184 Å                             |                       |
| Crystal system                  | Monoclinic                            |                       |
| Space group                     | P 1 21 1                              |                       |
| Unit cell dimensions            | a = 5.84080(10) Å                     | $\alpha$ = 90°.       |
|                                 | b = 16.7324(4) Å                      | $\beta$ = 92.485(2)°. |
|                                 | c = 7.8935(2) Å                       | $\gamma$ = 90°.       |
| Volume                          | 770.71(3) Å <sup>3</sup>              |                       |
| Z                               | 2                                     |                       |
| Density (calculated)            | 1.200 Mg/m <sup>3</sup>               |                       |
| Absorption coefficient          | 0.549 mm <sup>-1</sup>                |                       |
| F(000)                          | 300                                   |                       |
| Crystal size                    | 0.236 x 0.179 x 0.127 mm <sup>3</sup> |                       |
| Theta range for data collection | 5.287 to 70.012°.                     |                       |
| Index ranges                    | -7 ≤ h ≤ 7, -20 ≤ k ≤ 20, -9 ≤ l ≤ 9  |                       |
| Reflections collected           | 31128                                 |                       |
| Independent reflections         | 2923 [R(int) = 0.0252]                |                       |

|                                   |                                             |
|-----------------------------------|---------------------------------------------|
| Completeness to theta = 67.684°   | 100.0 %                                     |
| Absorption correction             | Gaussian                                    |
| Max. and min. transmission        | 1.000 and 0.563                             |
| Refinement method                 | Full-matrix least-squares on F <sup>2</sup> |
| Data / restraints / parameters    | 2923 / 1 / 192                              |
| Goodness-of-fit on F <sup>2</sup> | 1.069                                       |
| Final R indices [I>2sigma(I)]     | R1 = 0.0265, wR2 = 0.0706                   |
| R indices (all data)              | R1 = 0.0266, wR2 = 0.0715                   |
| Absolute structure parameter      | -0.04(5)                                    |
| Extinction coefficient            | n/a                                         |
| Largest diff. peak and hole       | 0.161 and -0.168 e.Å <sup>-3</sup>          |

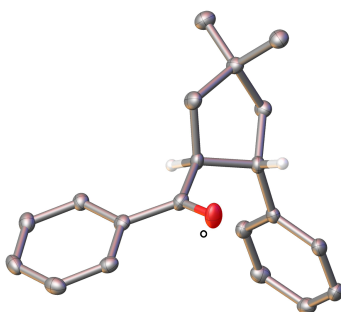

**Figure S6.** ORTEP drawing of **2** with 30% probability thermal ellipsoids. Hydrogen atoms have been omitted for clarity.

**Table S2.** Crystal data and structure refinement for **17**.

|                        |                           |                              |
|------------------------|---------------------------|------------------------------|
| Identification code    | rwh11_abs                 |                              |
| Empirical formula      | C32 H38 O2                |                              |
| Formula weight         | 454.62                    |                              |
| Temperature            | 100.00(10) K              |                              |
| Wavelength             | 1.54184 Å                 |                              |
| Crystal system         | Monoclinic                |                              |
| Space group            | P 1 21 1                  |                              |
| Unit cell dimensions   | a = 13.24067(7) Å         | $\alpha = 90^\circ$ .        |
|                        | b = 7.76255(4) Å          | $\beta = 91.3423(5)^\circ$ . |
|                        | c = 24.83830(13) Å        | $\gamma = 90^\circ$ .        |
| Volume                 | 2552.21(2) Å <sup>3</sup> |                              |
| Z                      | 4                         |                              |
| Density (calculated)   | 1.183 Mg/m <sup>3</sup>   |                              |
| Absorption coefficient | 0.550 mm <sup>-1</sup>    |                              |

|                                   |                                                             |
|-----------------------------------|-------------------------------------------------------------|
| F(000)                            | 984                                                         |
| Crystal size                      | 0.168 x 0.099 x 0.05 mm <sup>3</sup>                        |
| Theta range for data collection   | 1.779 to 70.065°.                                           |
| Index ranges                      | -16<= <i>h</i> <=16, -9<= <i>k</i> <=9, -30<= <i>l</i> <=30 |
| Reflections collected             | 94575                                                       |
| Independent reflections           | 9697 [R(int) = 0.0338]                                      |
| Completeness to theta = 67.684°   | 100.0 %                                                     |
| Absorption correction             | Gaussian                                                    |
| Max. and min. transmission        | 1.000 and 0.851                                             |
| Refinement method                 | Full-matrix least-squares on F <sup>2</sup>                 |
| Data / restraints / parameters    | 9697 / 1 / 619                                              |
| Goodness-of-fit on F <sup>2</sup> | 1.027                                                       |
| Final R indices [I>2sigma(I)]     | R1 = 0.0315, wR2 = 0.0822                                   |
| R indices (all data)              | R1 = 0.0318, wR2 = 0.0824                                   |
| Absolute structure parameter      | 0.00(5)                                                     |
| Extinction coefficient            | n/a                                                         |
| Largest diff. peak and hole       | 0.263 and -0.181 e.Å <sup>-3</sup>                          |

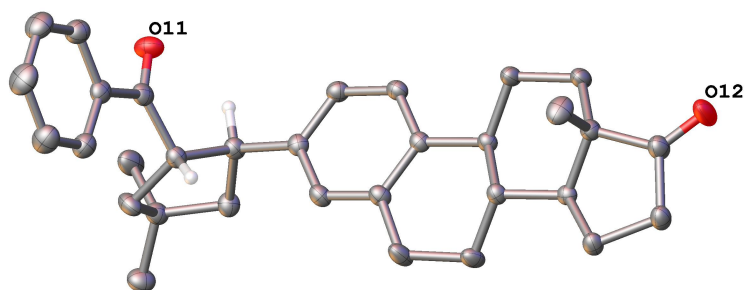

**Figure S7.** ORTEP drawing of **17** with 30% probability thermal ellipsoids. Hydrogen atoms have been omitted for clarity.

## Section 6. References

1. Amador, A. G.; Sherbrook, E. M.; Yoon, T. P. *J. Am. Chem. Soc.* **2016**, *138*, 4722–4725.
2. Coudray, L.; de Figueiredo, R. M.; Duez, S.; Cortial, S.; Dubois, J. *J. Enzyme Inhib. Med. Chem.* **2009**, *24*, 972–985.
3. Richmond, E.; Vuković, V. D.; Moran, J. *Org. Lett.* **2018**, *20*, 574–577.
4. Chavez, D. E.; Jacobsen, E. N. *Org. Synth.* **2005**, *11*, 498–505.
5. Choudhary, N. F.; Hitchcock, P. B.; Leigh, G. J. *Inorg. Chim. Acta* **2000**, *306*, 24–29.
6. Sono, M.; Hanamura, S.; Furumaki, M.; Murai, H.; Tori, M. *Org. Lett.* **2011**, *13*, 5720–5723.
7. Hao, W.; Wu, X.; Sun, J. Z.; Siu, J. C.; MacMillan, S. N.; Lin, S. *J. Am. Chem. Soc.* **2017**, *139*, 12141–12144.
8. CrysAlisPro; Rigaku OD, The Woodlands, TX, 2015.
9. Sheldrick, G. M. *Acta Crystallogr.* **2015**, *A71*, 3–8.
10. Sheldrick, G. M. *Acta Crystallogr.* **2008**, *A64*, 112–122.
11. Müller, P. *Crystallogr. Rev.* **2009**, *15*, 57–83.

## Section 7. Spectral data for products

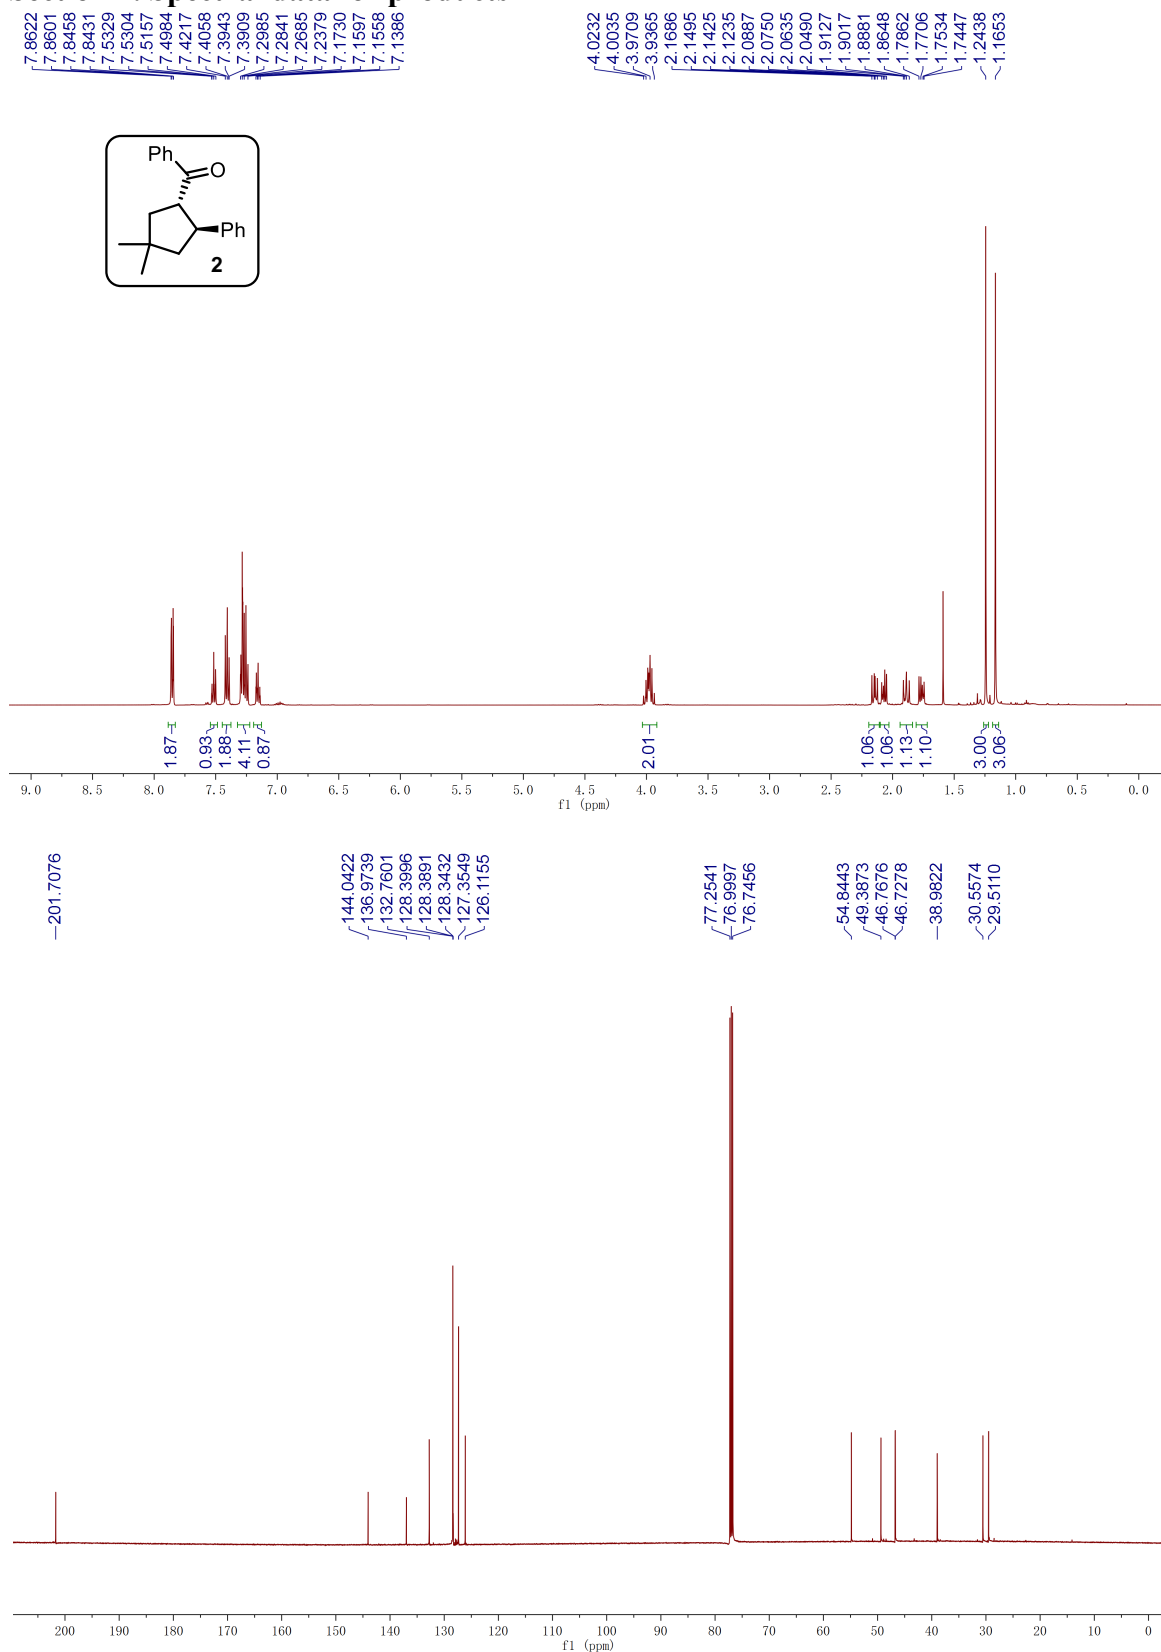

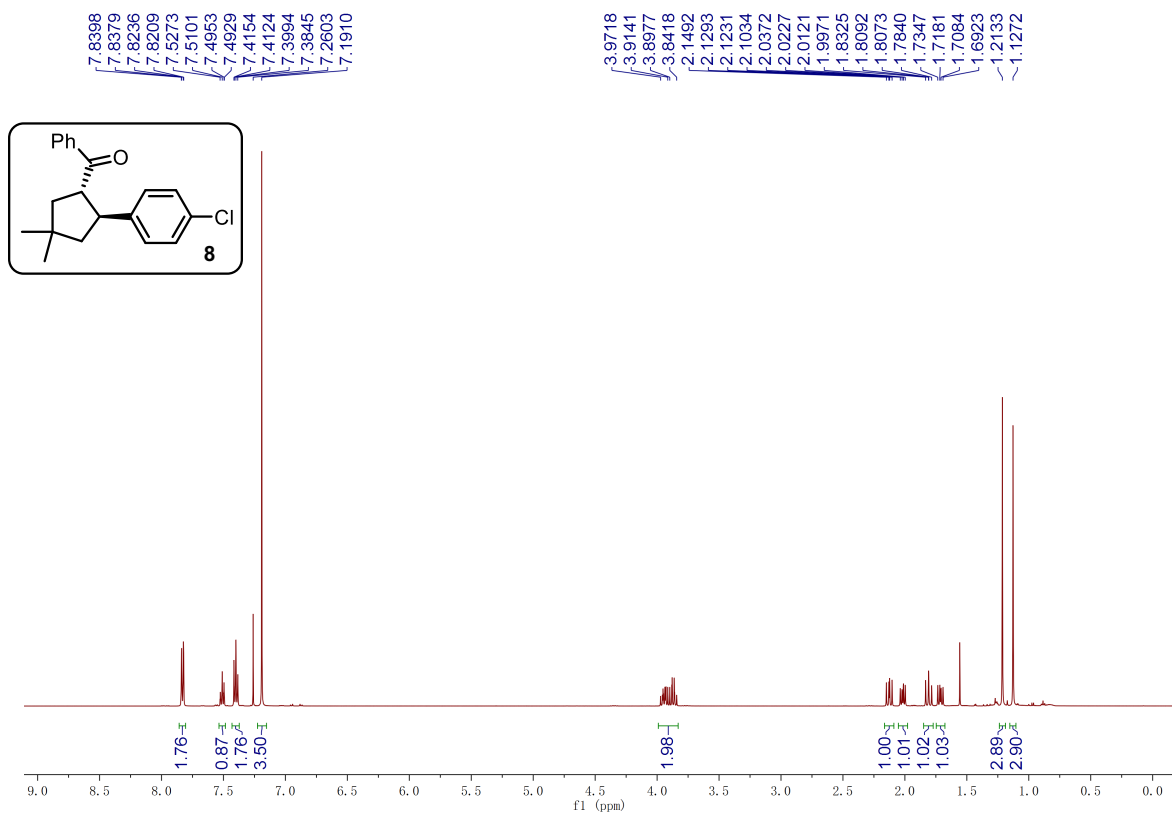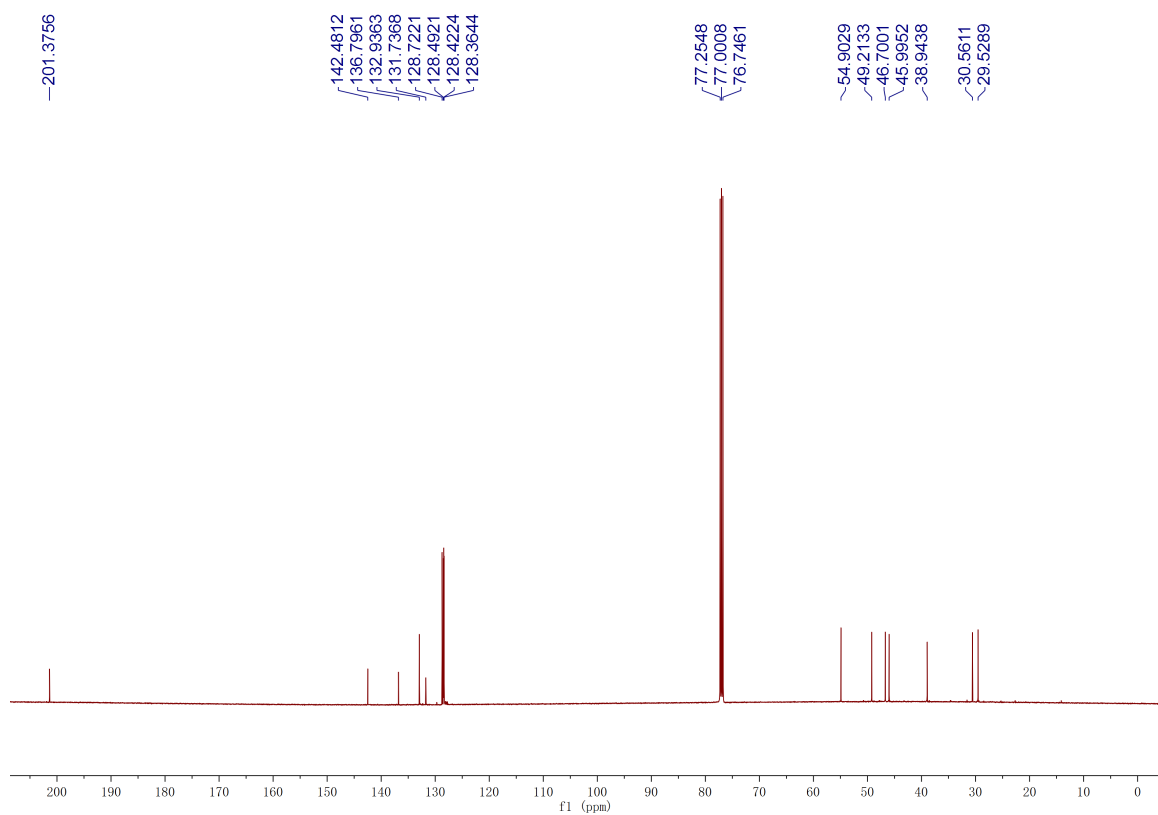



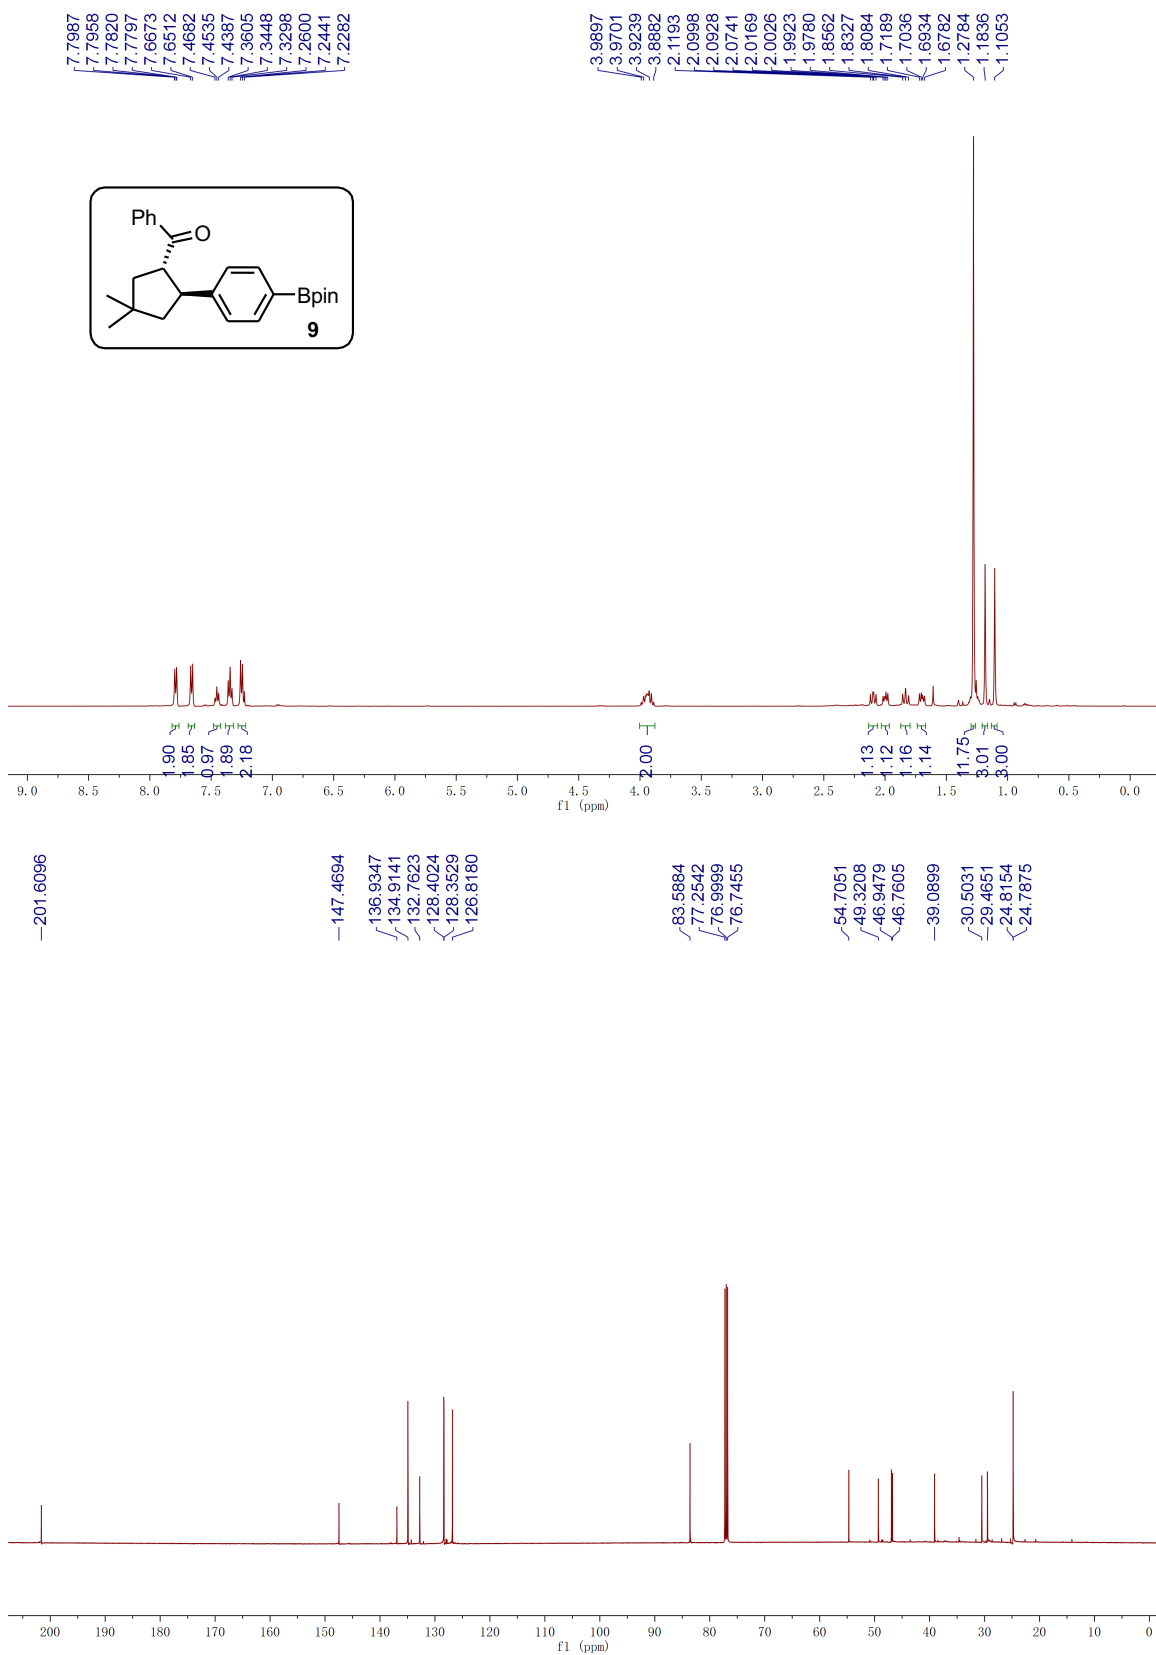

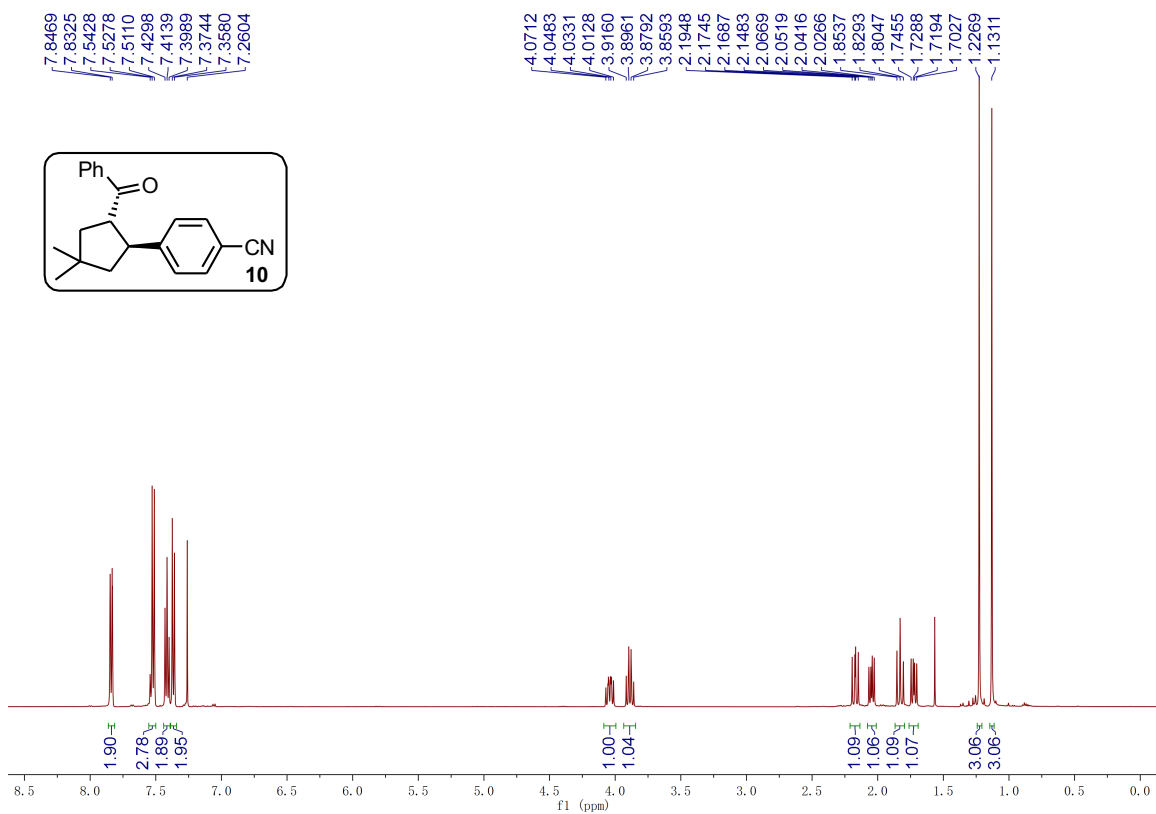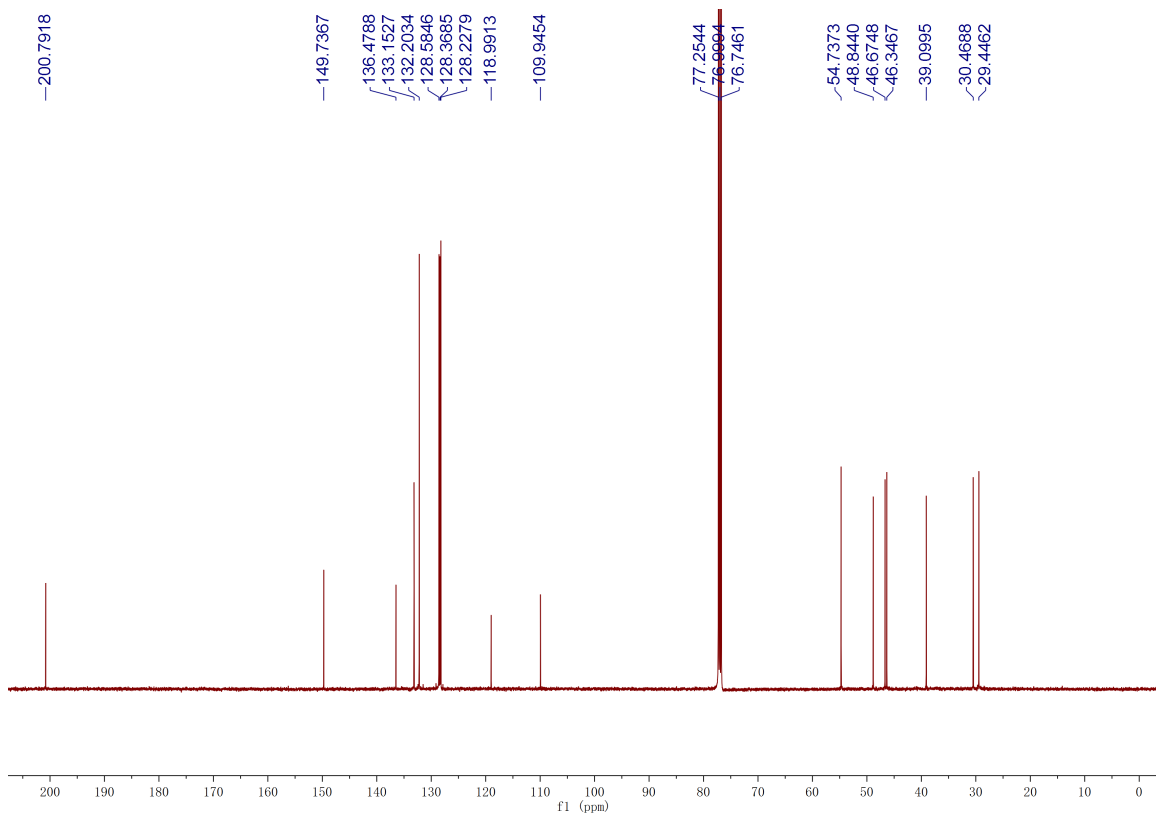

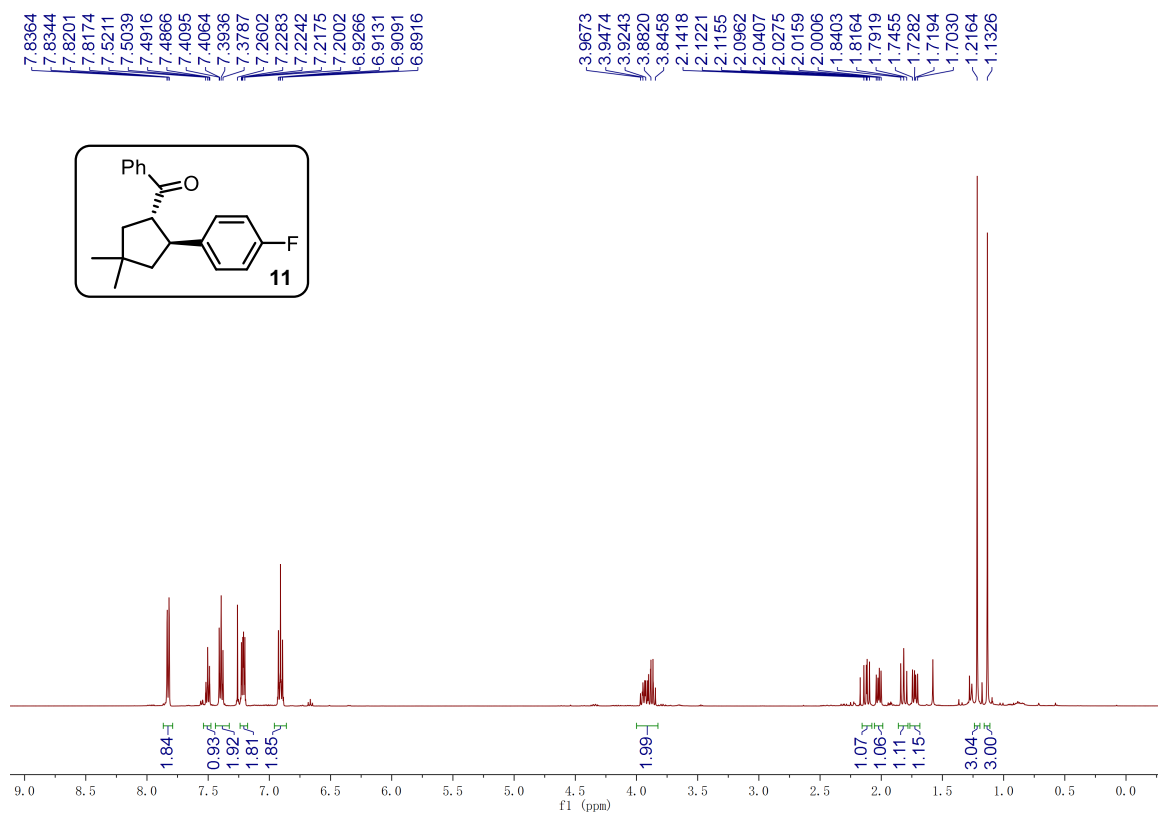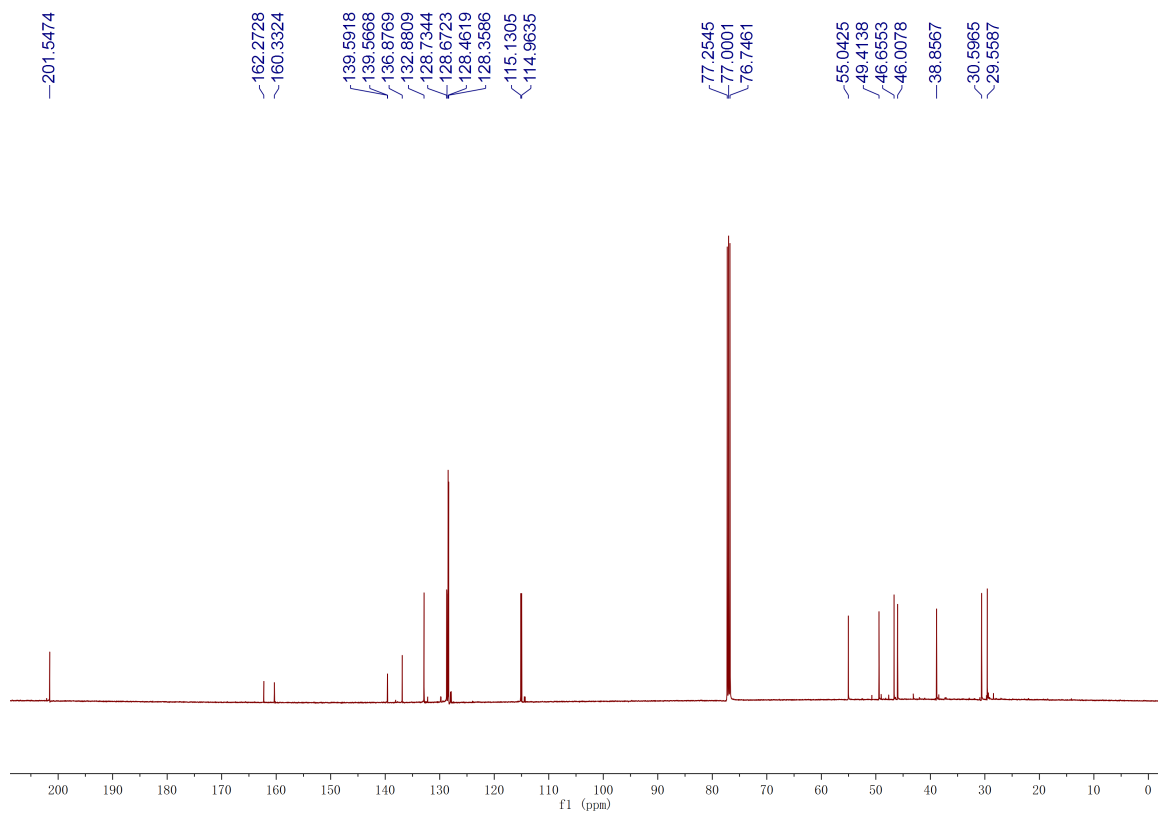

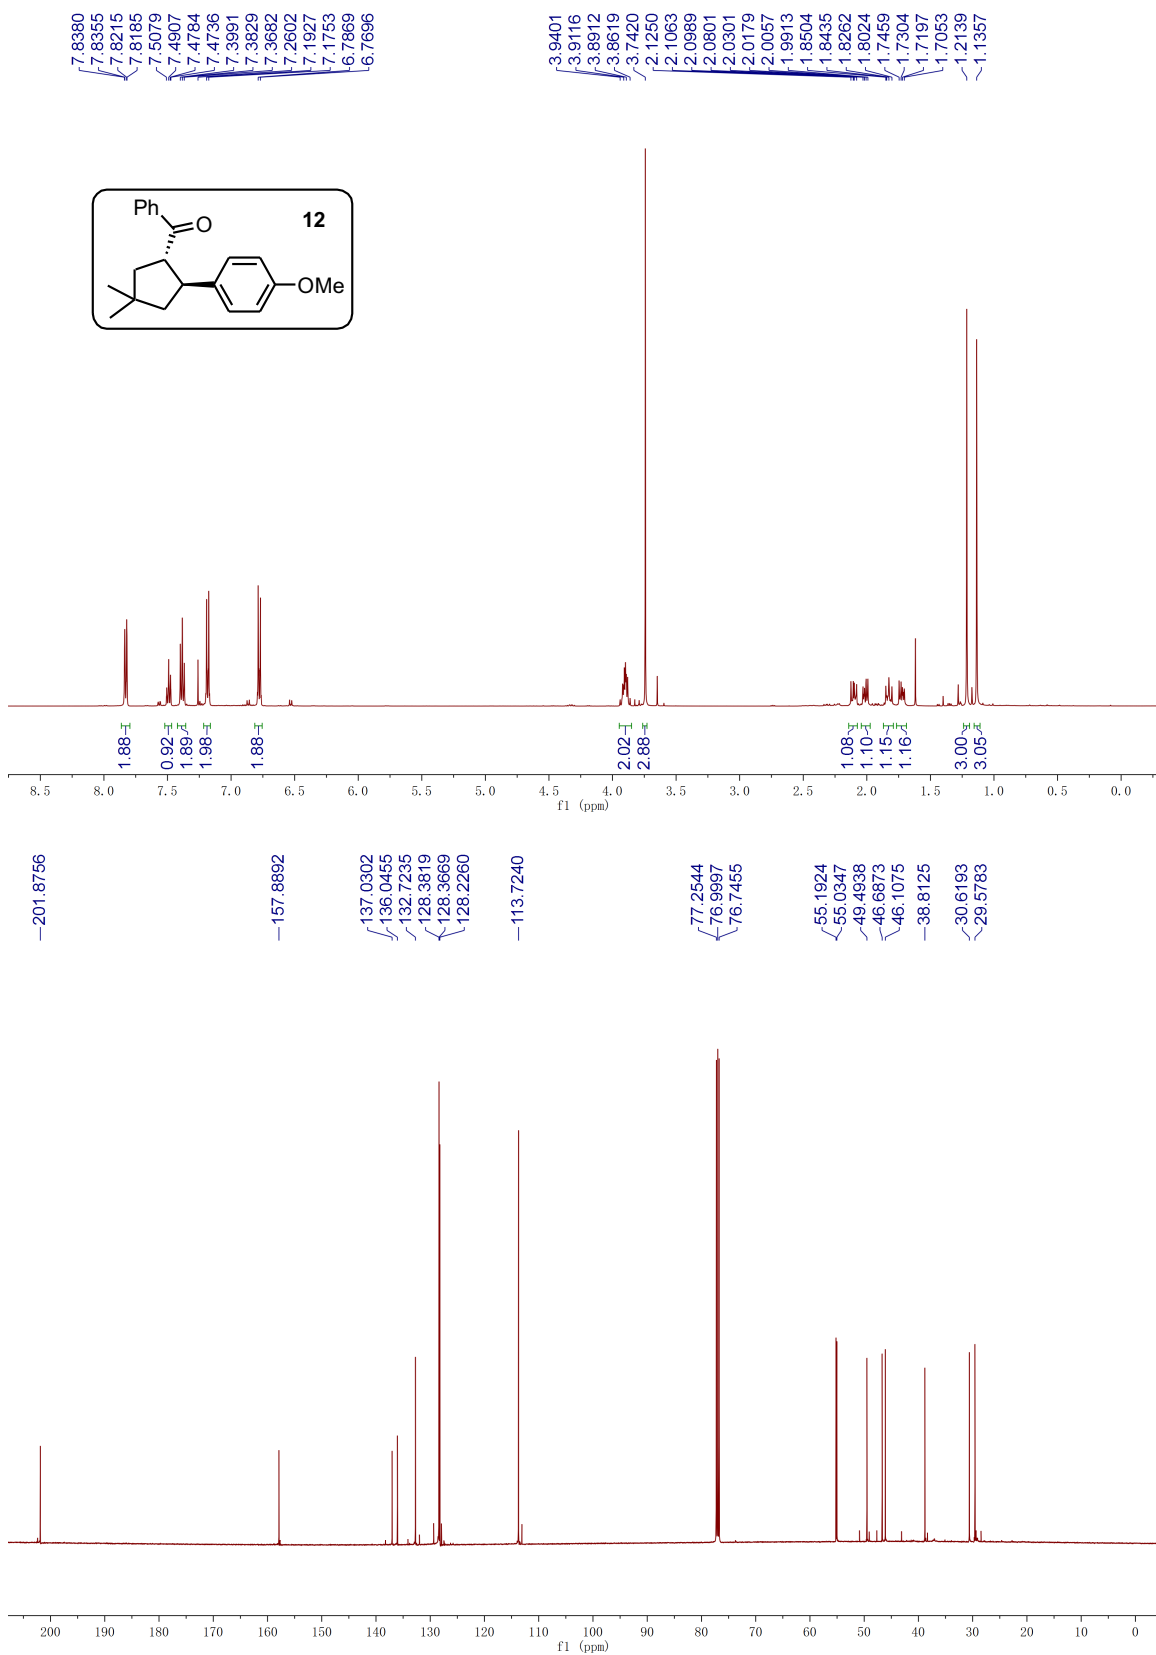

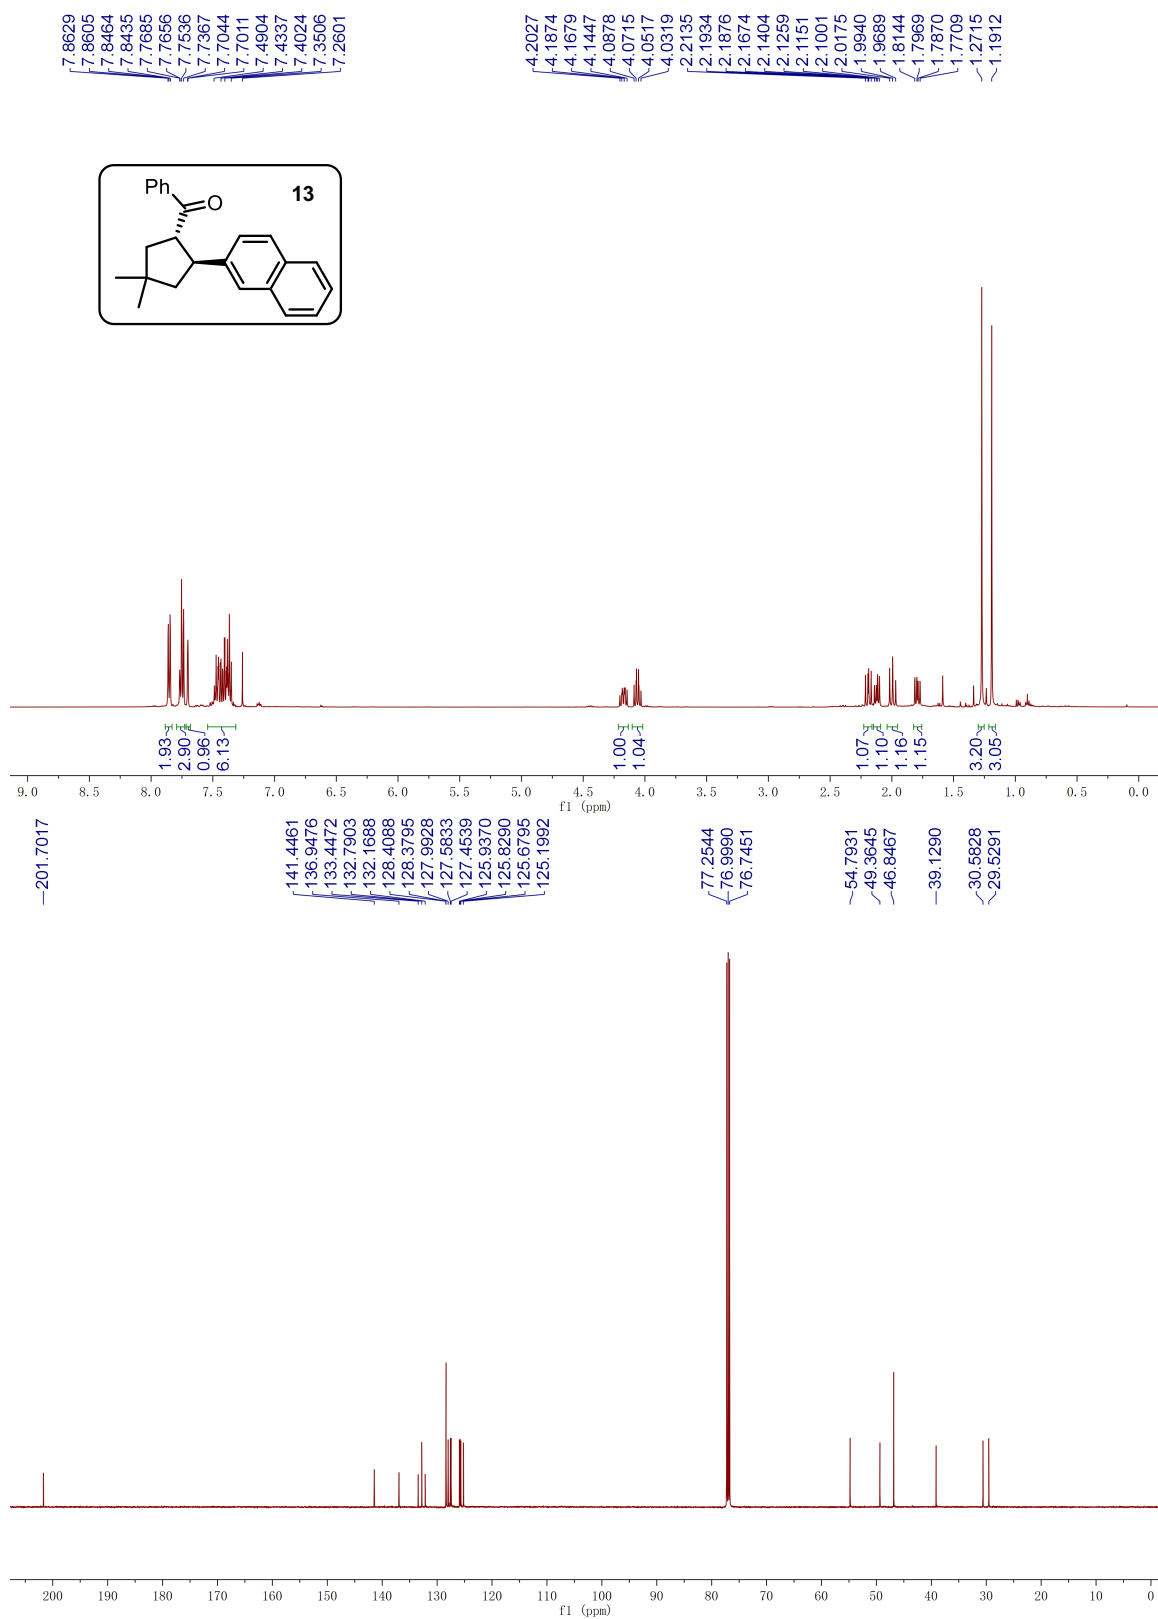

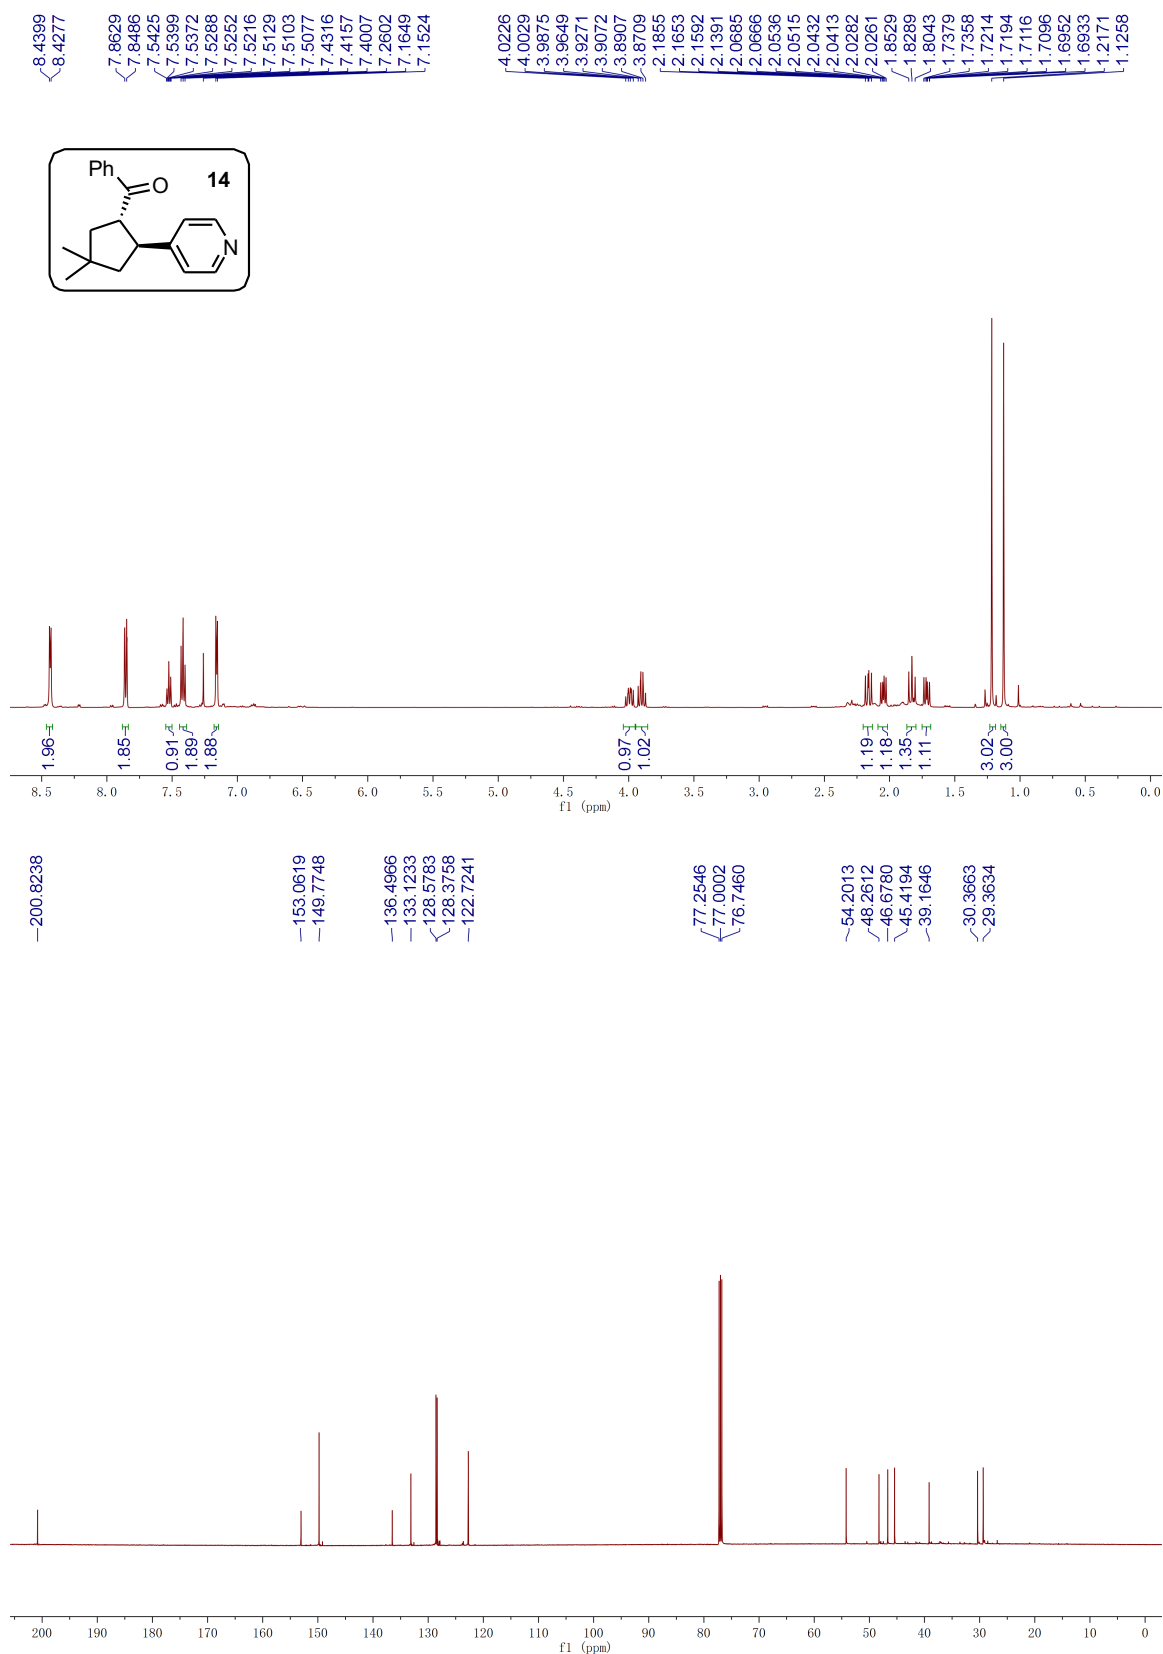

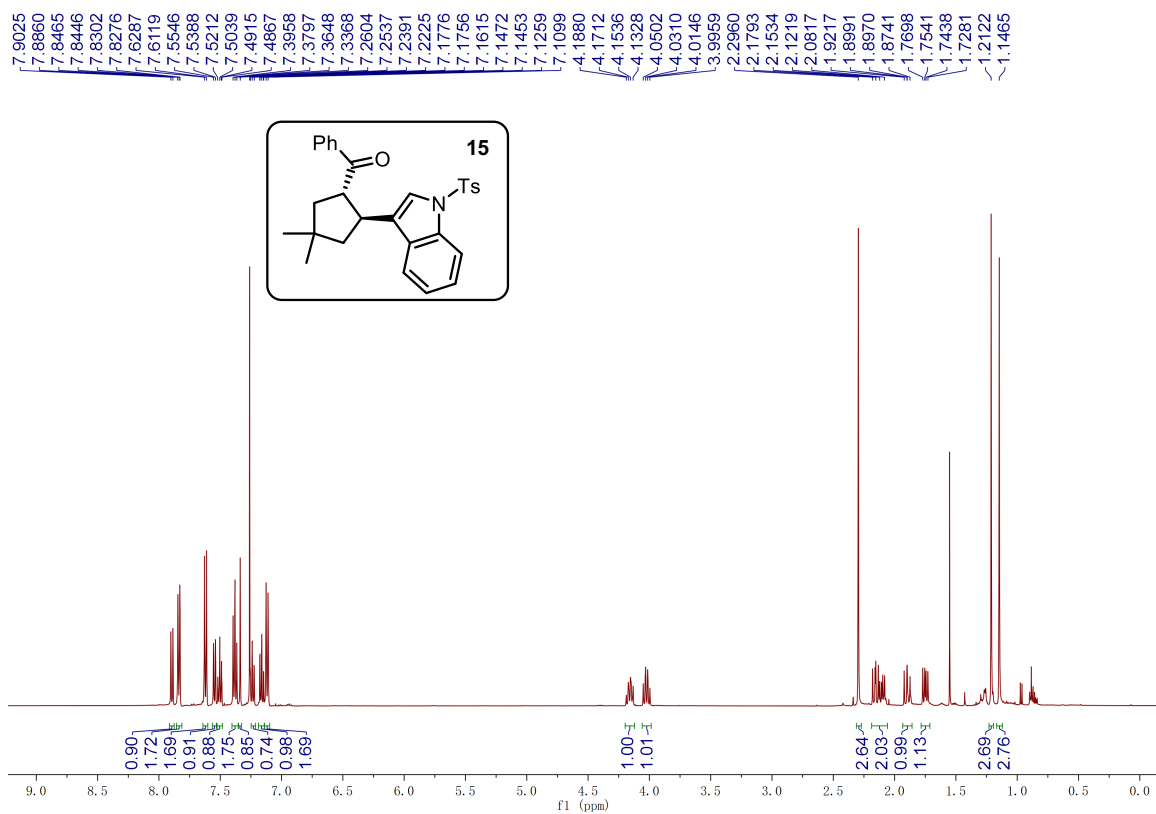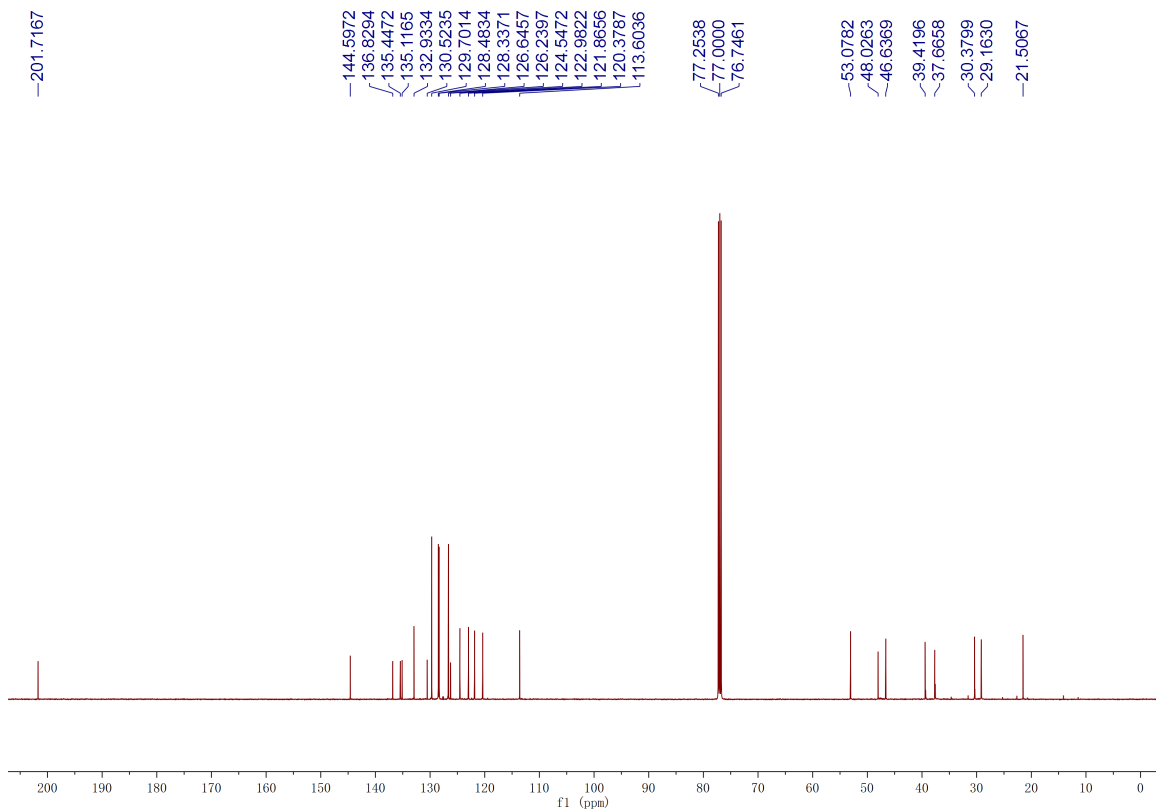

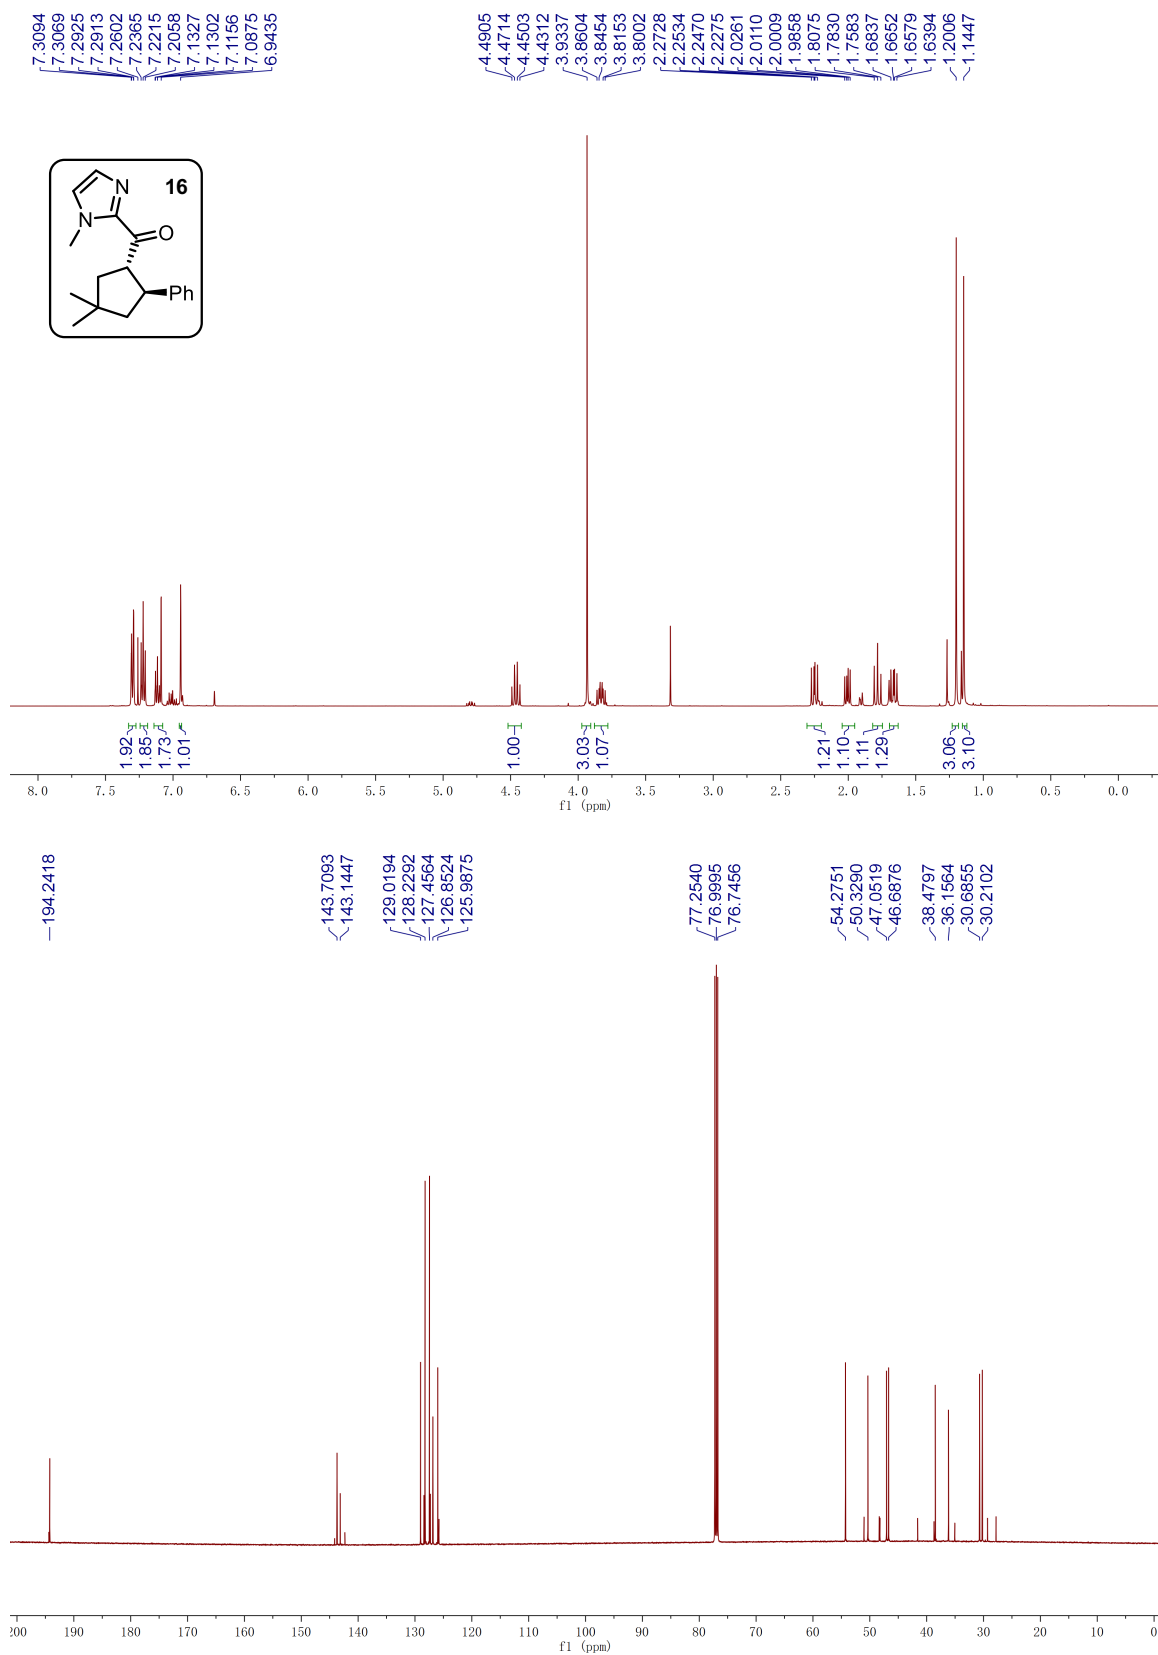



2D ROESY spectrum of **16**

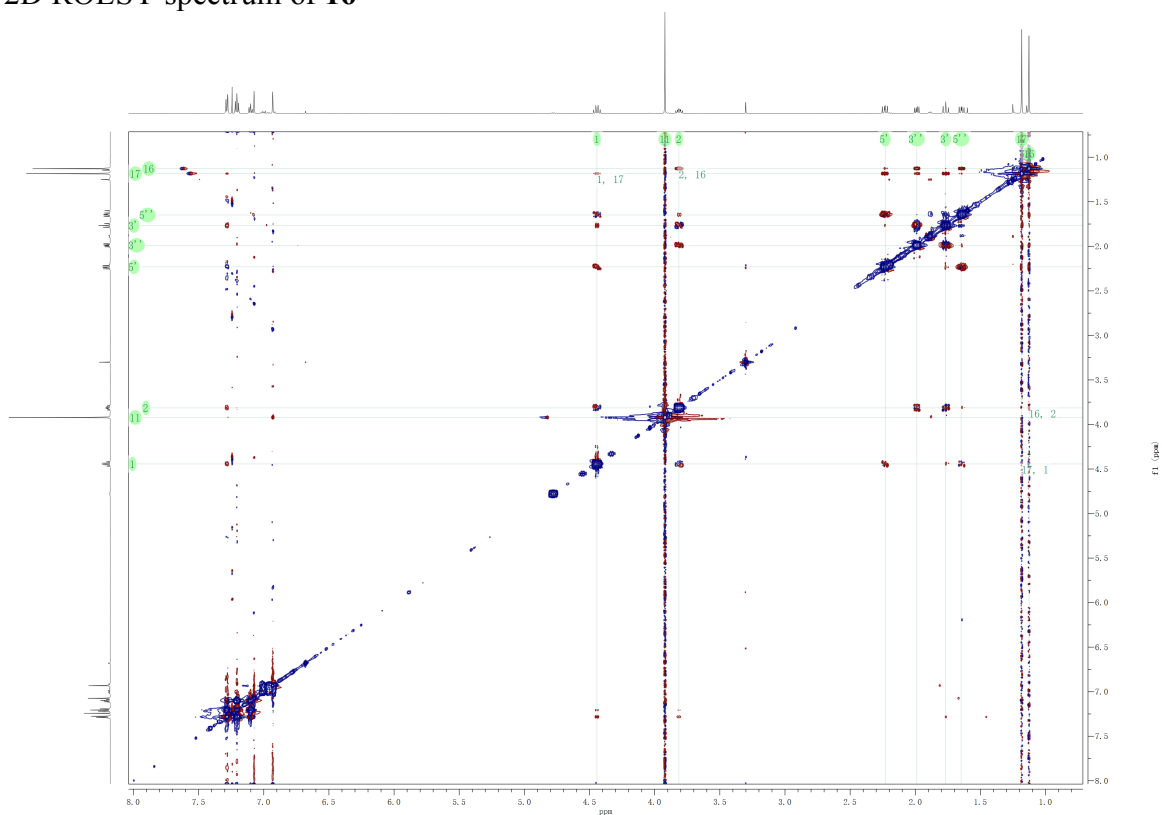

2D COSY spectrum of **16**

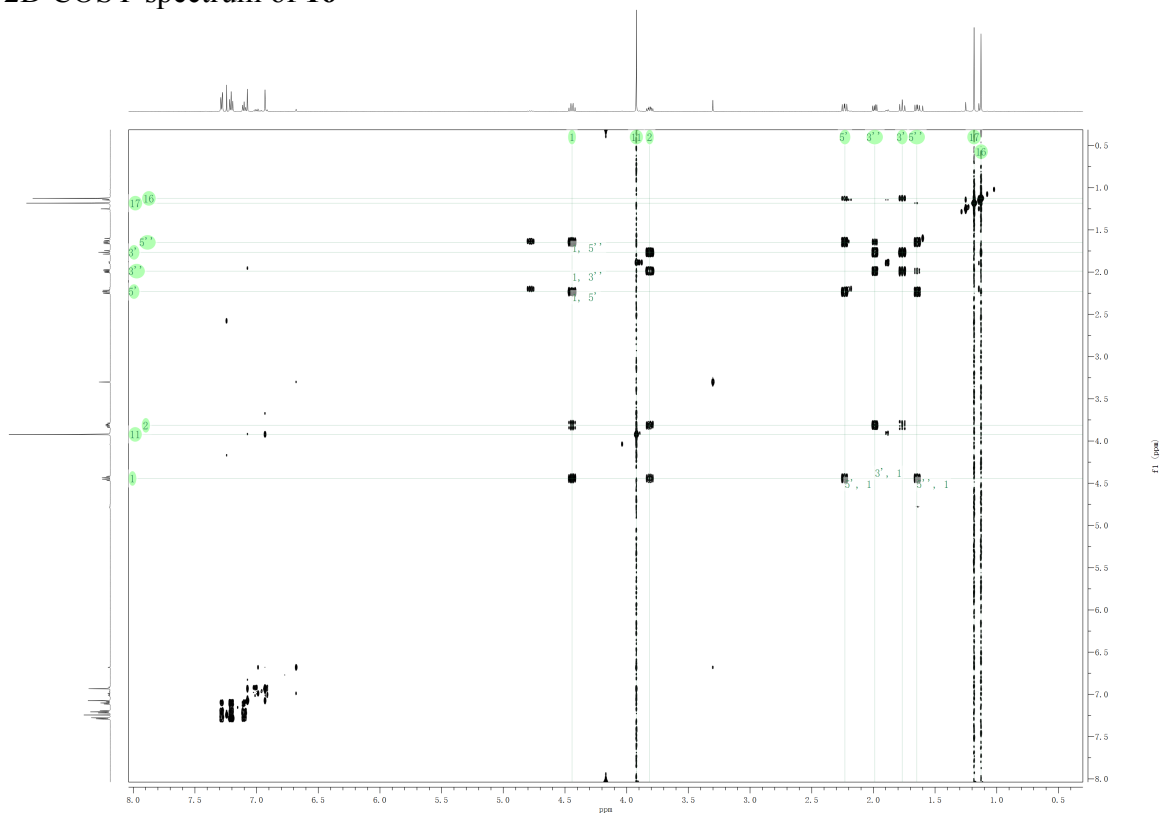

2D HSQC spectrum of **16**

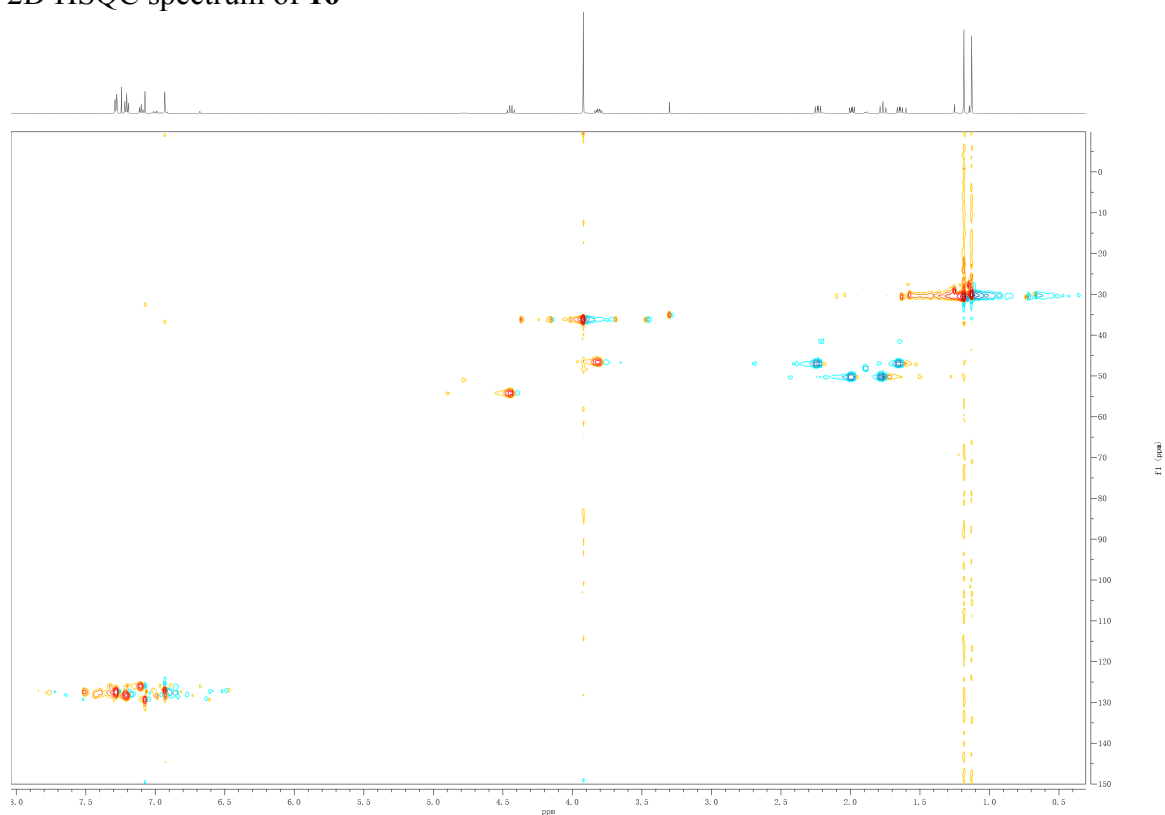

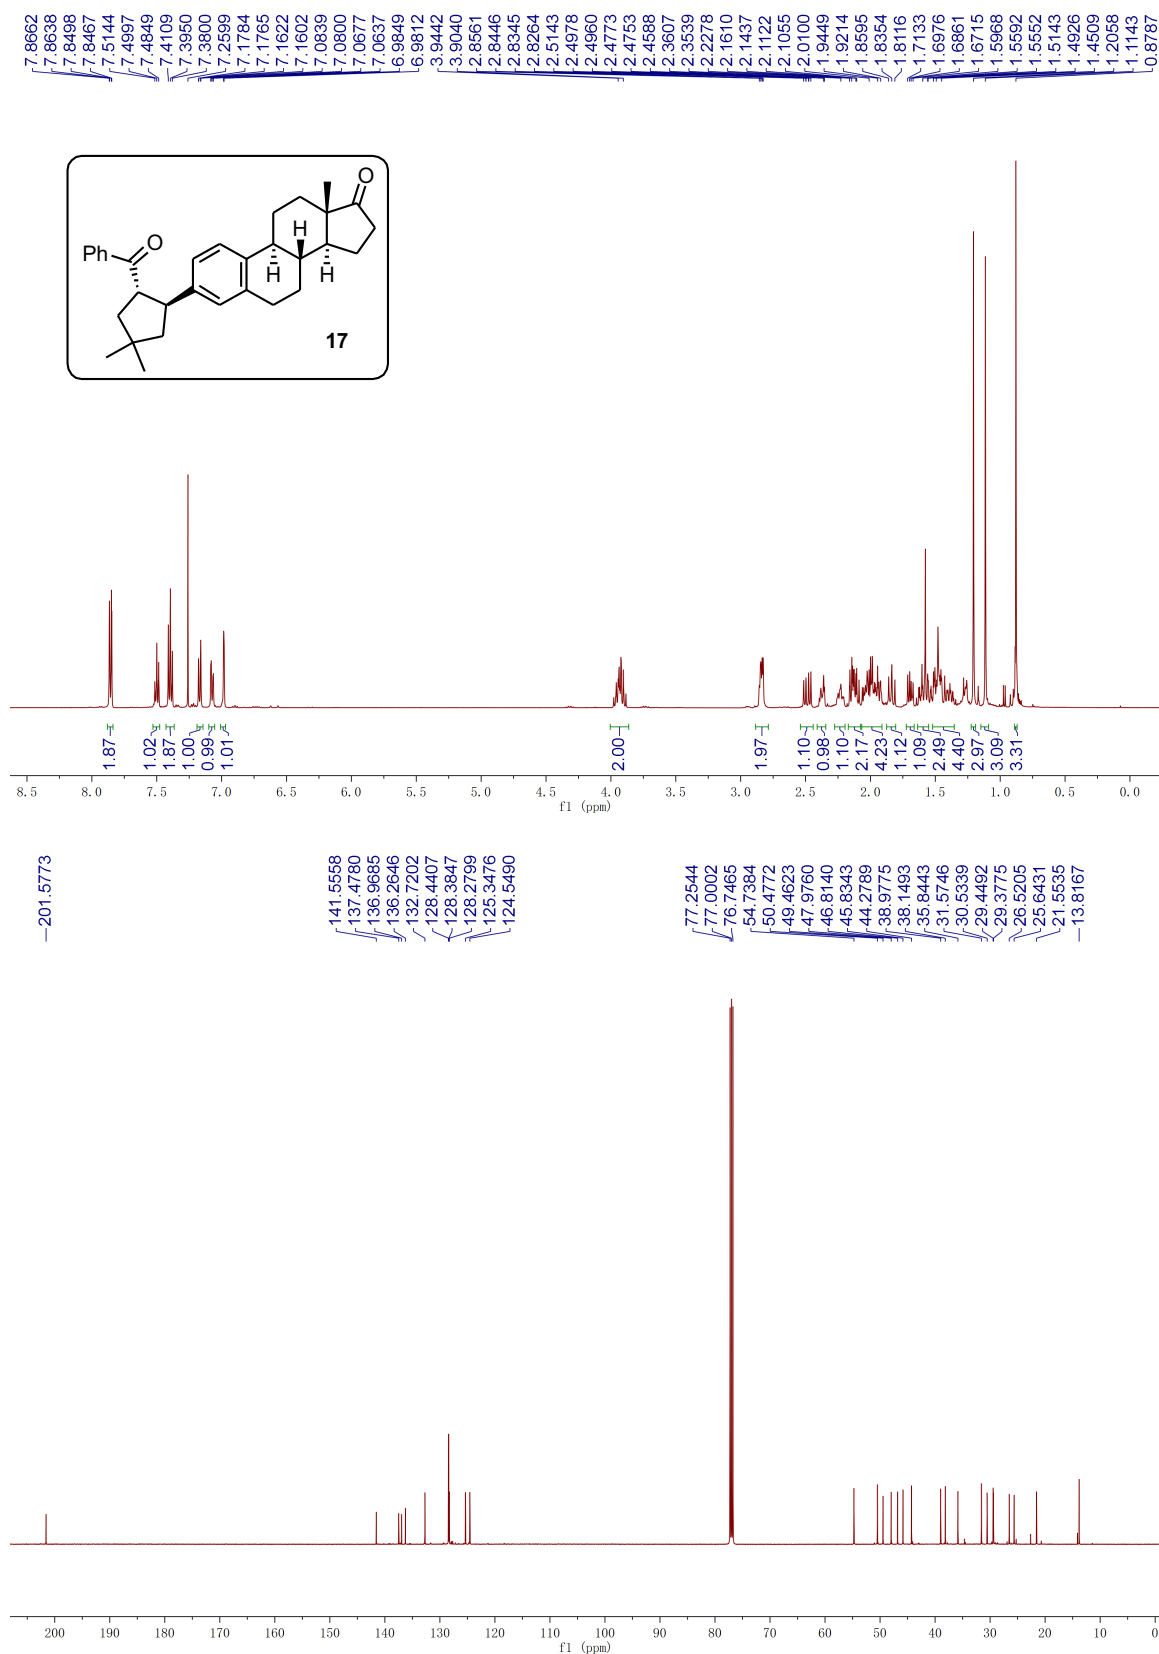

2D ROESY spectrum of **17**

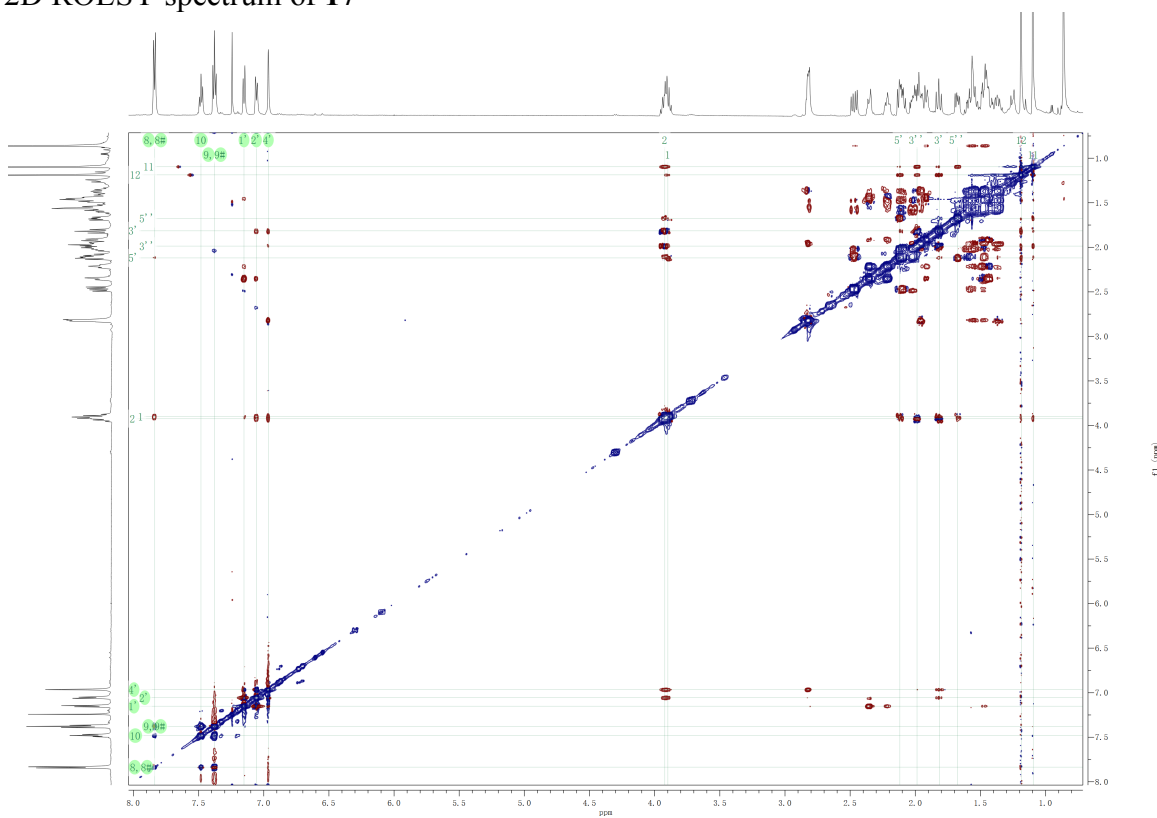

2D COSY spectrum of **17**

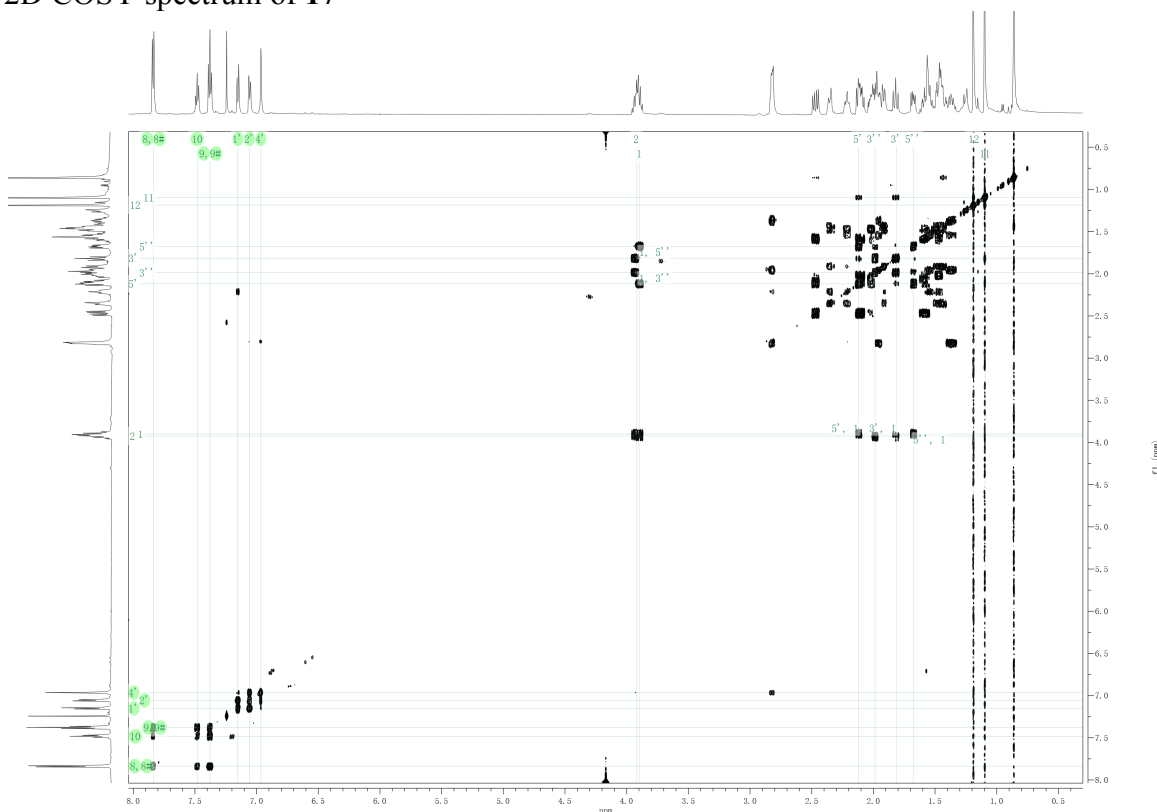

# 2D HSQC spectrum of **17**

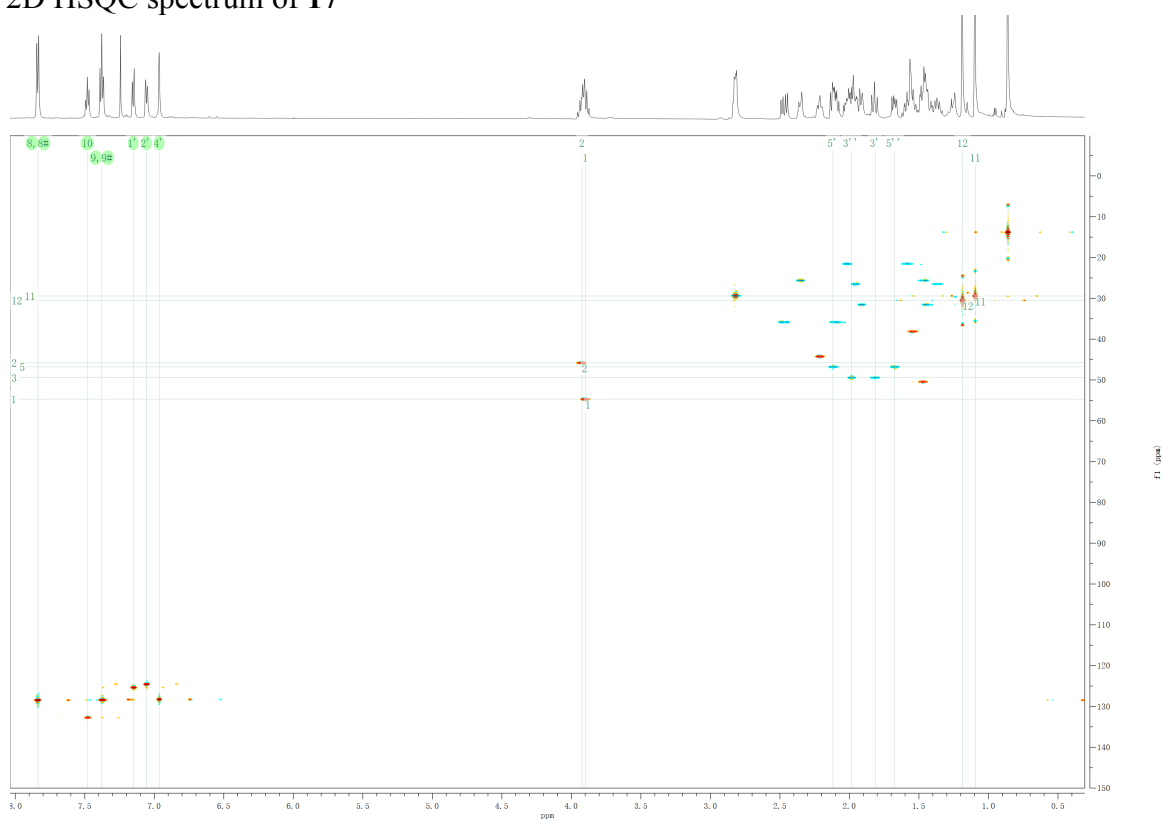

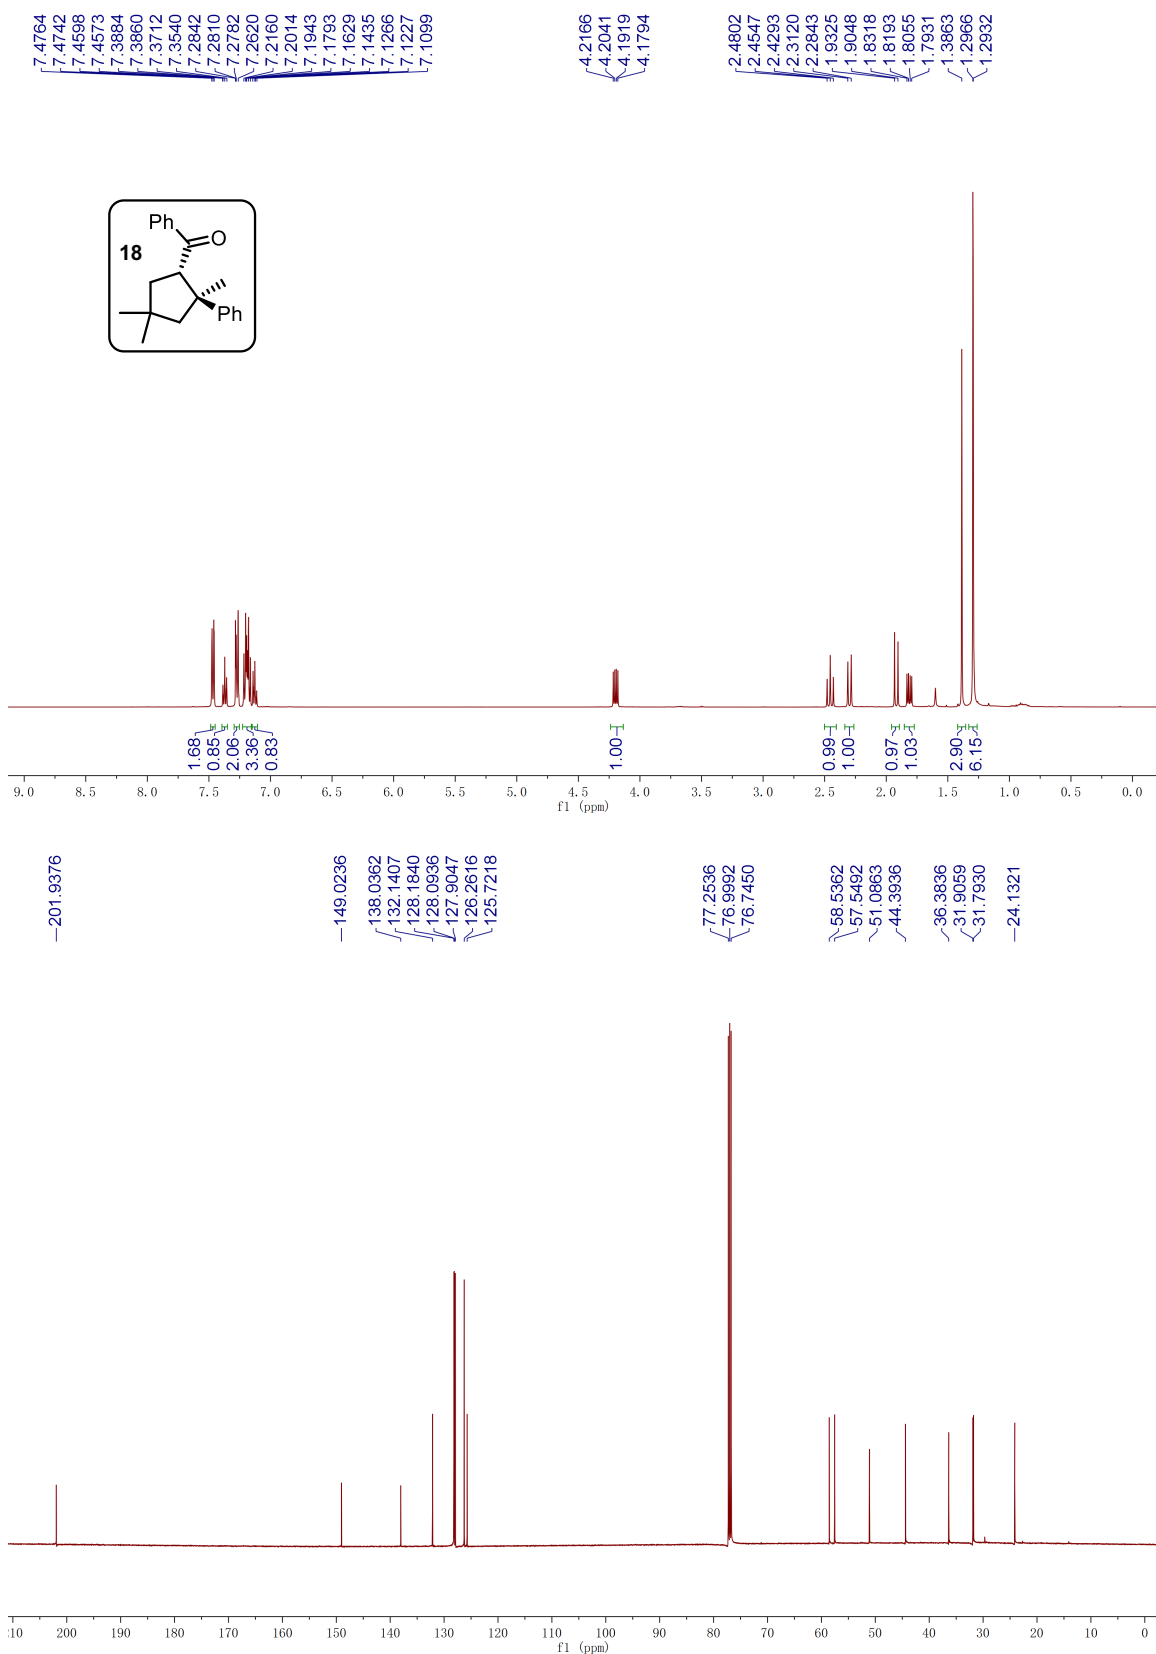

2D ROESY spectrum of **18**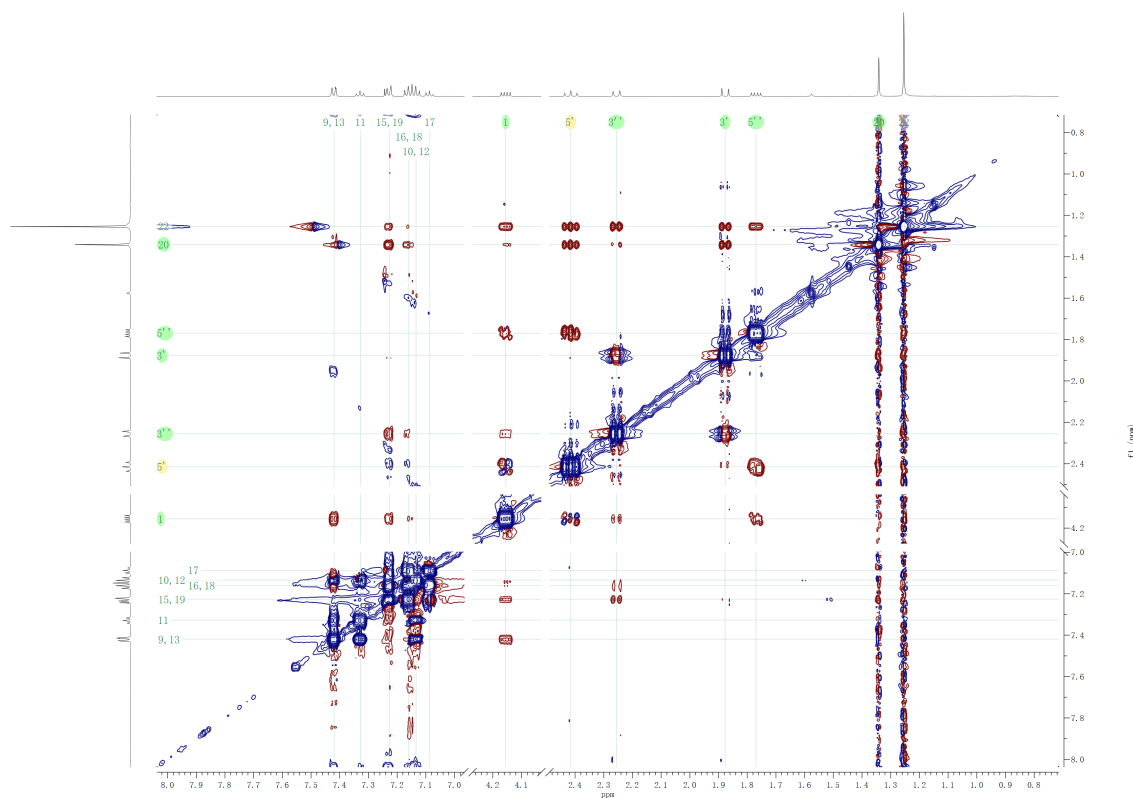2D COSY spectrum of **18**

# 2D HSQC spectrum of **18**

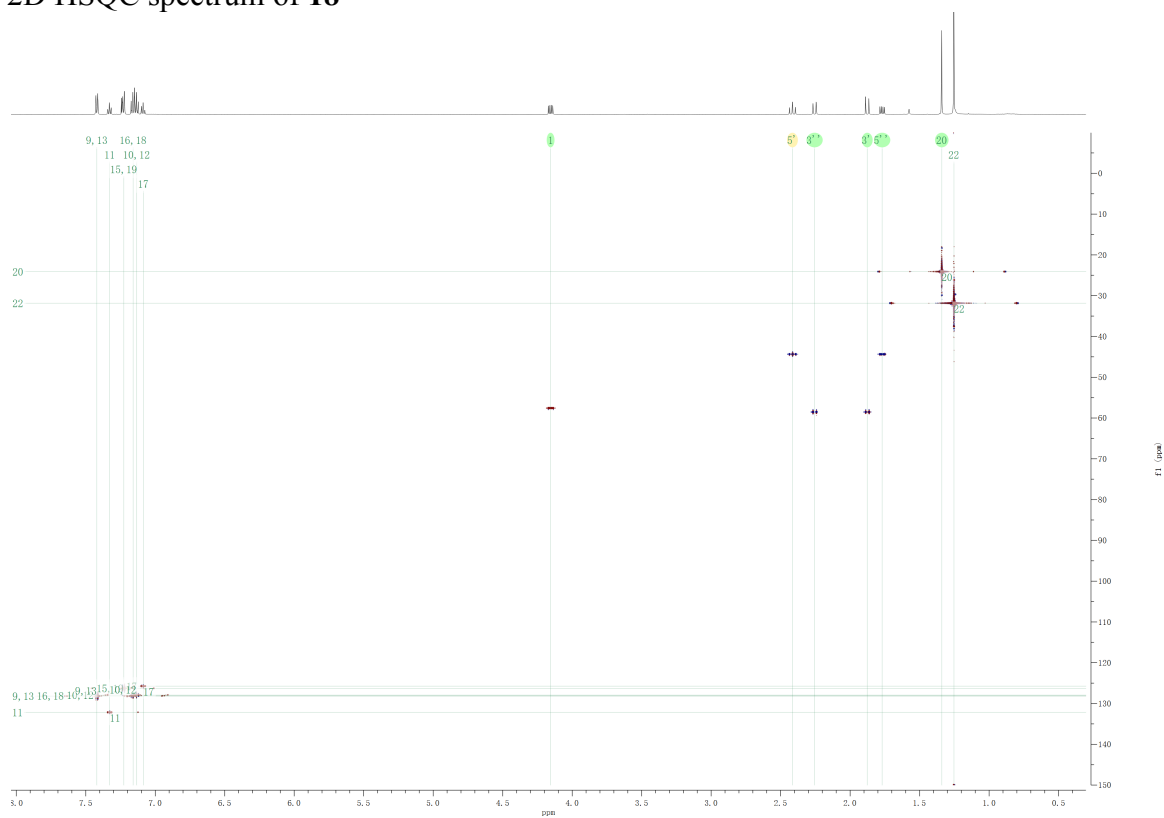



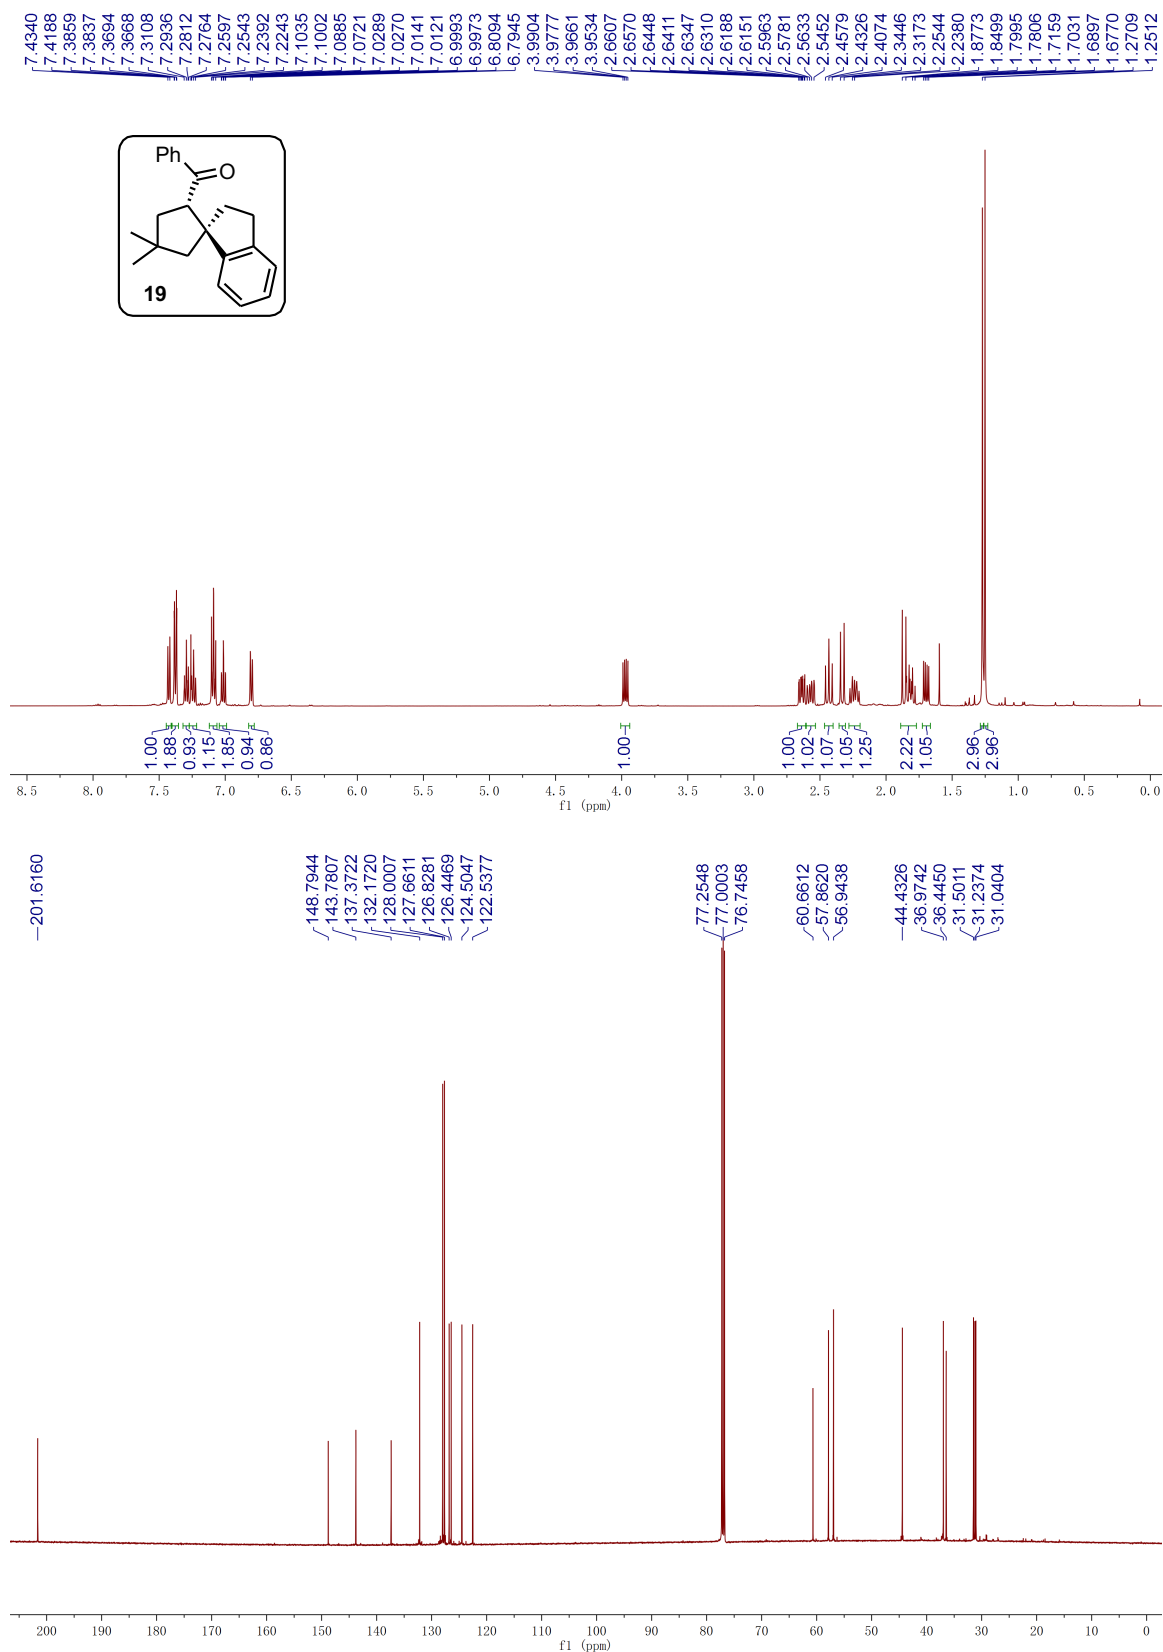

2D ROESY spectrum of **19**

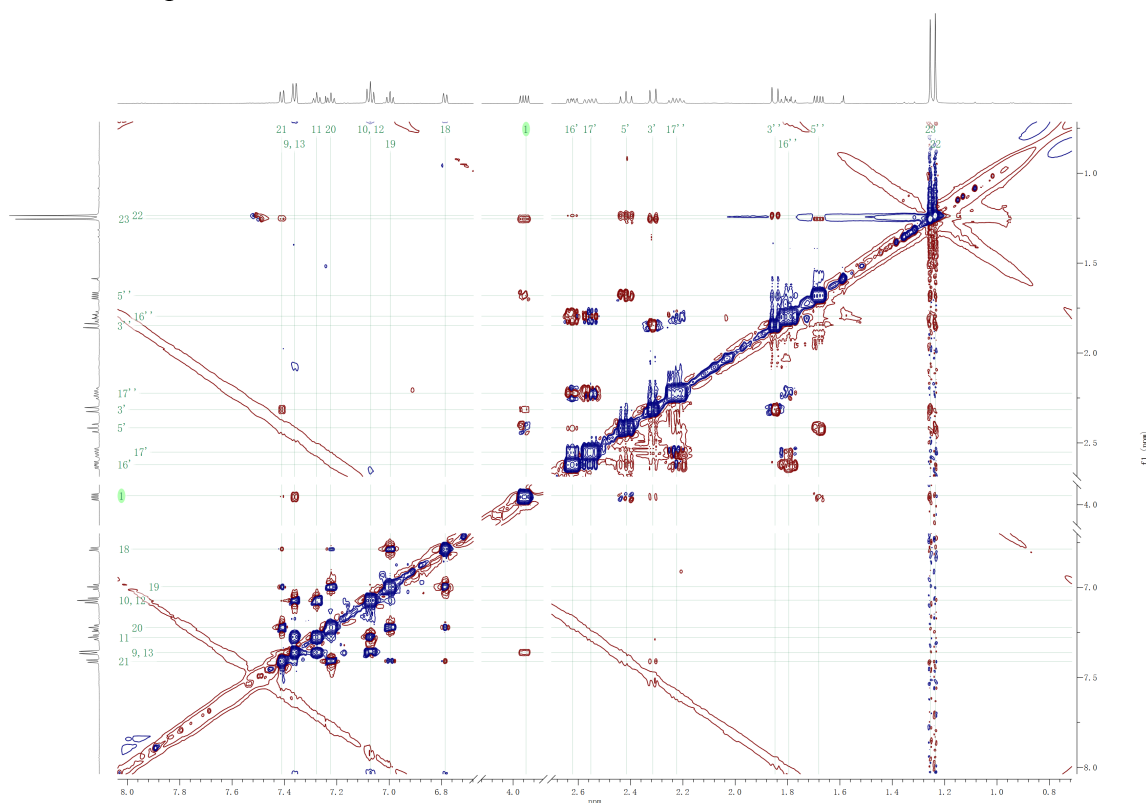

2D COSY spectrum of **19**

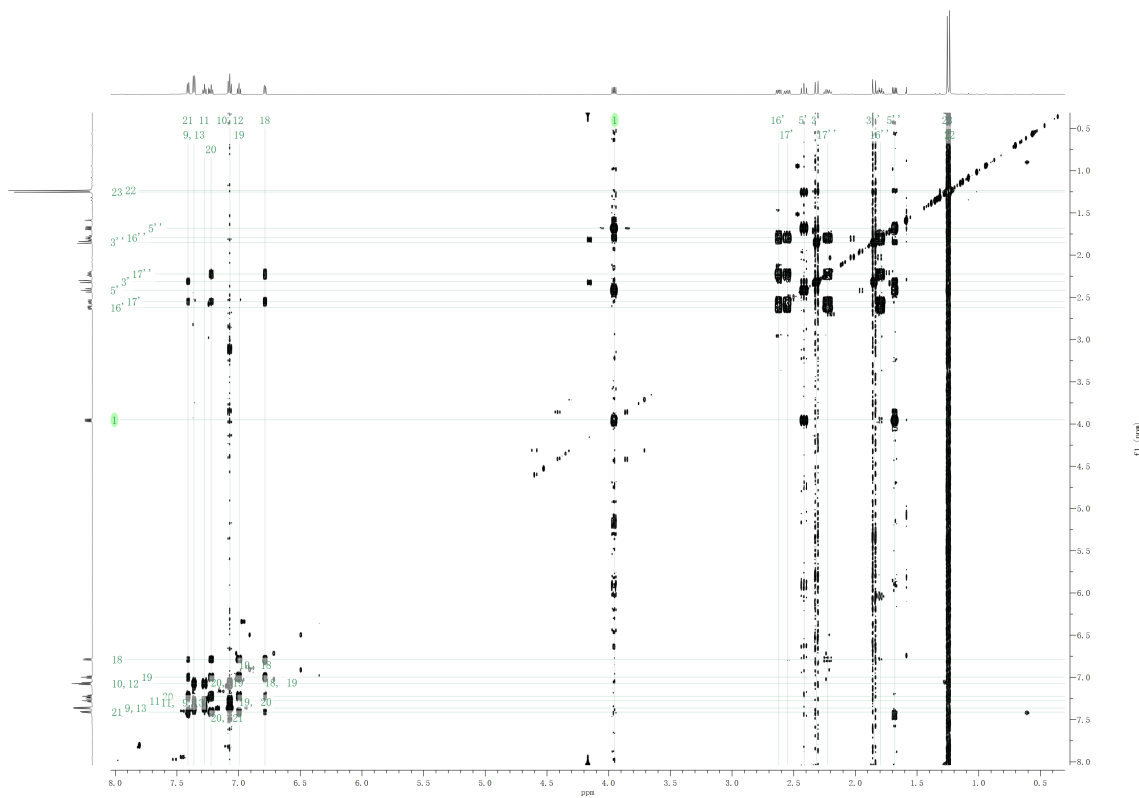

# 2D HSQC spectrum of **19**

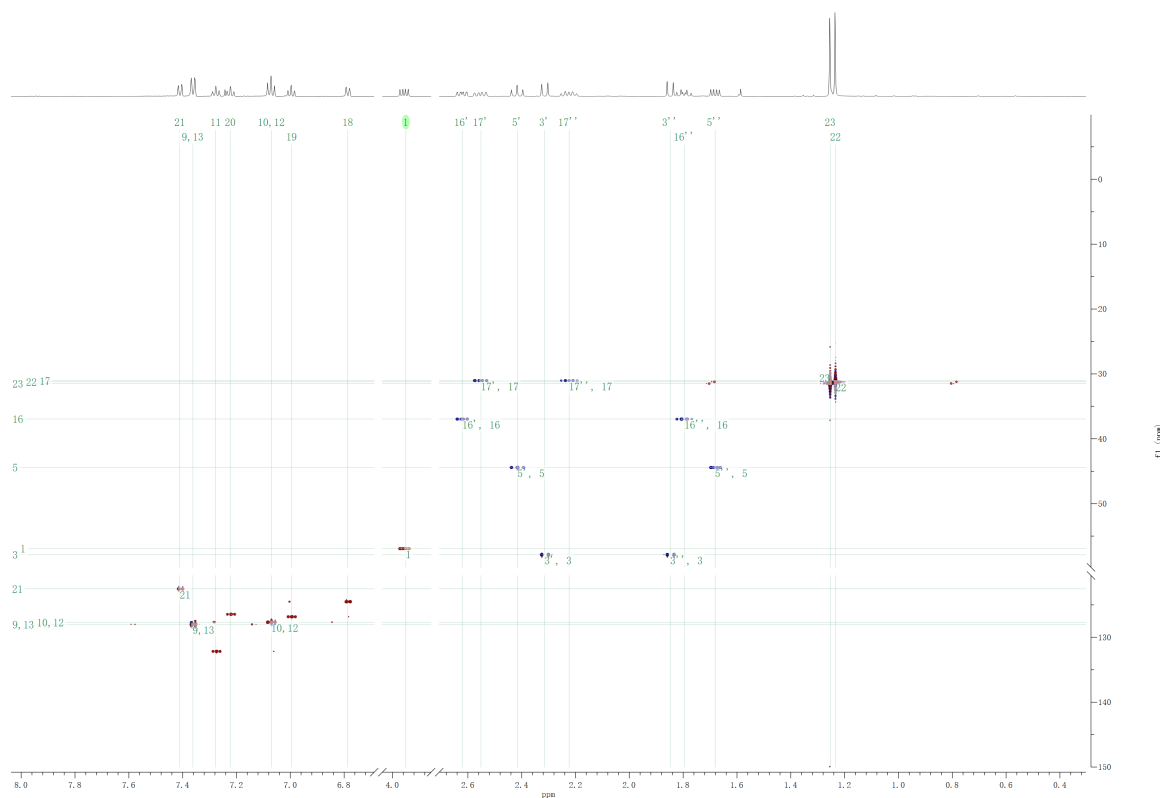

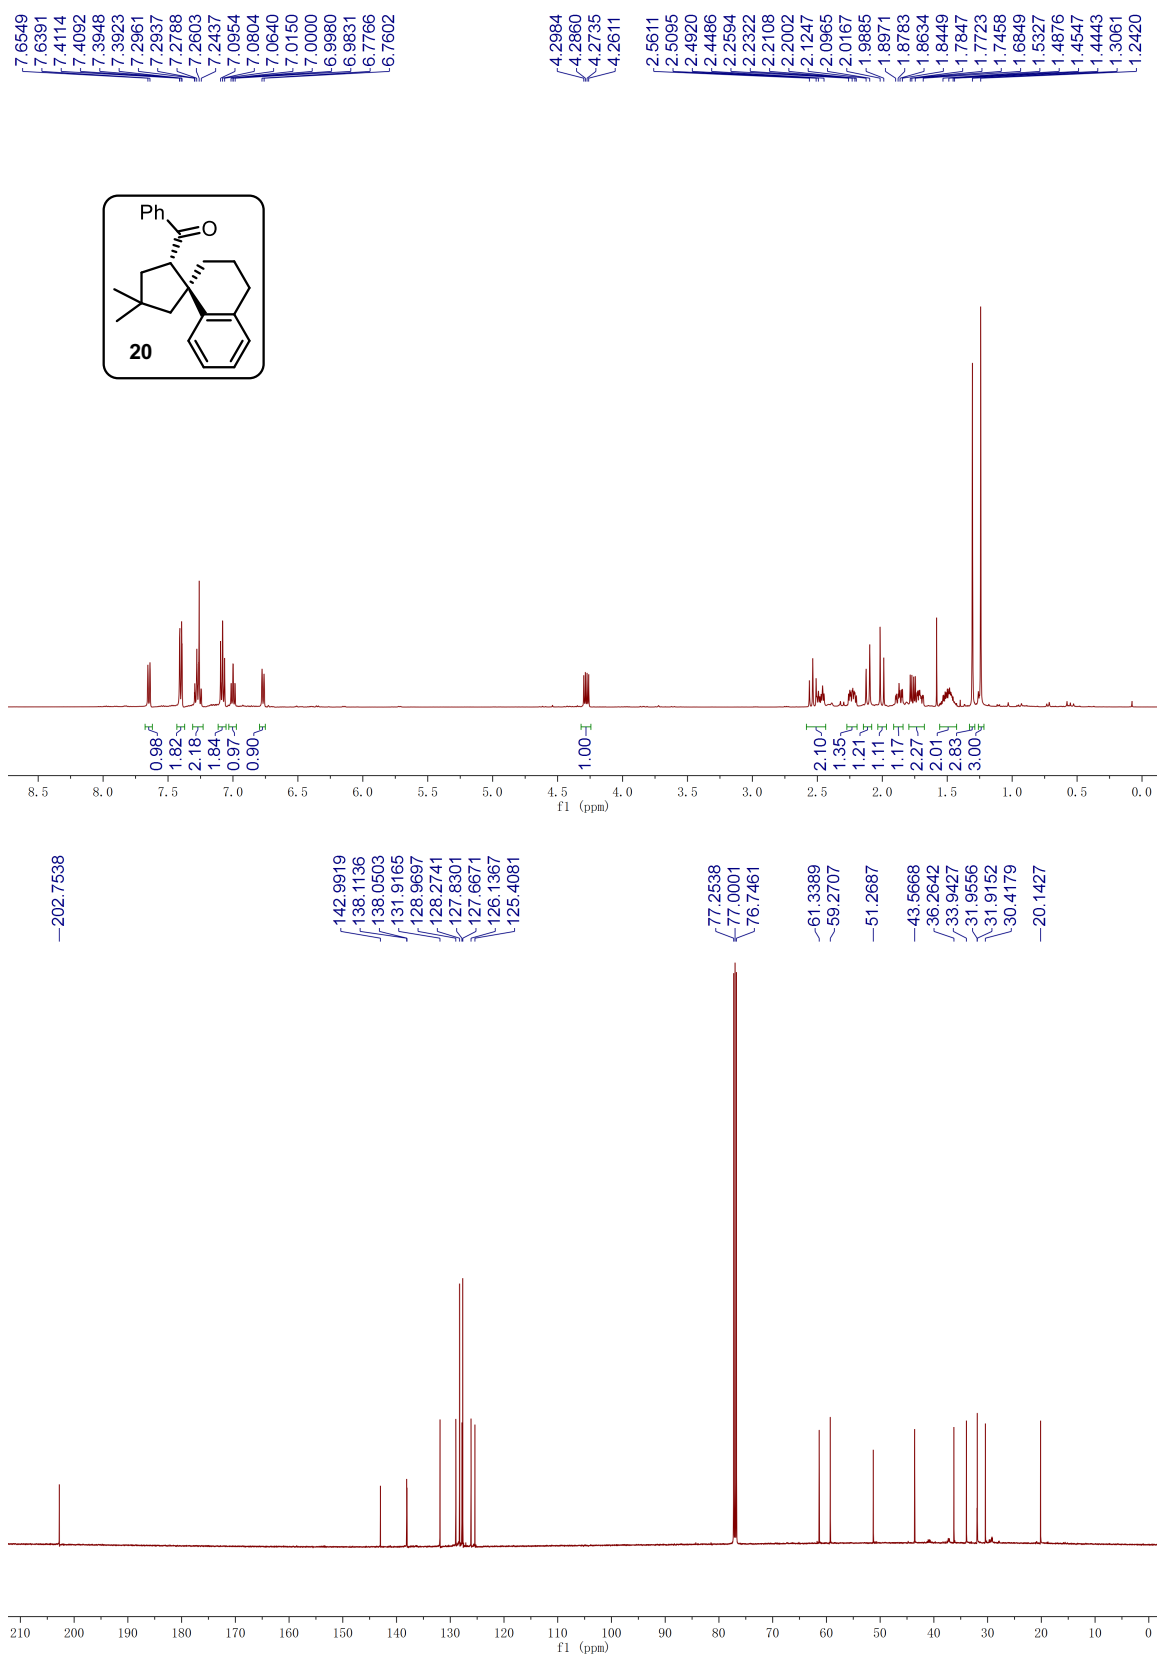

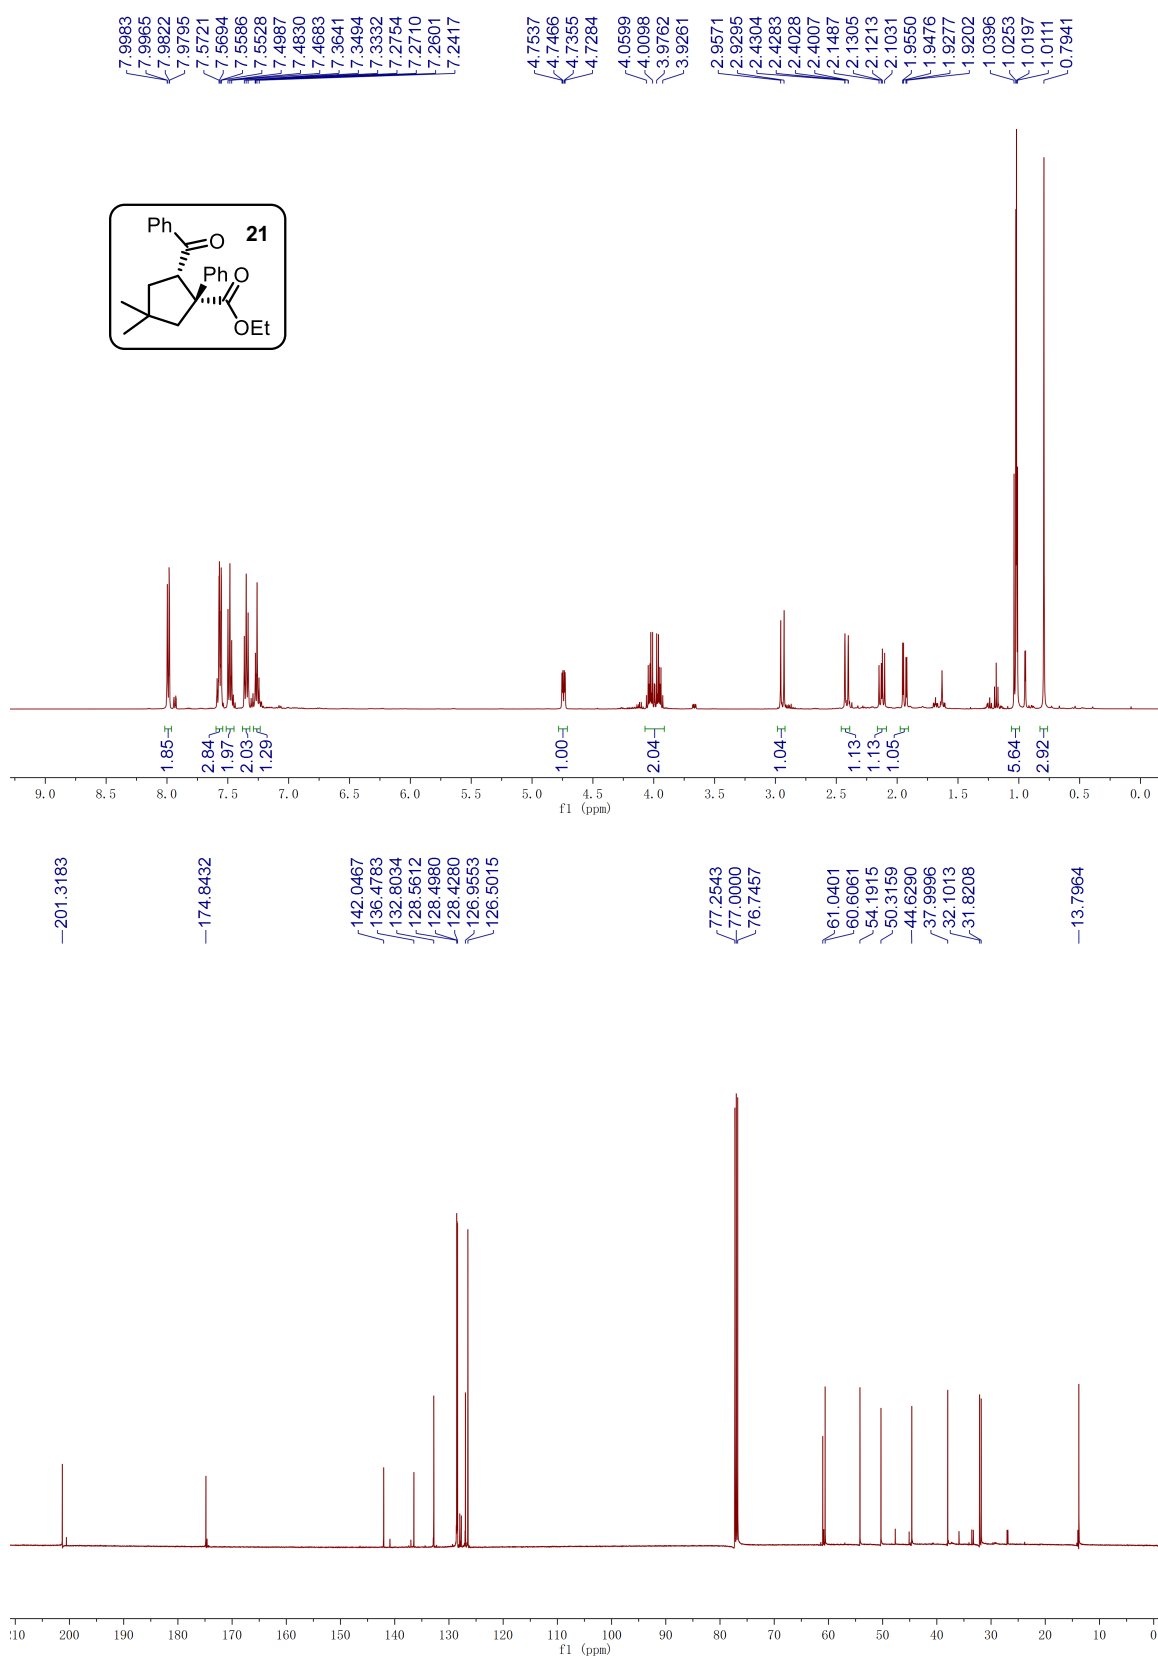

2D ROESY spectrum of **21**

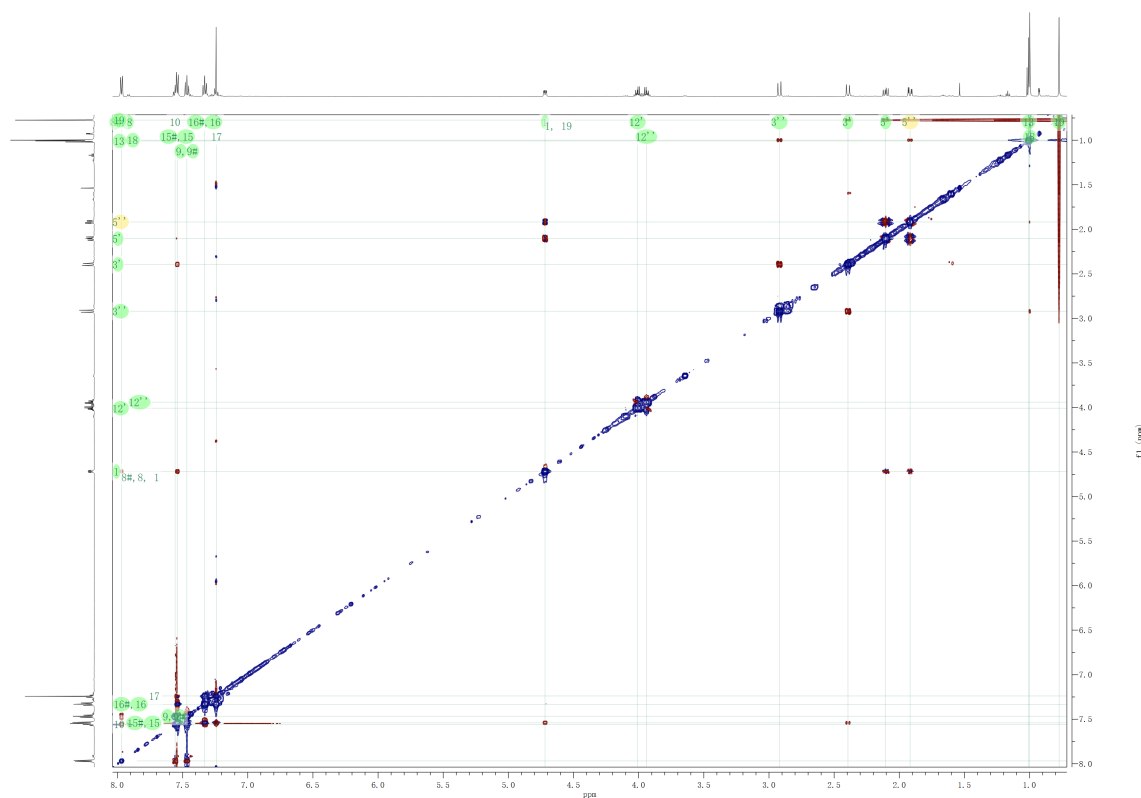

2D COSY spectrum of **21**

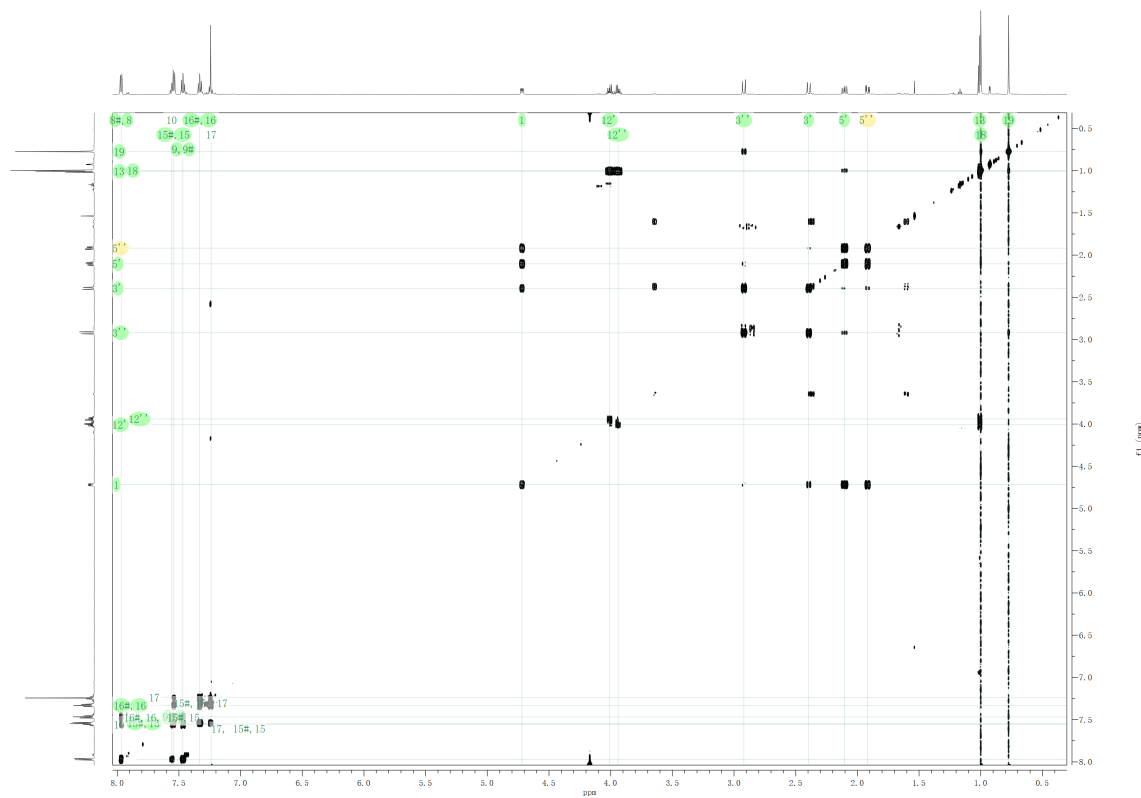

## 2D HSQC spectrum of **21**

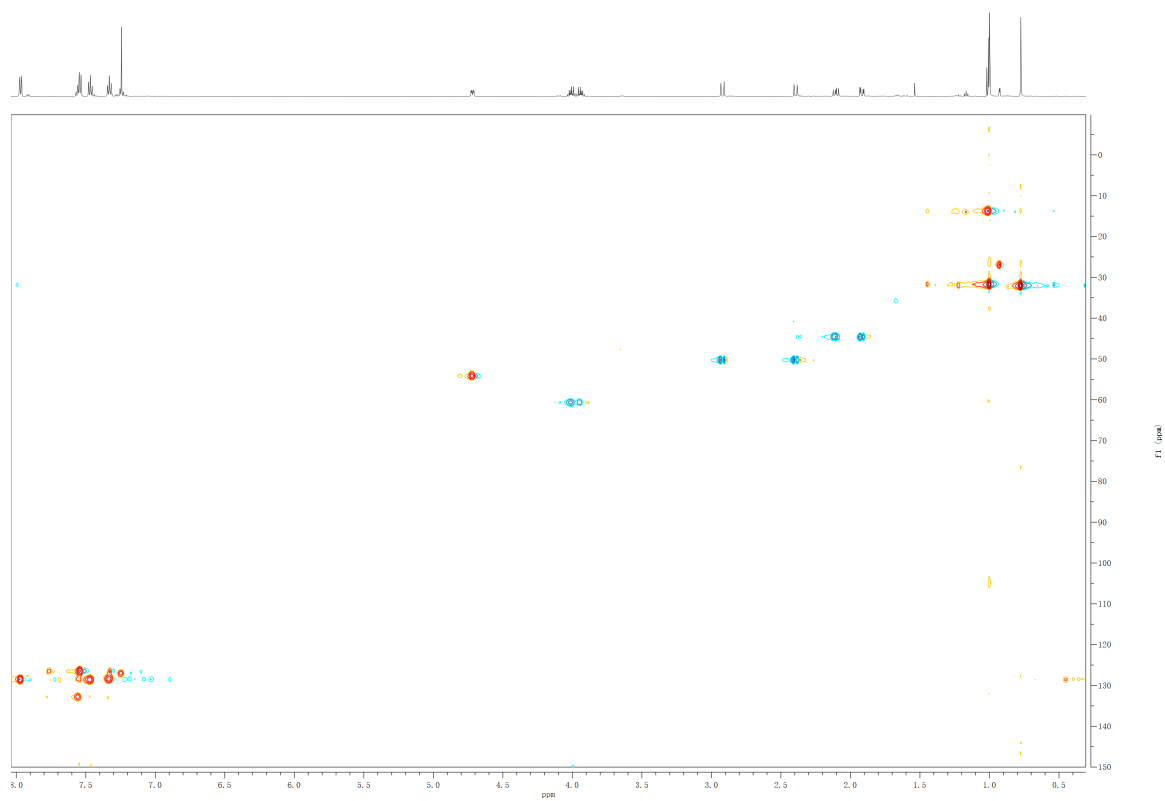

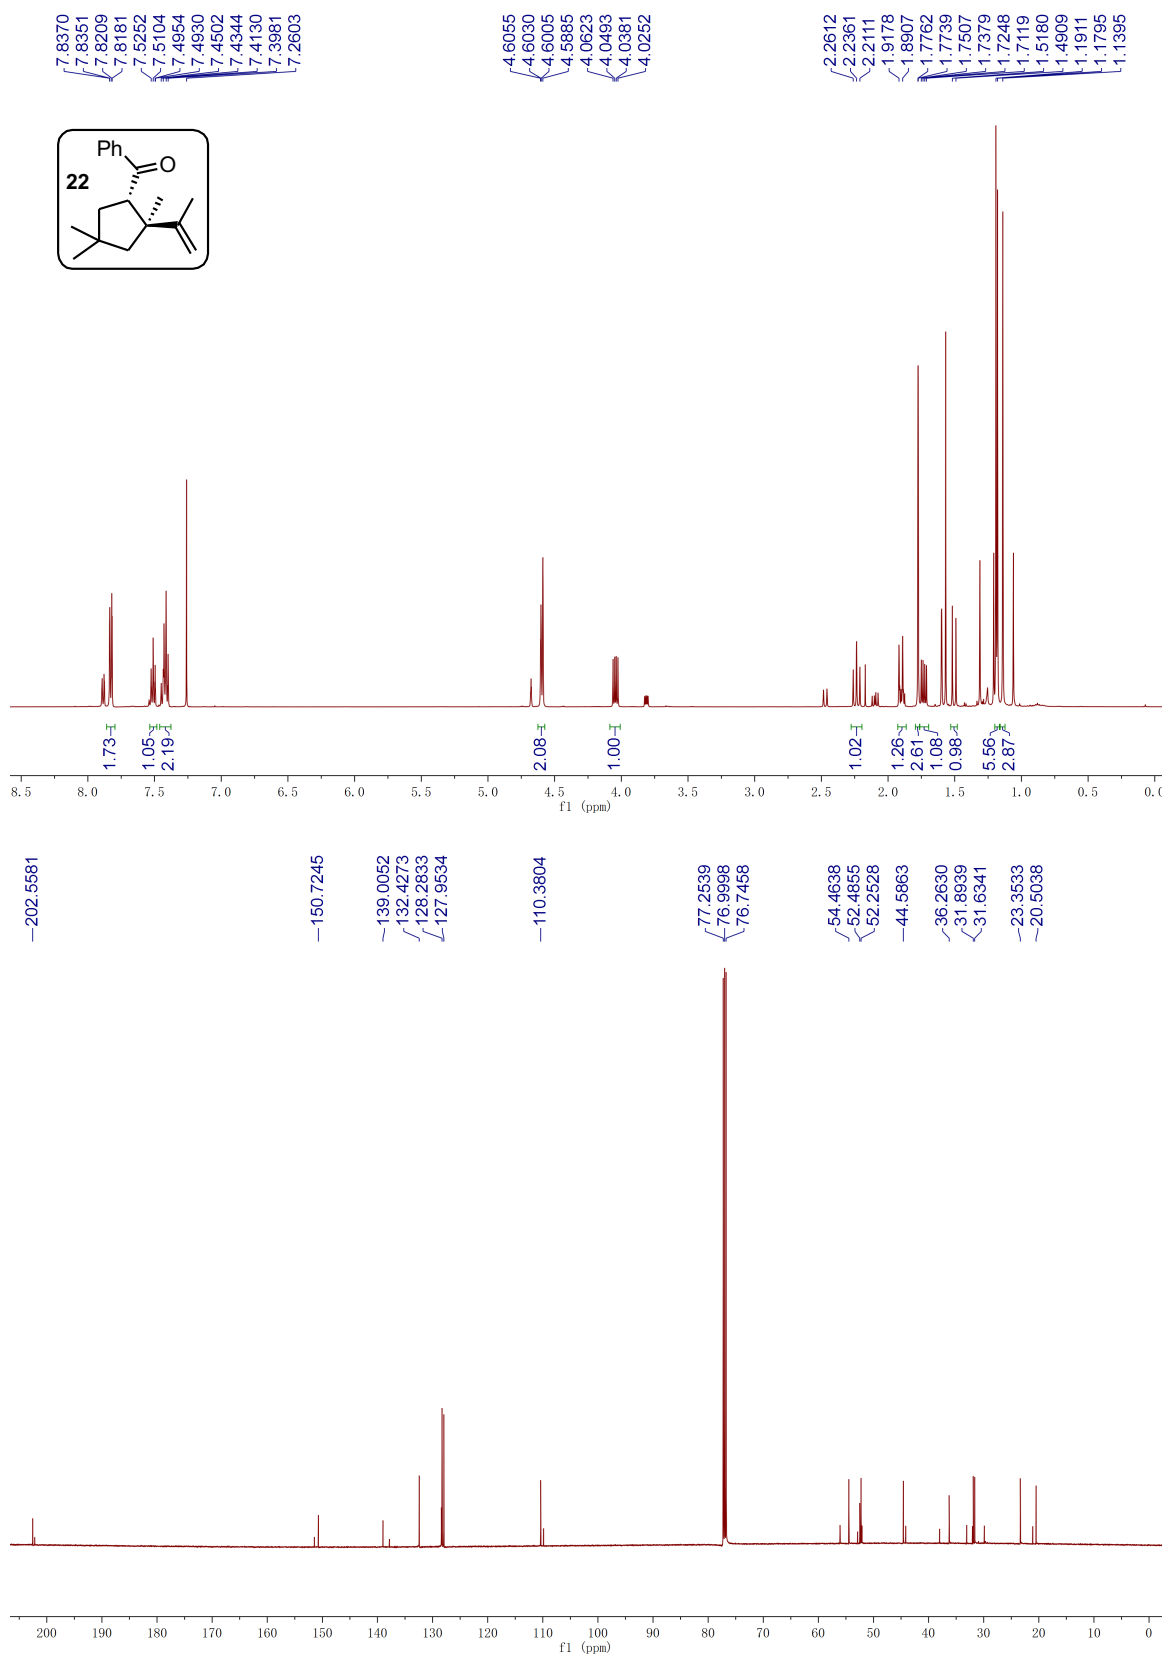



2D ROESY spectrum of **22**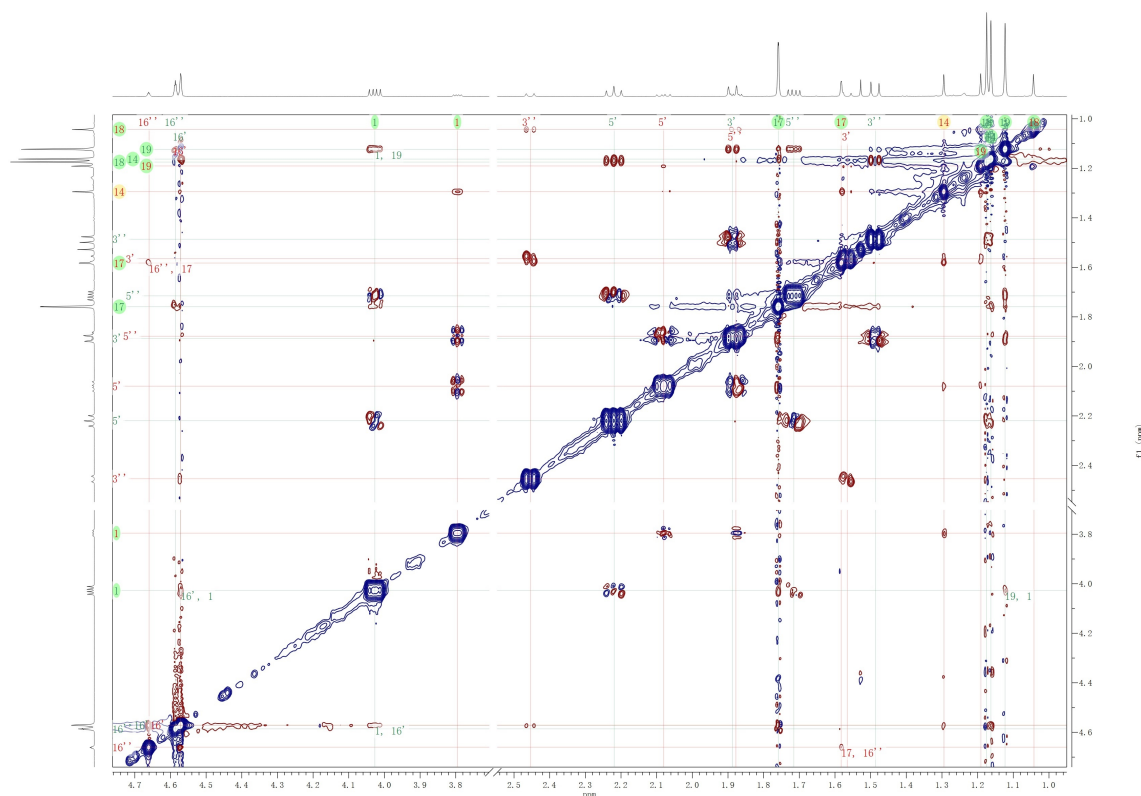2D COSY spectrum of **22**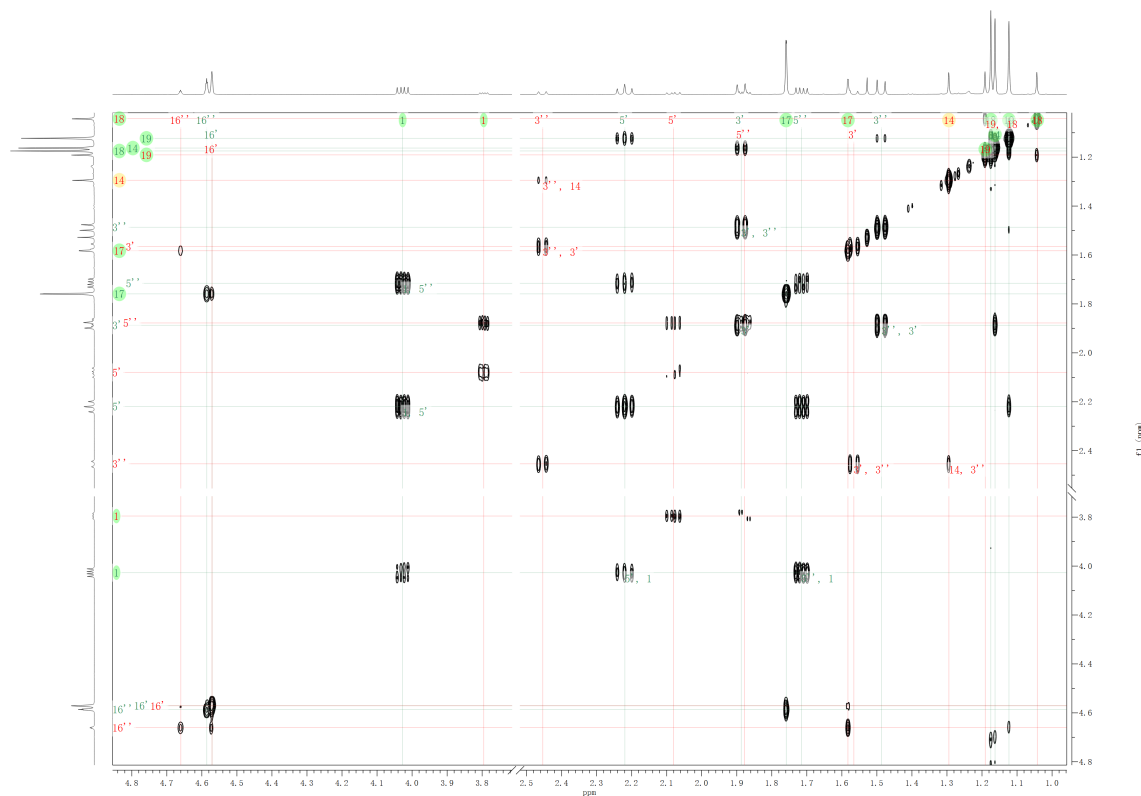

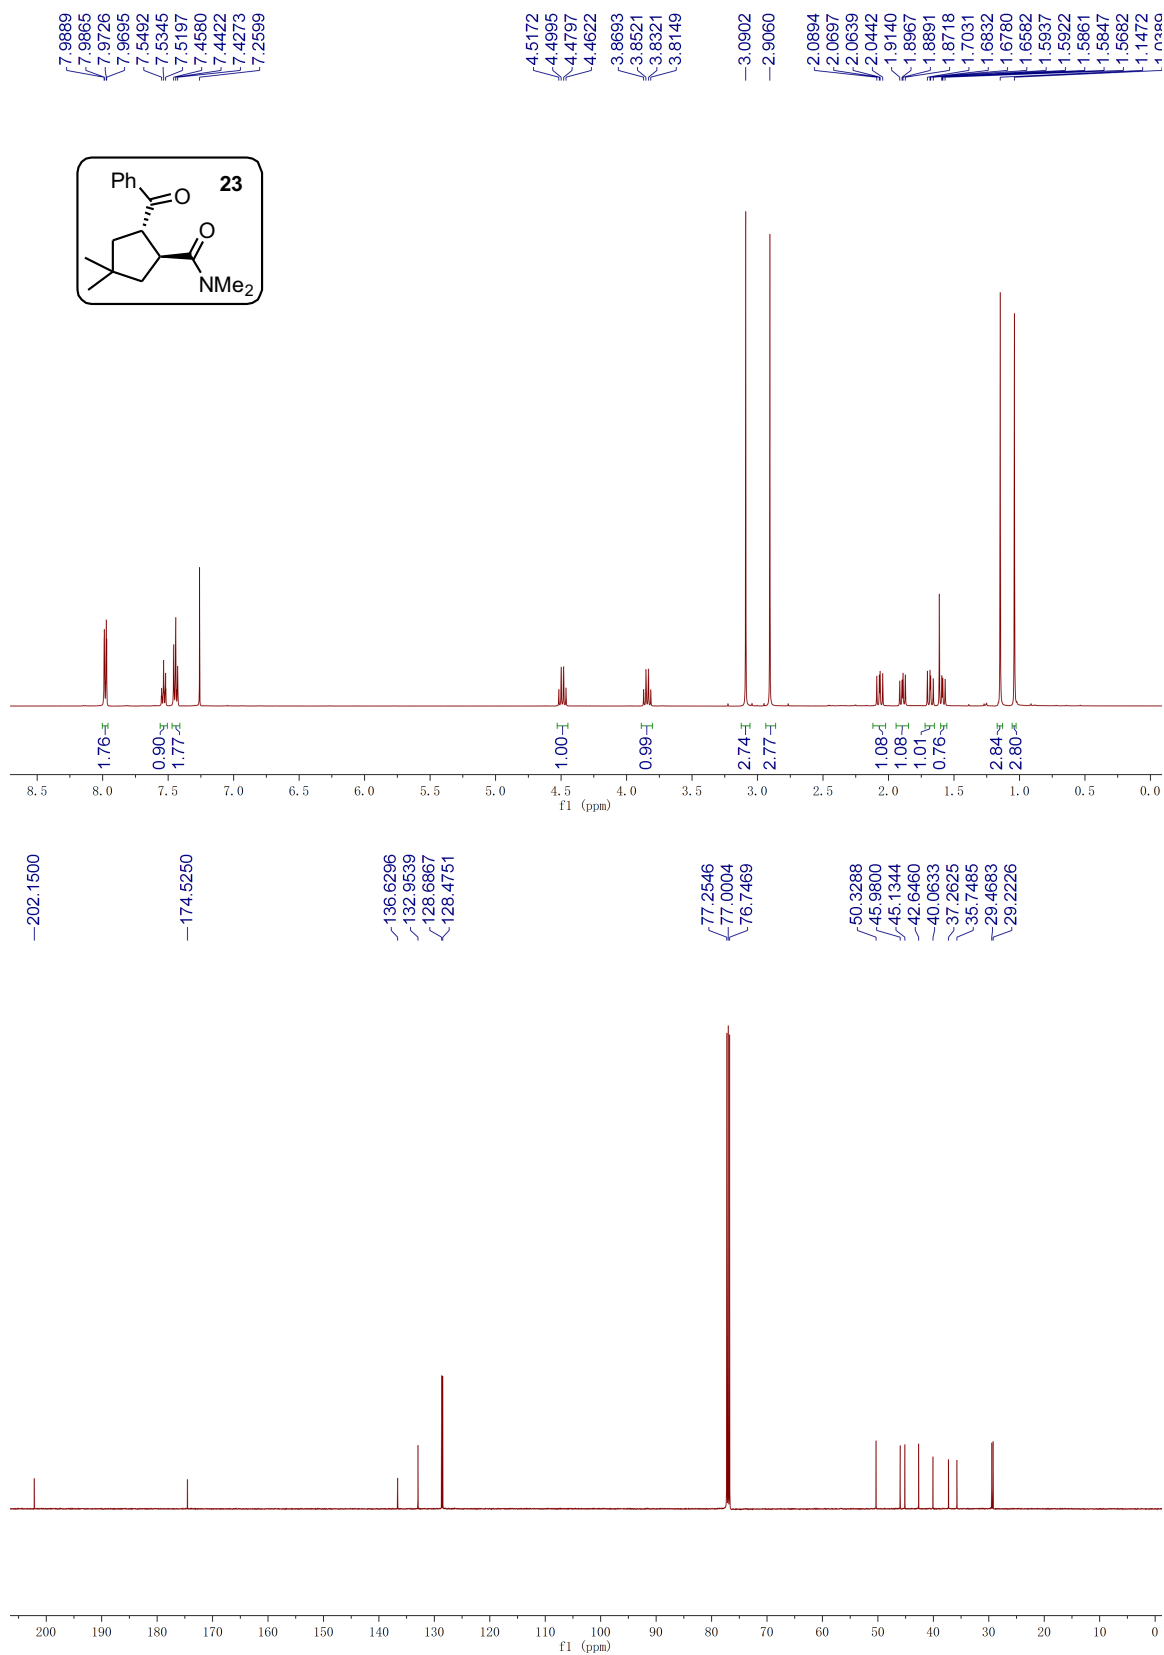

2D ROESY spectrum of **23**

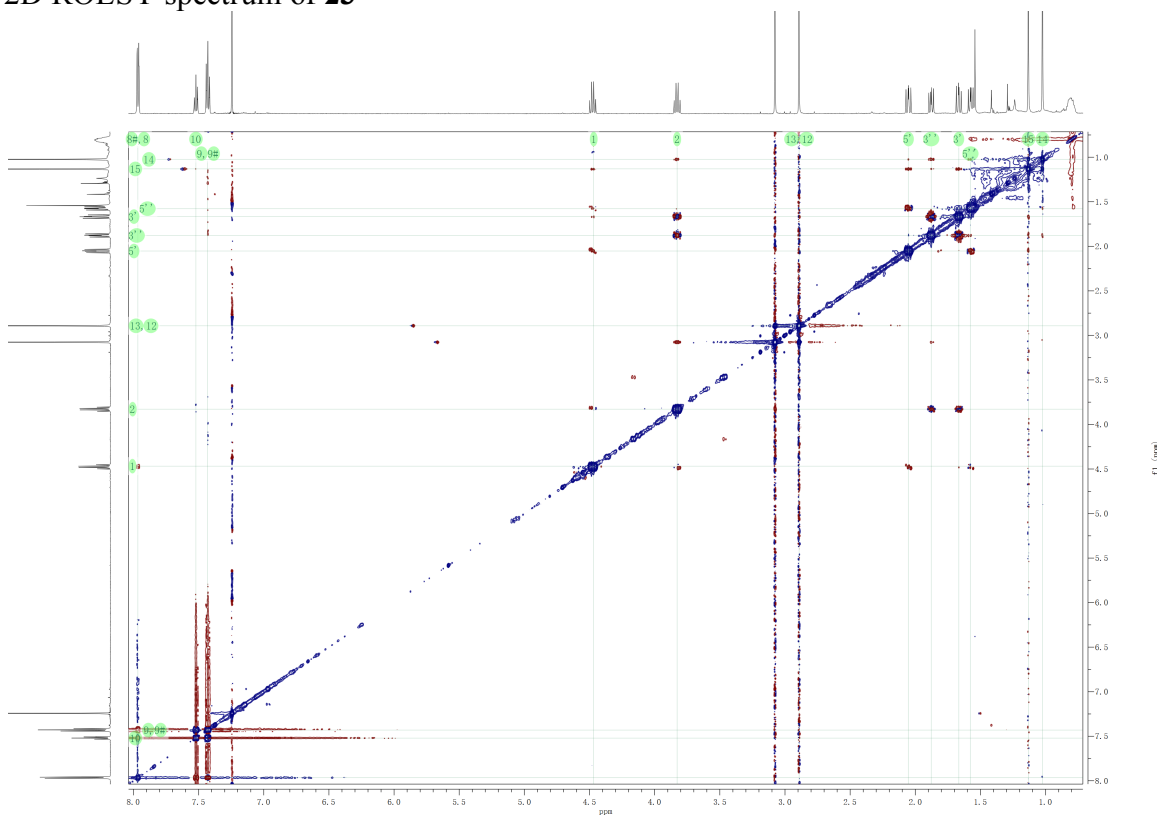

2D COSY spectrum of **23**

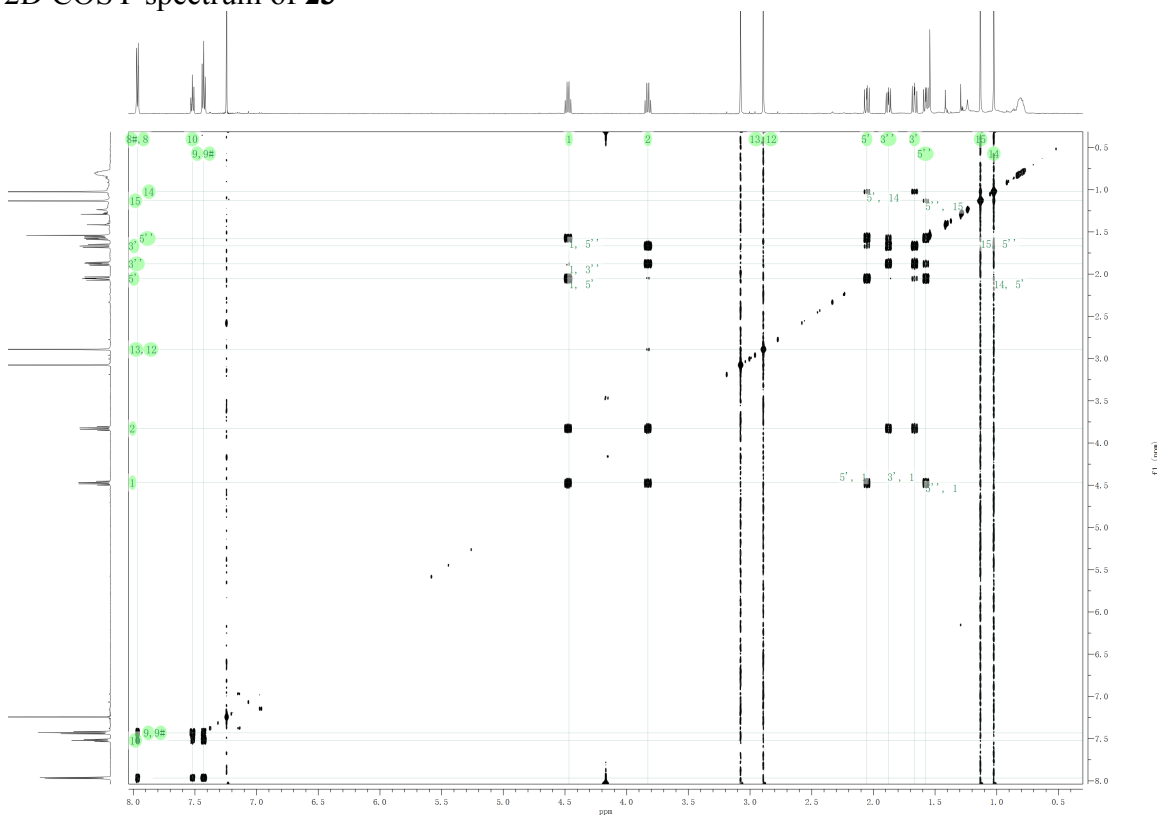

2D HSQC spectrum of **23**

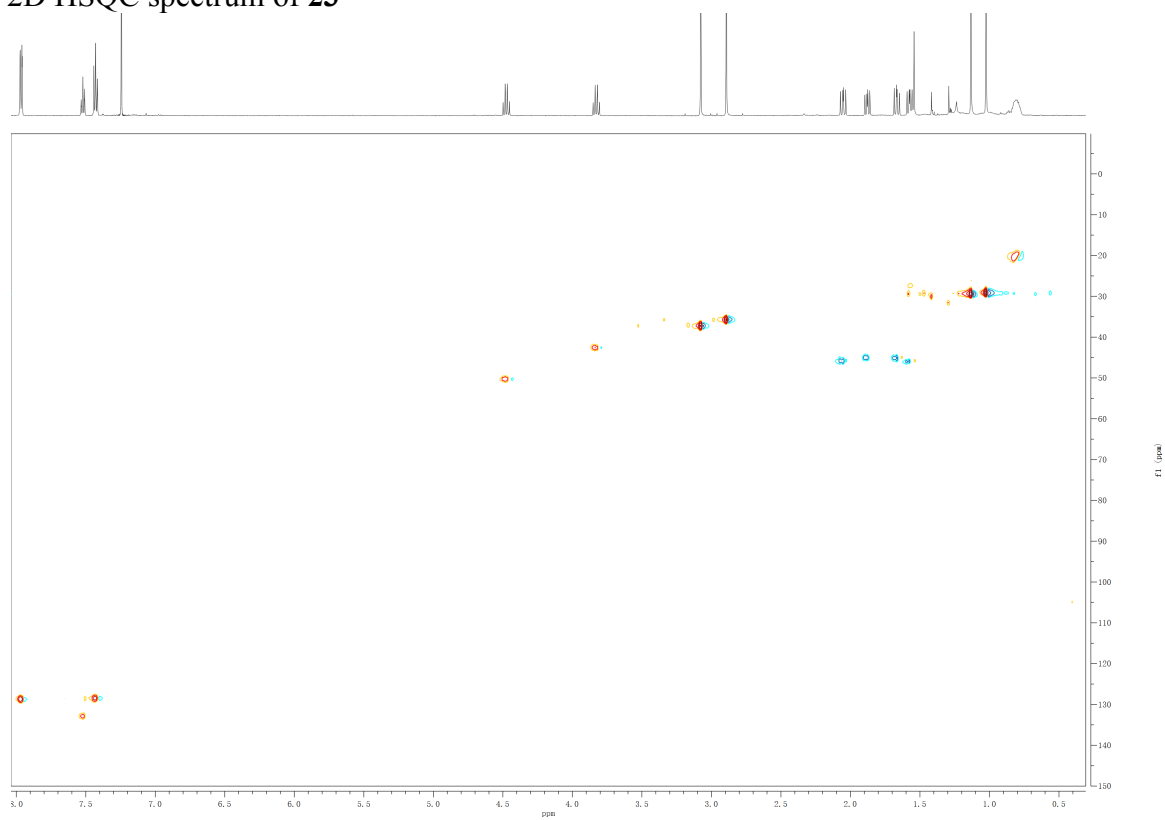

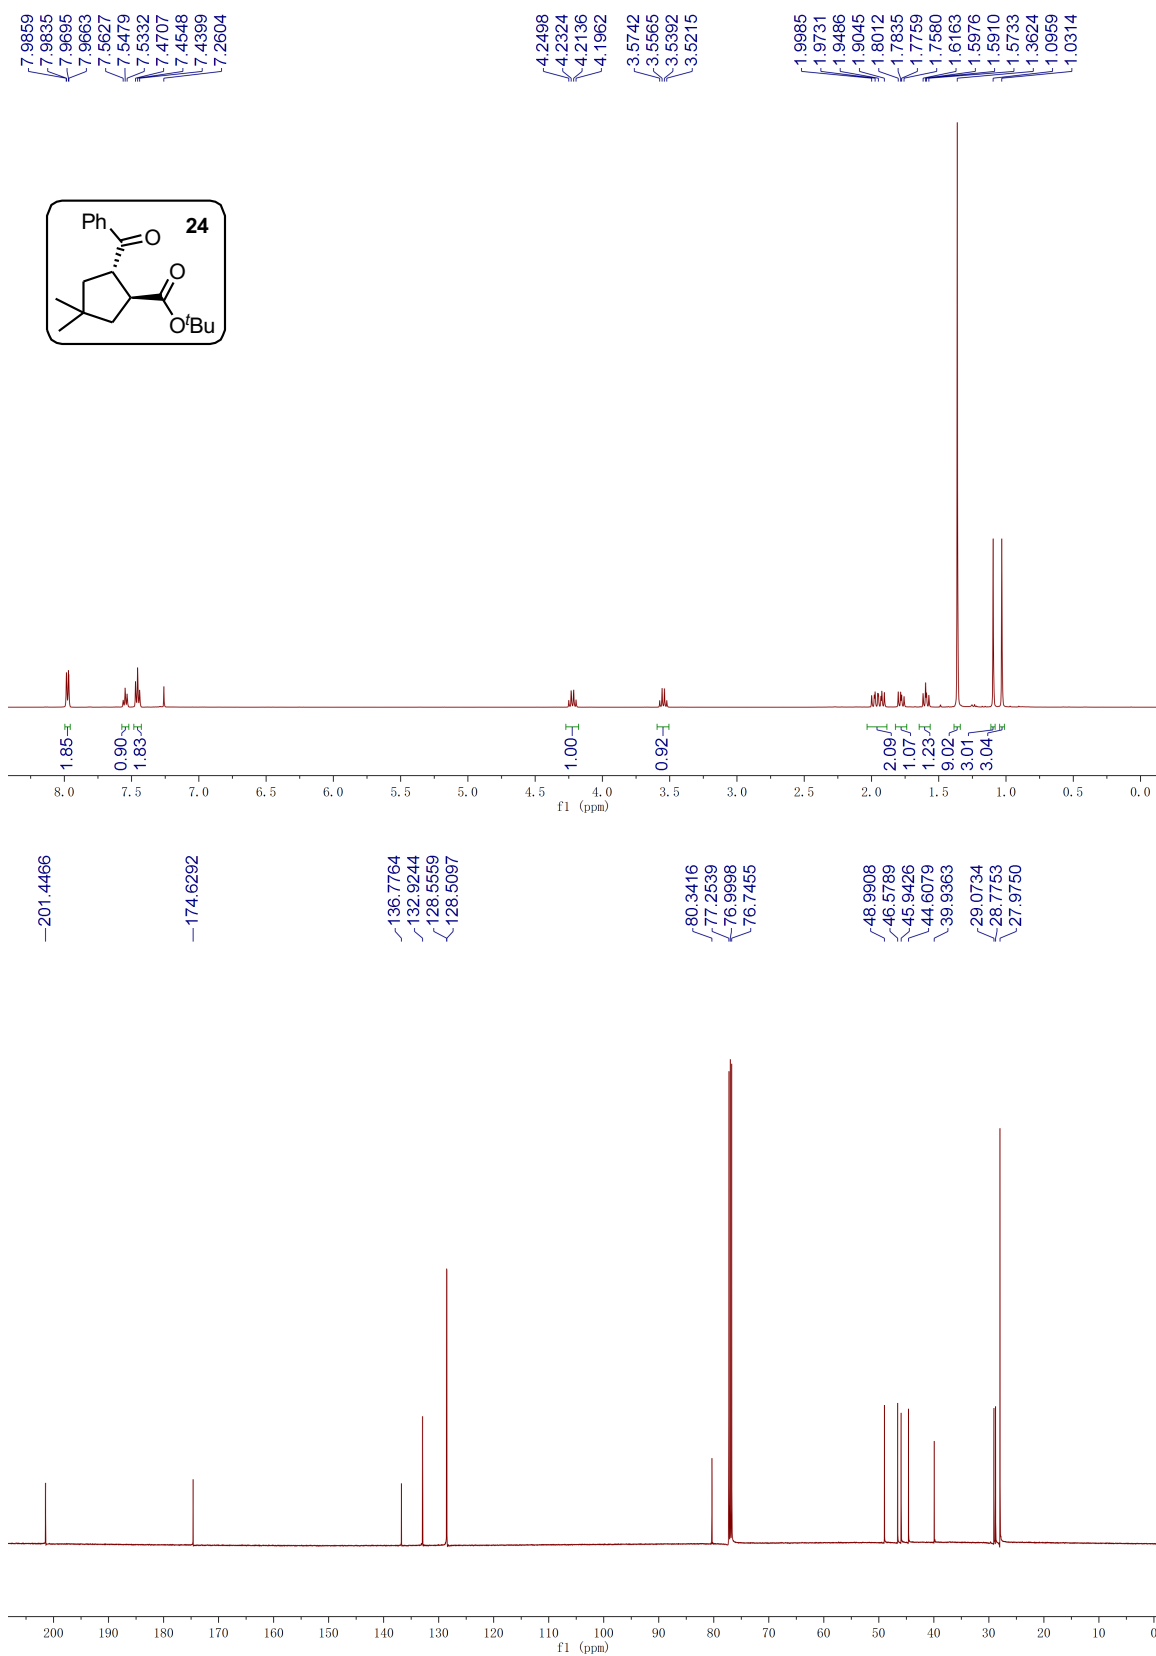

2D ROESY spectrum of **24**

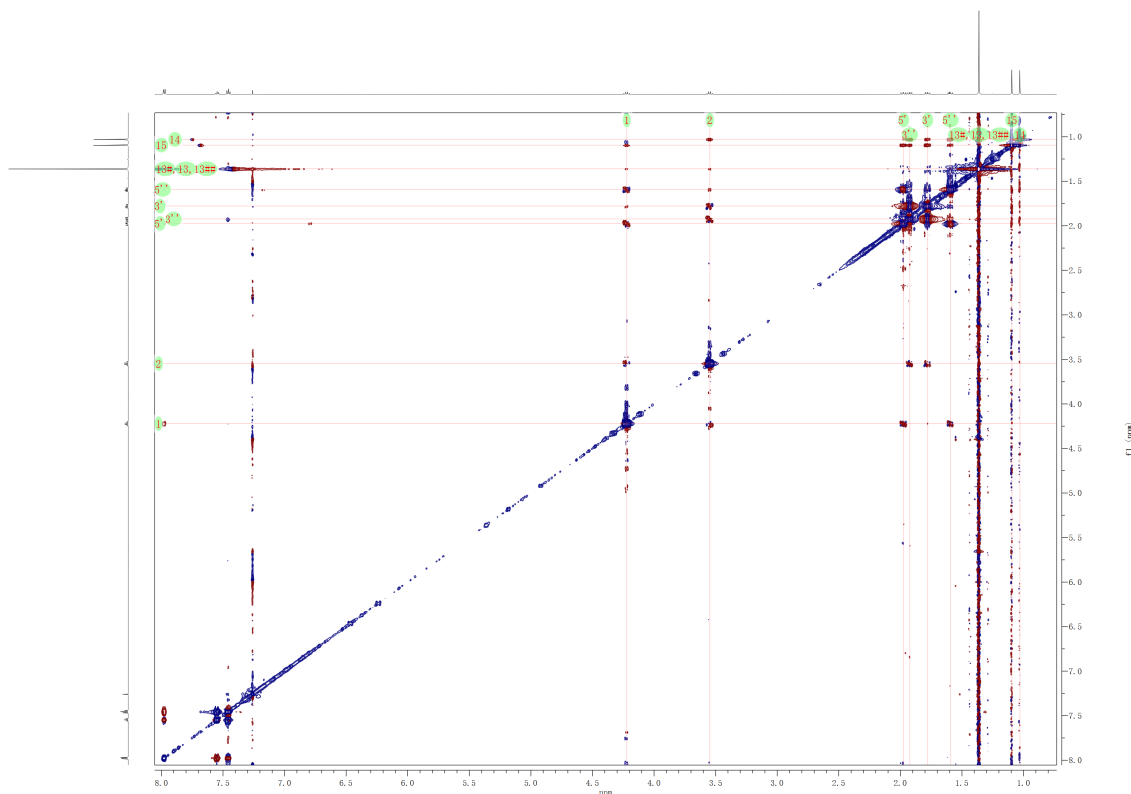

2D COSY spectrum of **24**

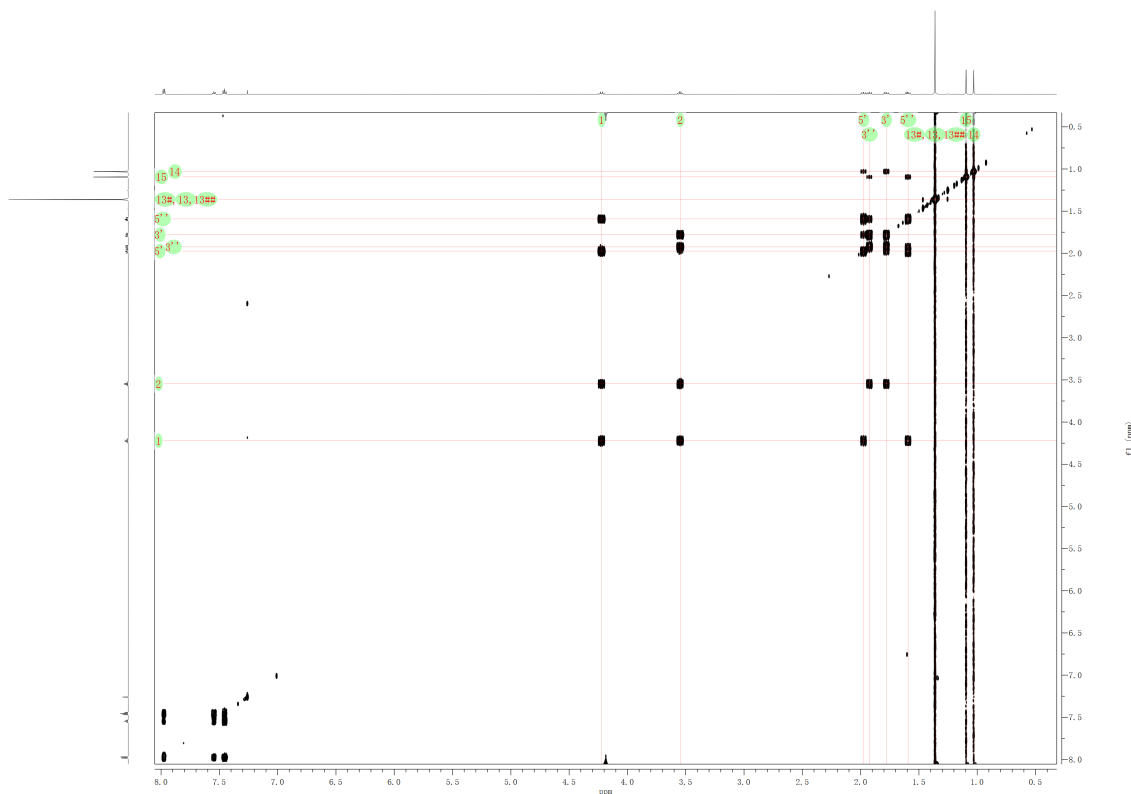

# 2D HSQC spectrum of **24**

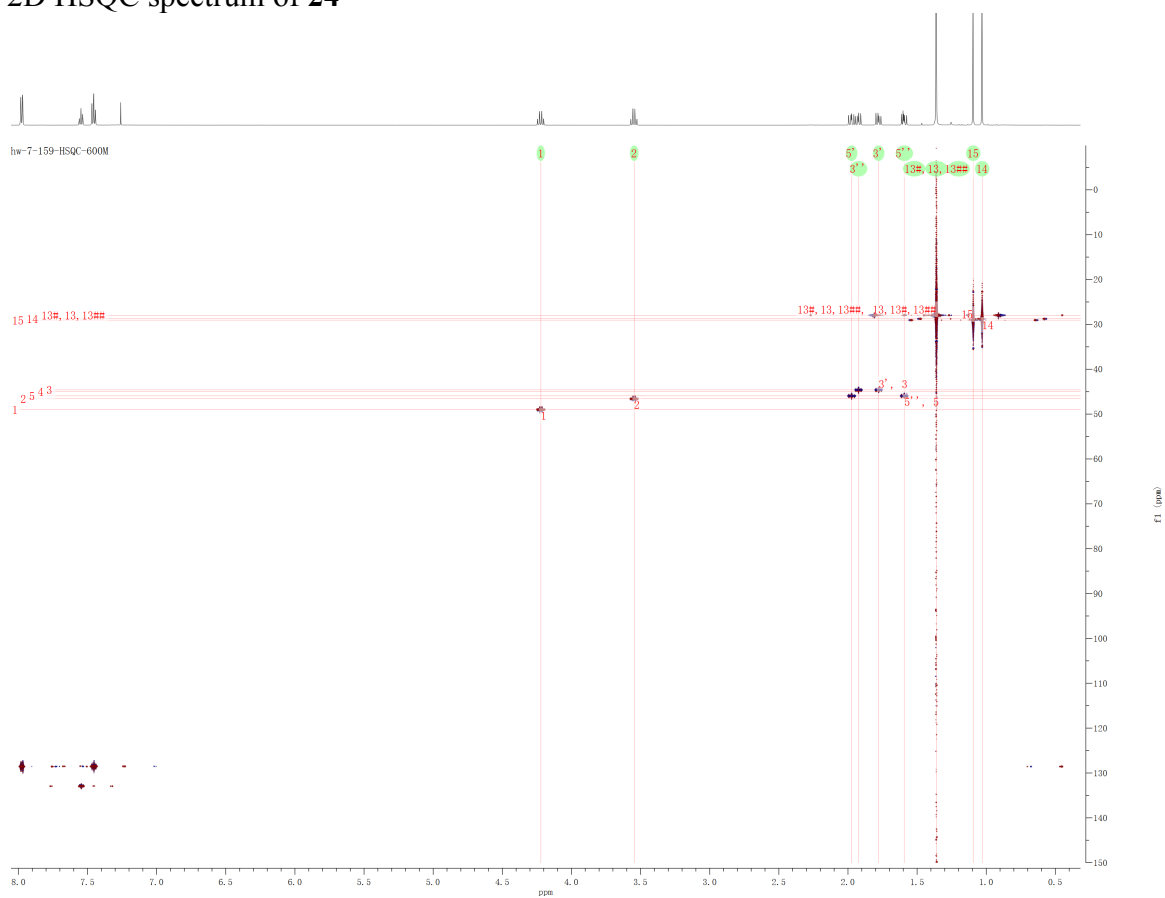

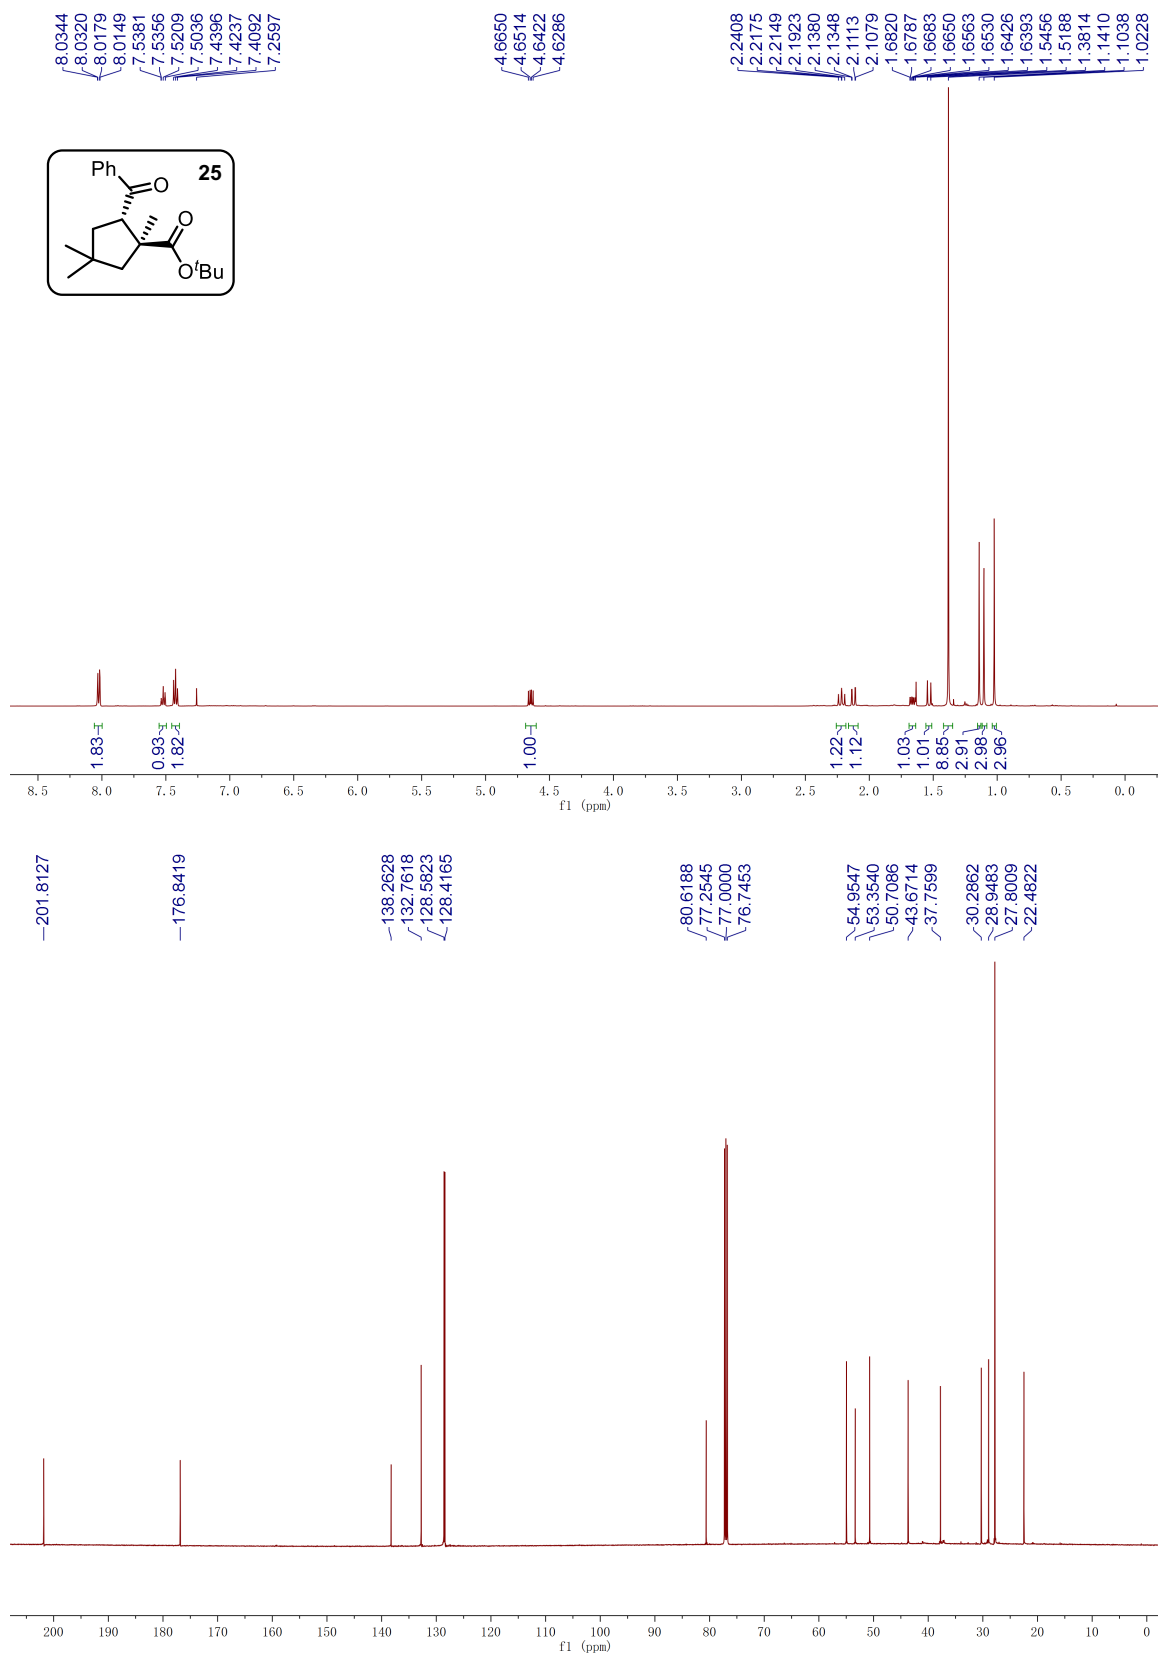



2D ROESY spectrum of **25**

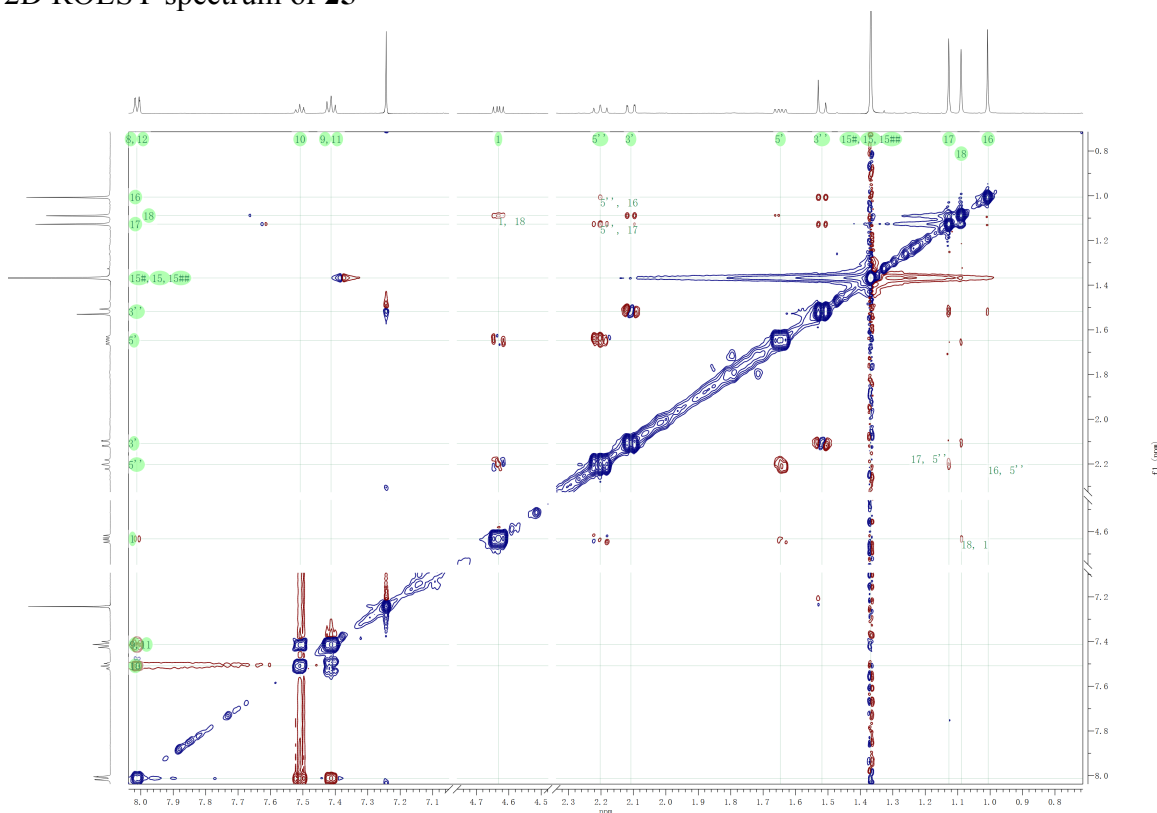

2D COSY spectrum of **25**

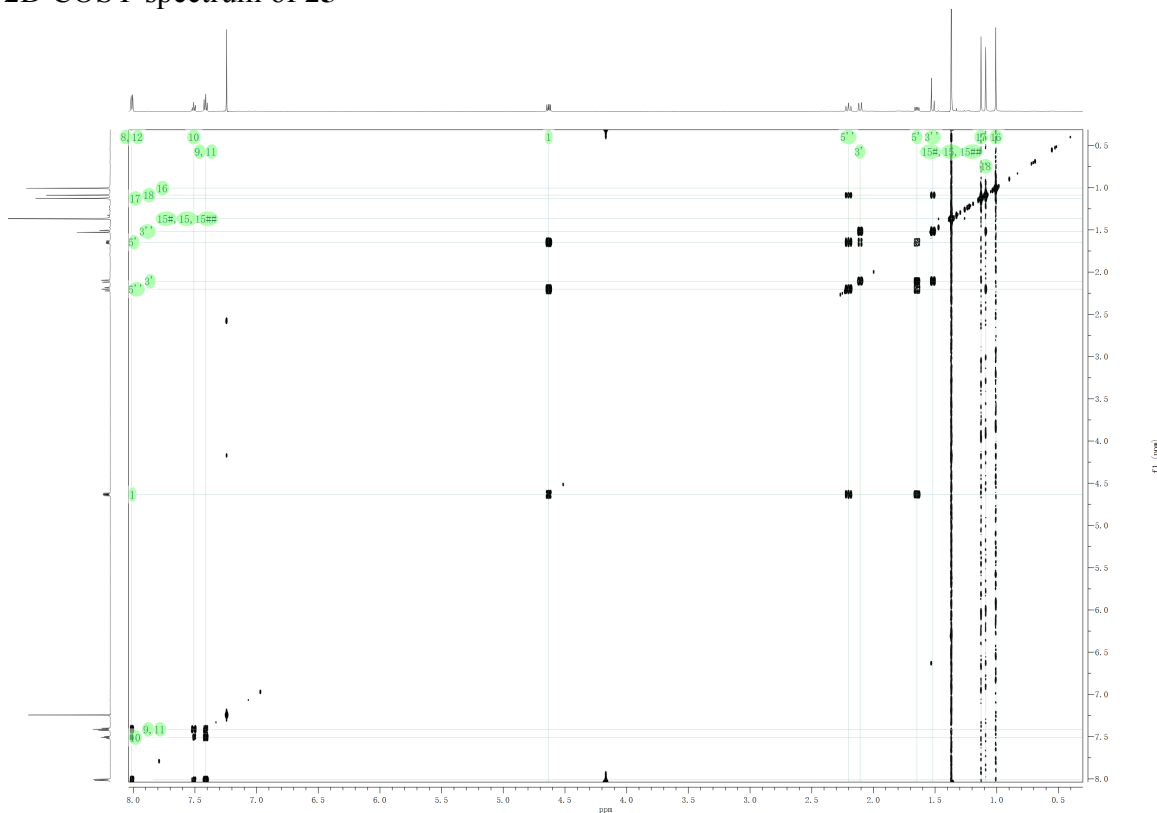

# 2D HSQC spectrum of **25**

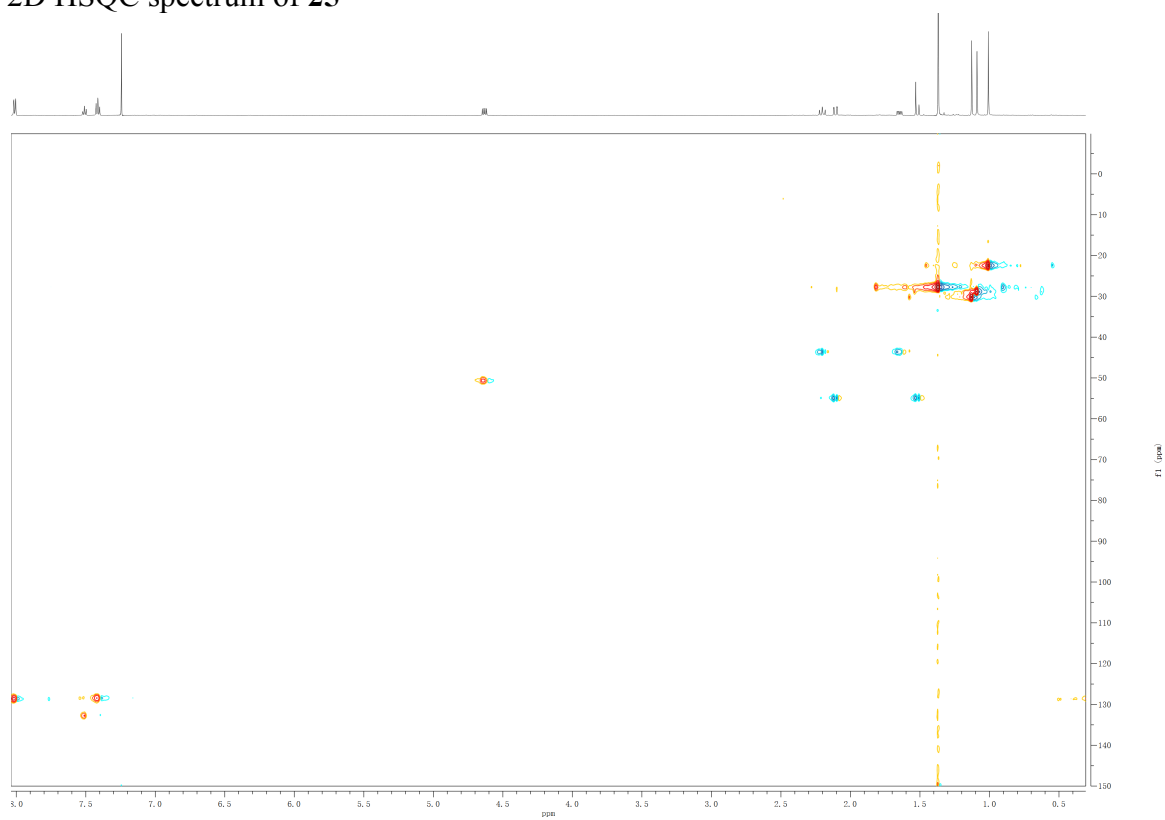

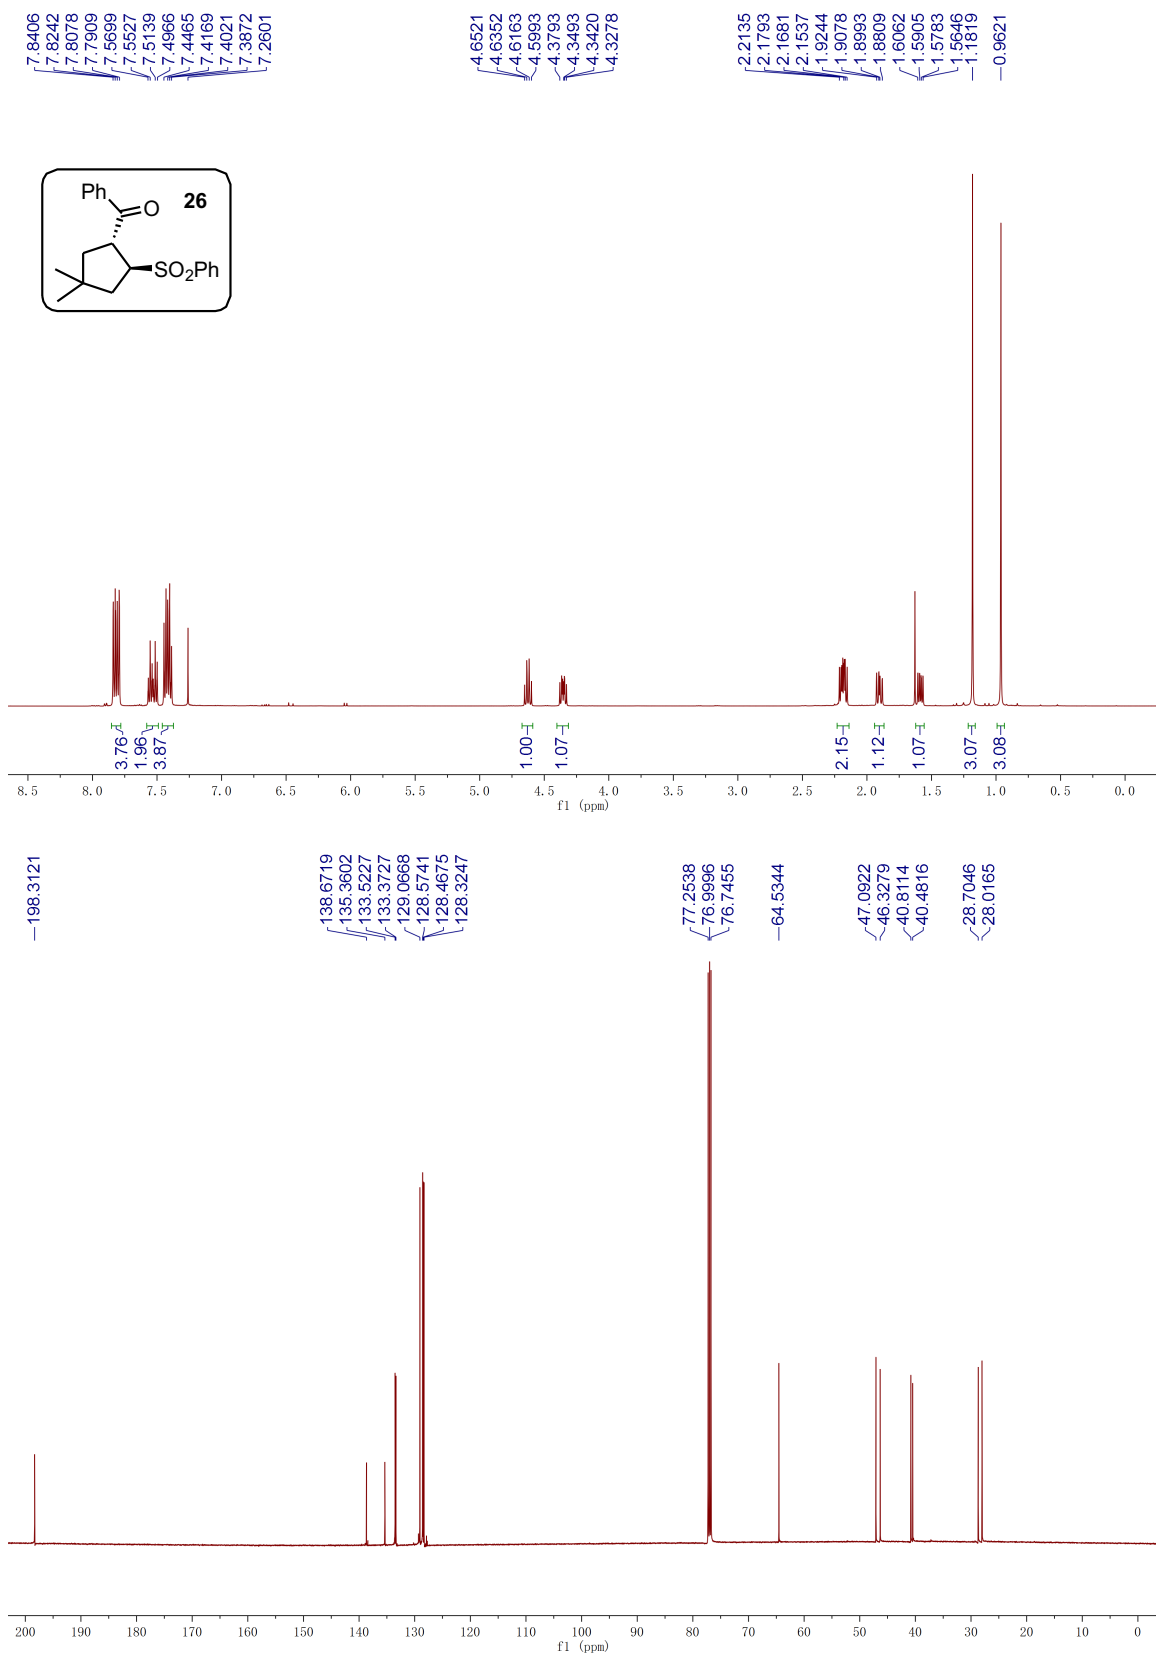

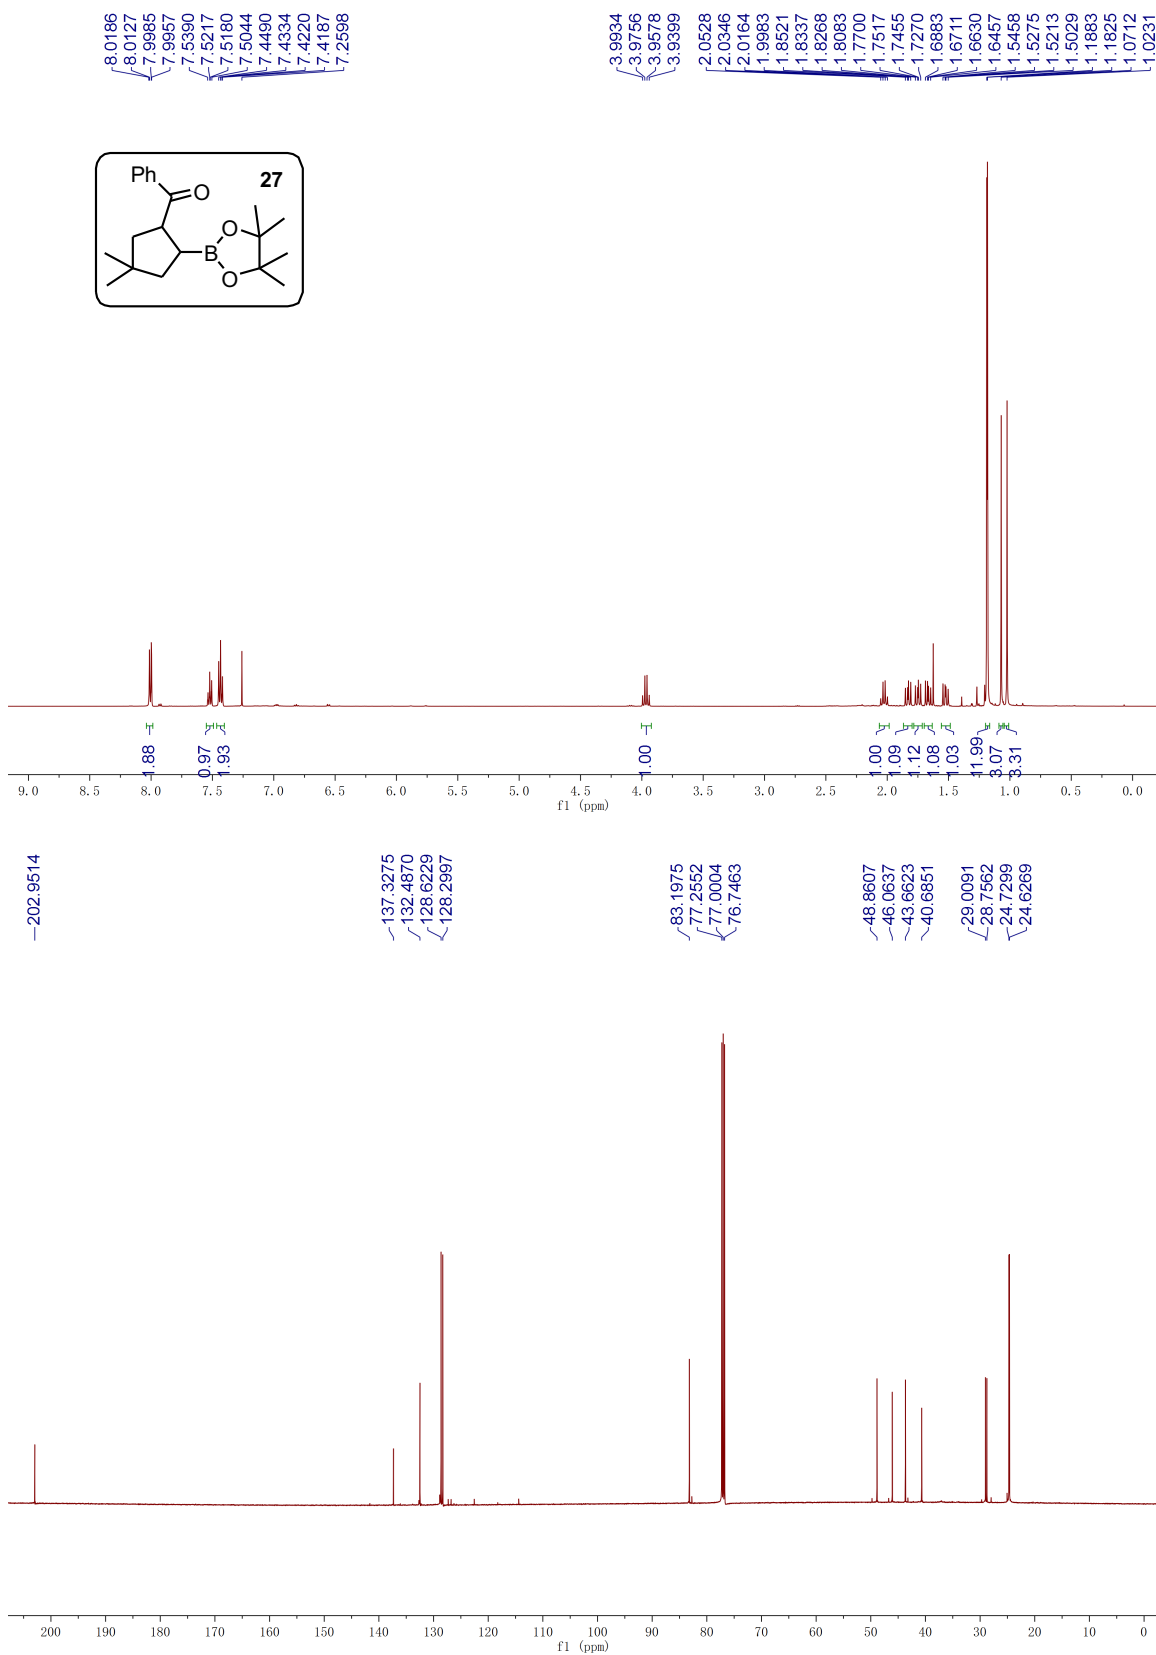

2D ROESY spectrum of **27**

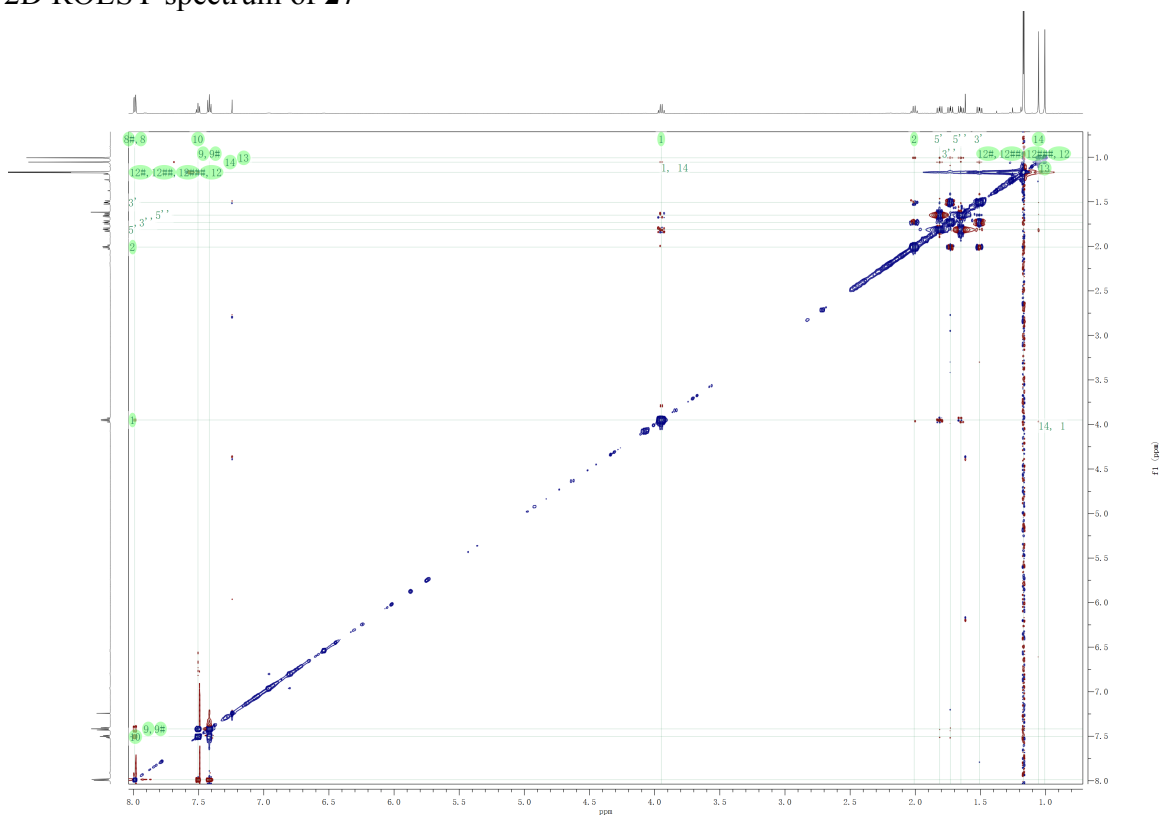

2D COSY spectrum of **27**

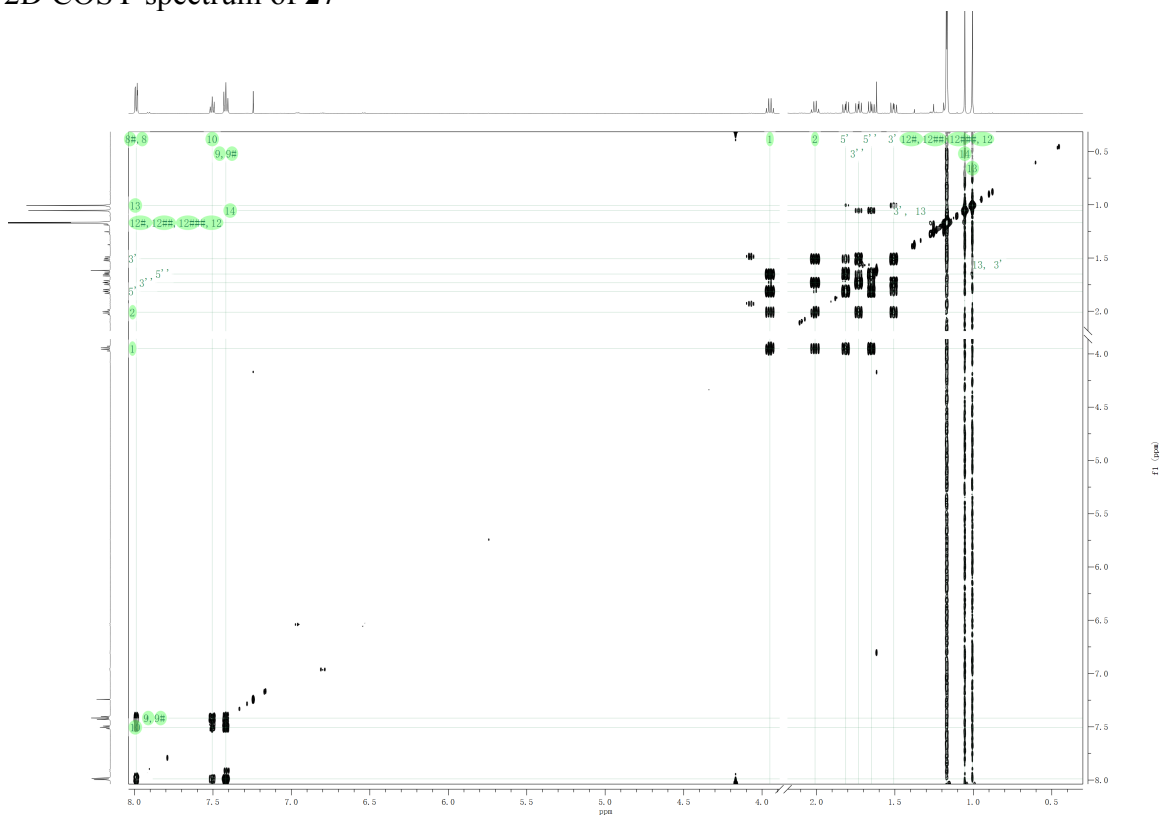

2D HSQC spectrum of **27**

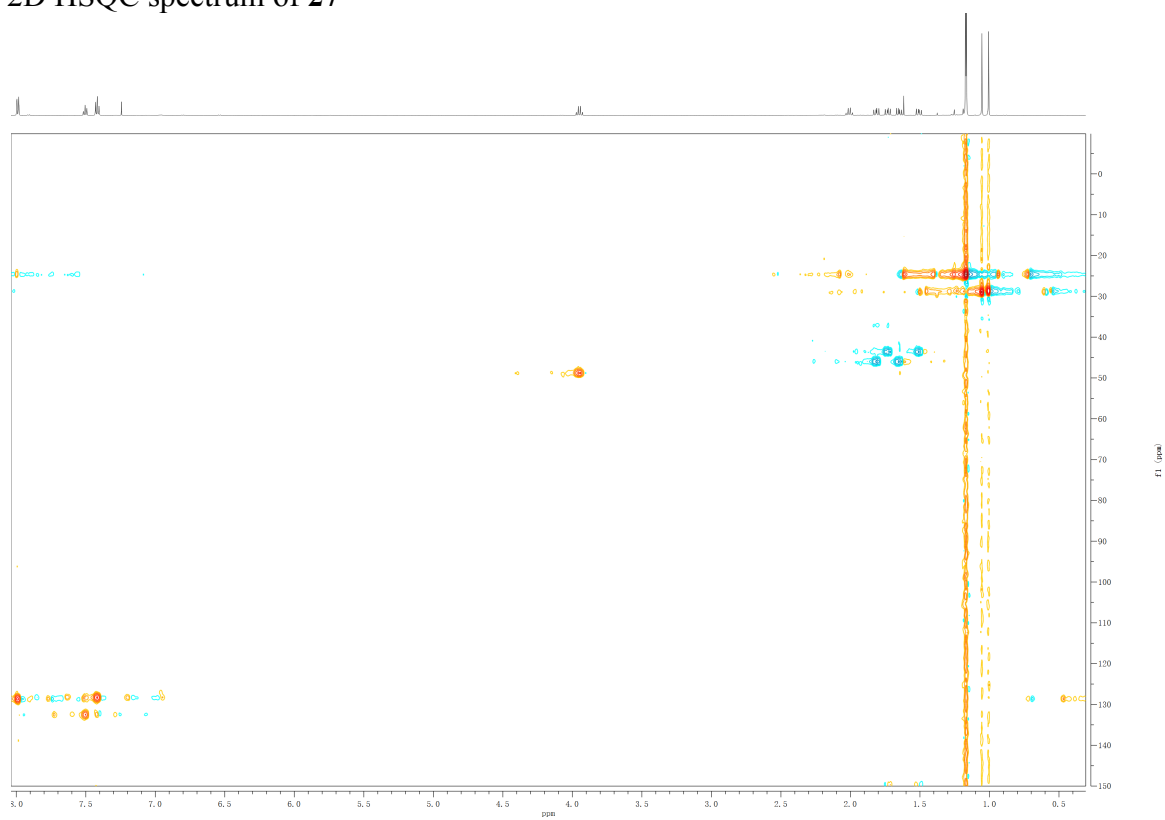

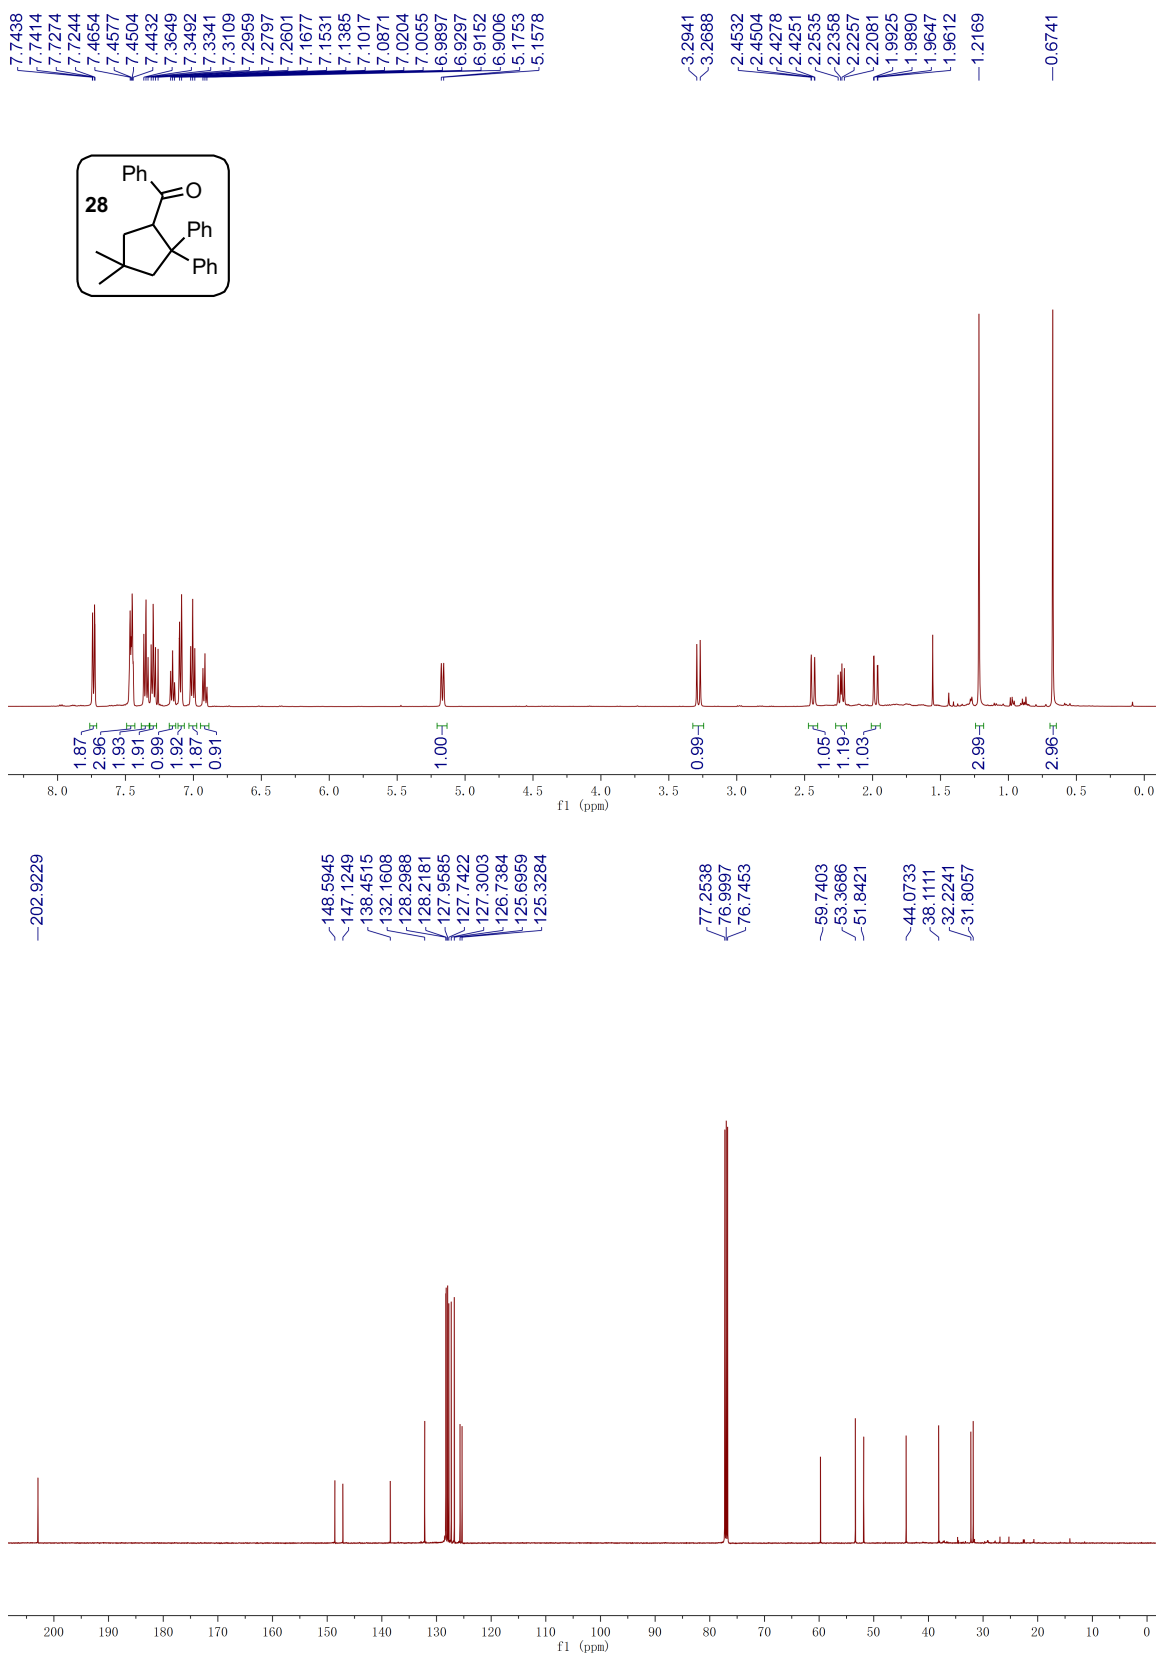

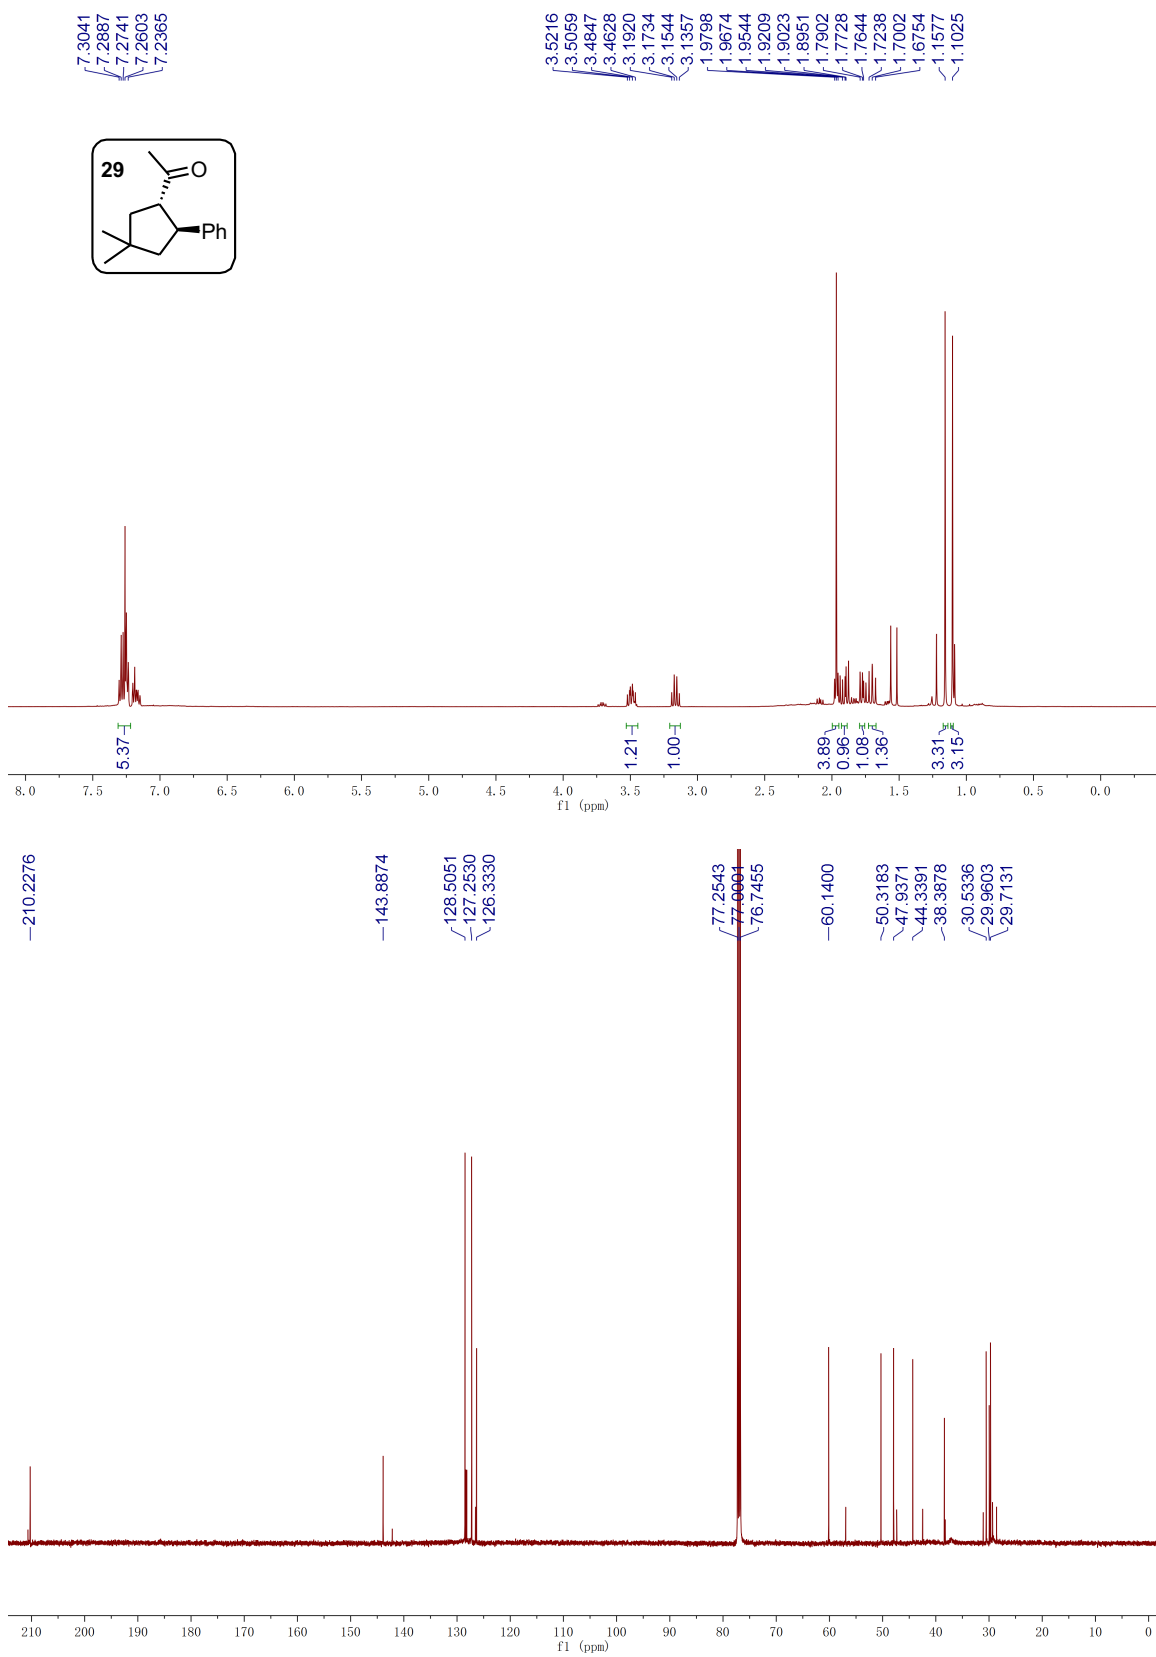



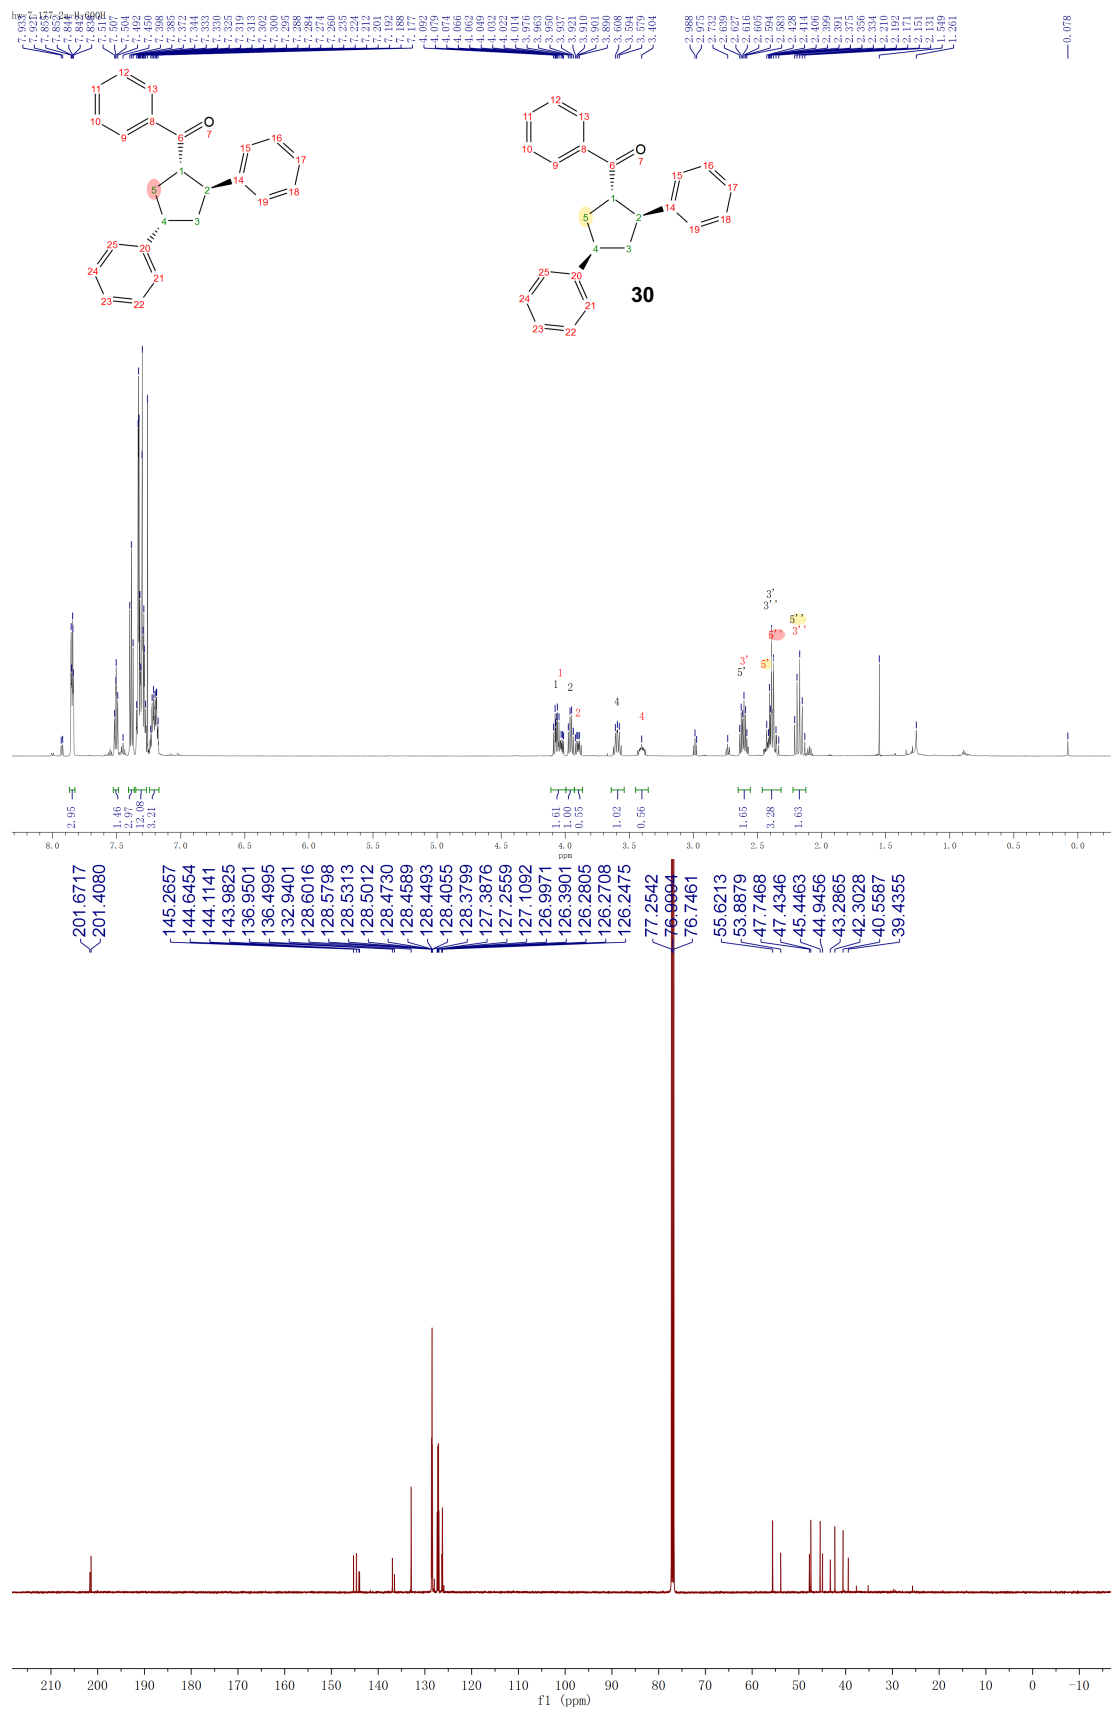

2D ROESY spectrum of **30**

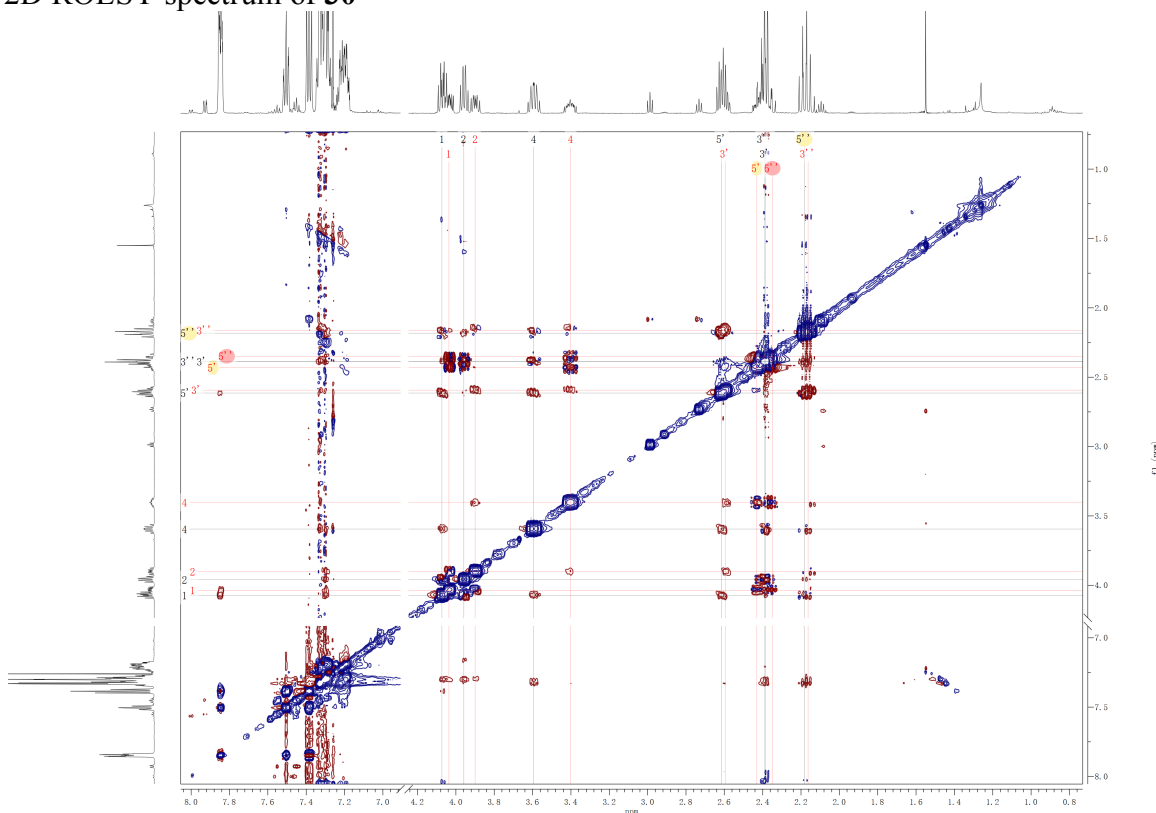

2D COSY spectrum of **30**

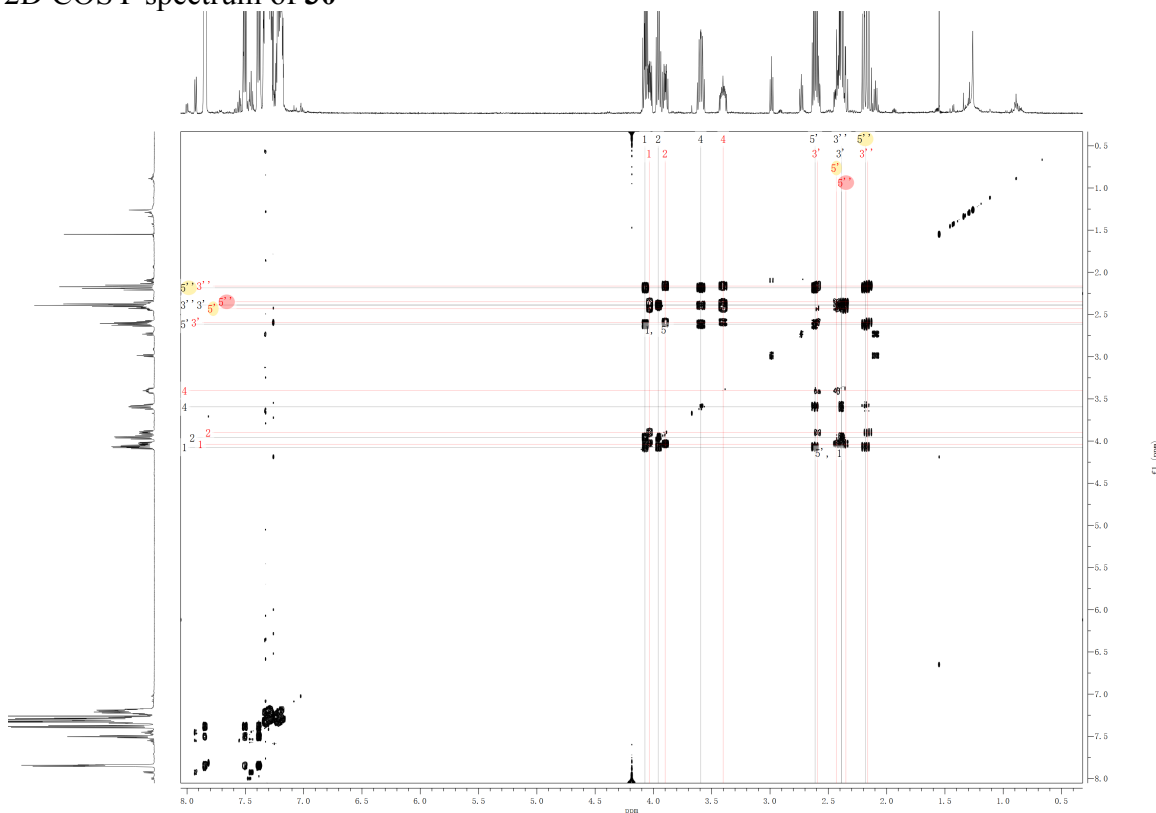

# 2D HSQC spectrum of **30**

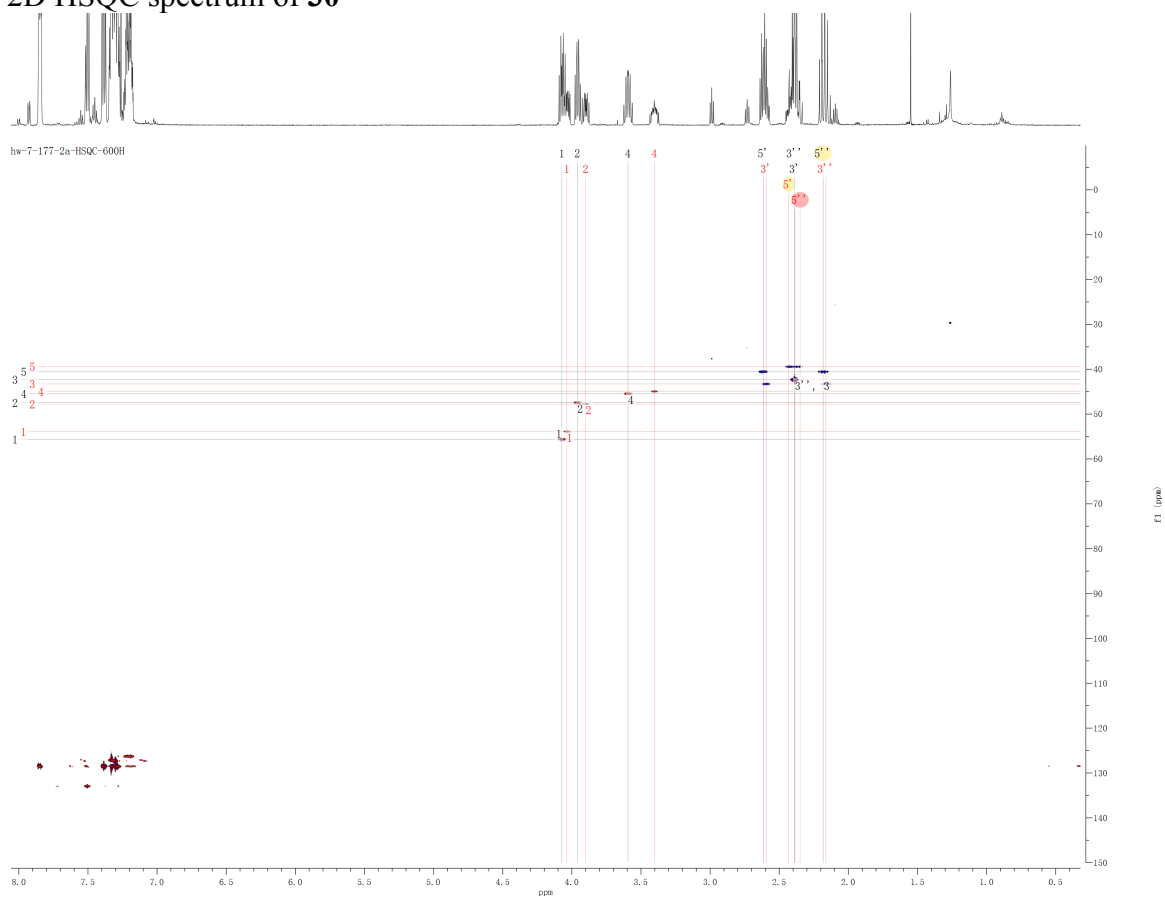

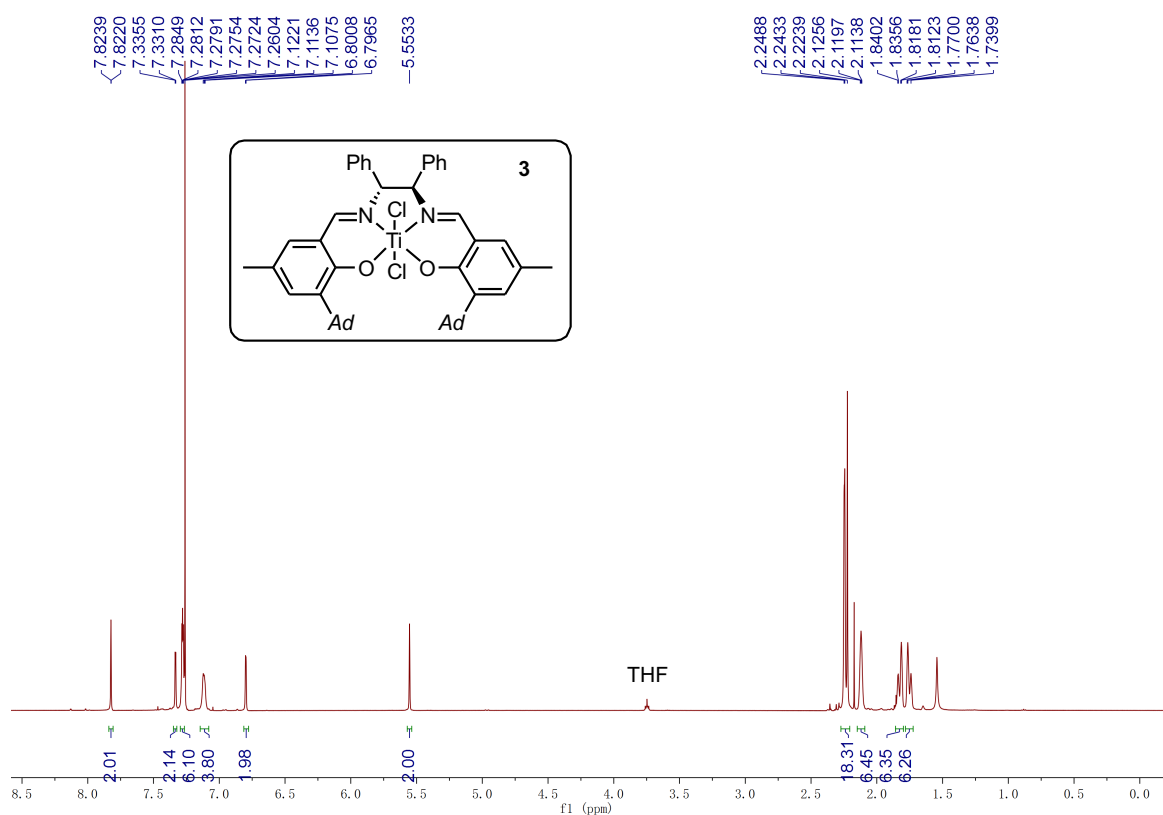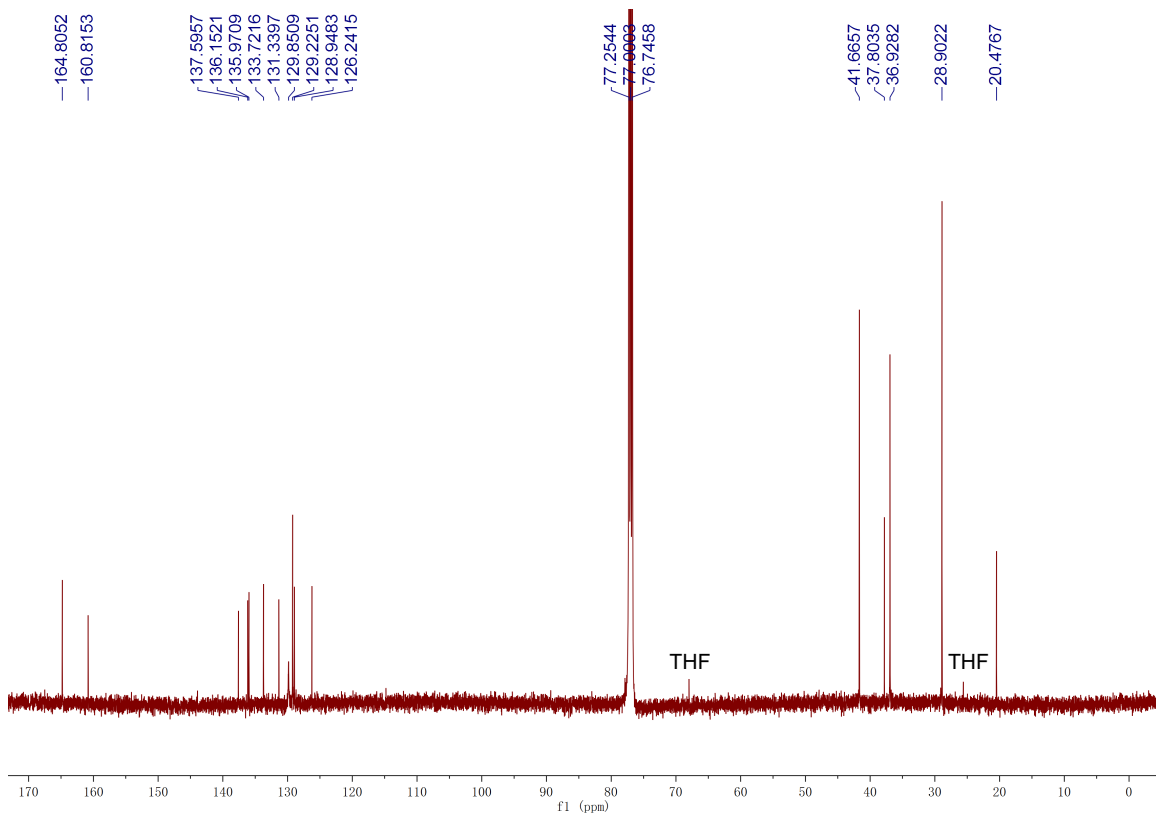

## HPLC traces

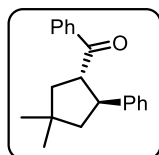

2

Racemic: hw-6-160-trans-AS-0%-0.5

PDA Ch2 223nm

| Peak# | Ret. Time | Area    | Height | Area%   |
|-------|-----------|---------|--------|---------|
| 1     | 14.579    | 2600733 | 89457  | 50.095  |
| 2     | 15.880    | 2590915 | 78619  | 49.905  |
| Total |           | 5191649 | 168076 | 100.000 |

mAU

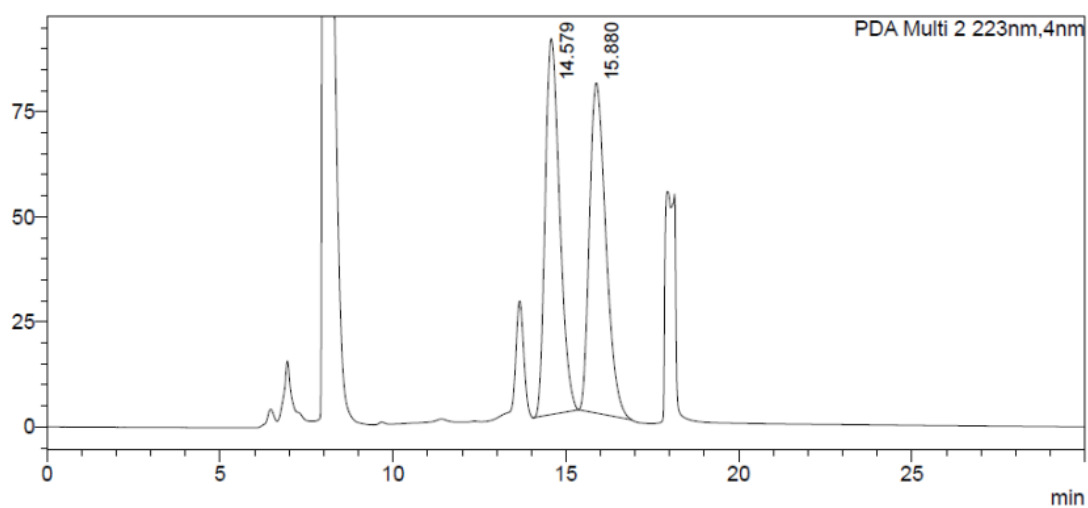

Scalemic: hw-6-148-2-AS-0%-0.5

PDA Ch2 223nm

| Peak# | Ret. Time | Area    | Height | Area%   |
|-------|-----------|---------|--------|---------|
| 1     | 13.951    | 4830518 | 174363 | 98.502  |
| 2     | 15.239    | 73443   | 3289   | 1.498   |
| Total |           | 4903961 | 177652 | 100.000 |

mAU

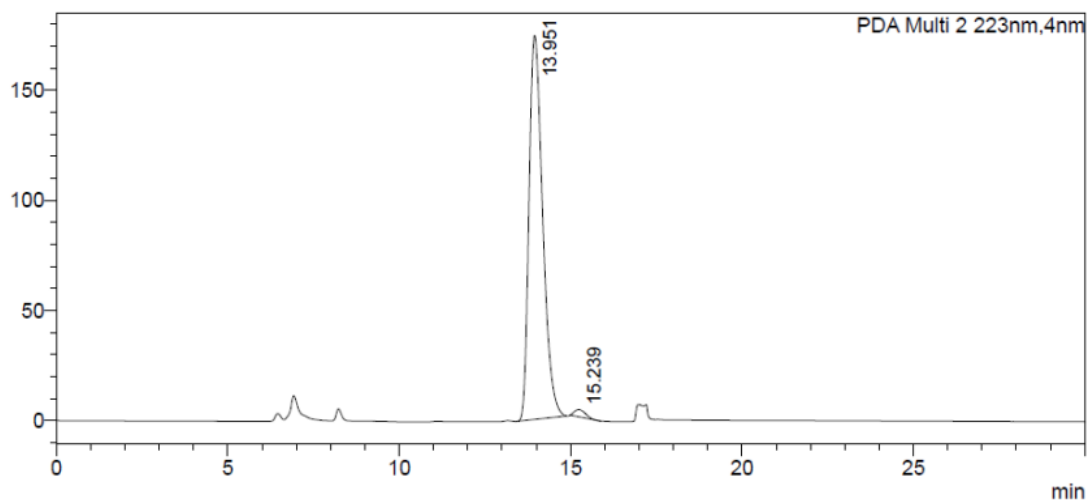

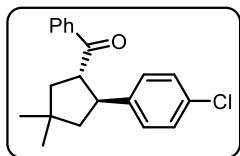

**8**

Racemic: hw-6-192a-AD-0.5%-1.0

PDA Ch2 223nm

| Peak# | Ret. Time | Area    | Height | Area%   |
|-------|-----------|---------|--------|---------|
| 1     | 7.584     | 2062884 | 76680  | 50.094  |
| 2     | 12.381    | 2055129 | 63516  | 49.906  |
| Total |           | 4118013 | 140196 | 100.000 |

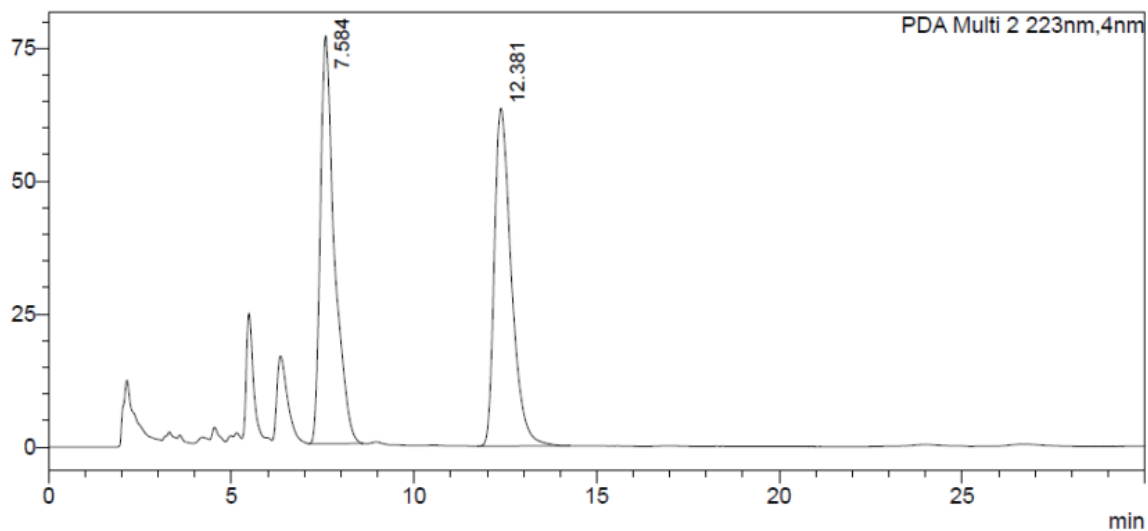

Scalemic: hw-6-172a-AD-0.5%-1.0

PDA Ch2 223nm

| Peak# | Ret. Time | Area    | Height | Area%   |
|-------|-----------|---------|--------|---------|
| 1     | 7.527     | 2434731 | 100165 | 97.891  |
| 2     | 12.713    | 52455   | 1662   | 2.109   |
| Total |           | 2487185 | 101828 | 100.000 |

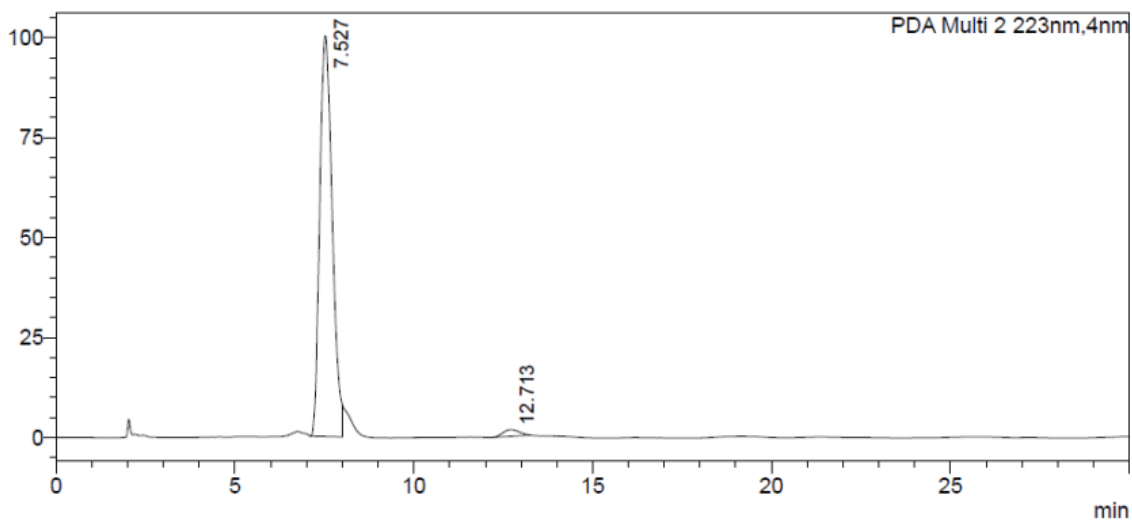

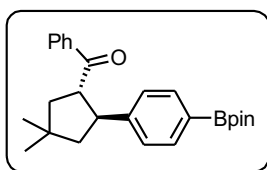

**9**

Racemic: hw-7-12a-OD-0.5%-1.0

PDA Ch2 223nm

| Peak# | Ret. Time | Area    | Height | Area%   |
|-------|-----------|---------|--------|---------|
| 1     | 8.459     | 1267238 | 76697  | 49.901  |
| 2     | 9.685     | 1272285 | 66395  | 50.099  |
| Total |           | 2539523 | 143091 | 100.000 |

mAU

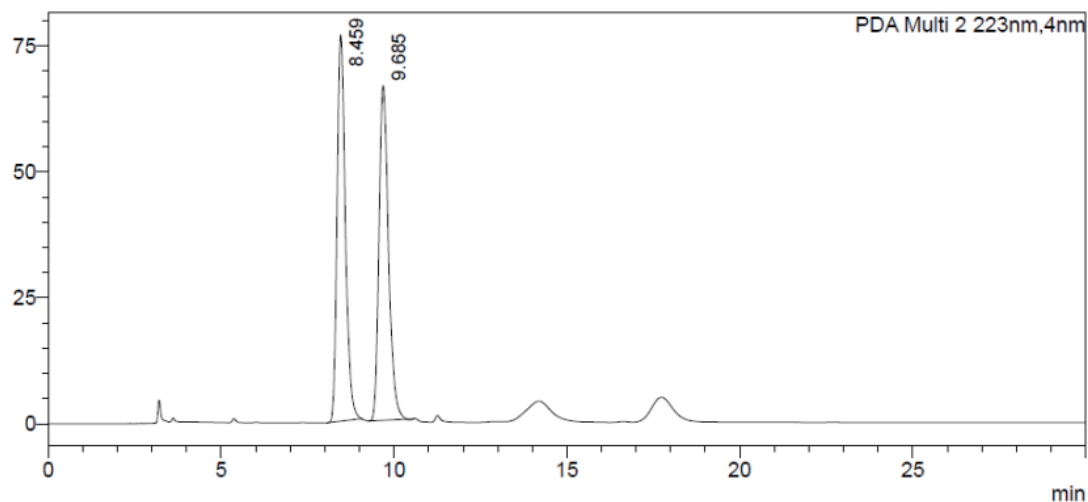

Scalemic: hw-7-67-OD-0.5%-1.0

PDA Ch2 223nm

| Peak# | Ret. Time | Area     | Height | Area%   |
|-------|-----------|----------|--------|---------|
| 1     | 8.211     | 14561337 | 894754 | 98.650  |
| 2     | 9.527     | 199279   | 12459  | 1.350   |
| Total |           | 14760616 | 907213 | 100.000 |

mAU

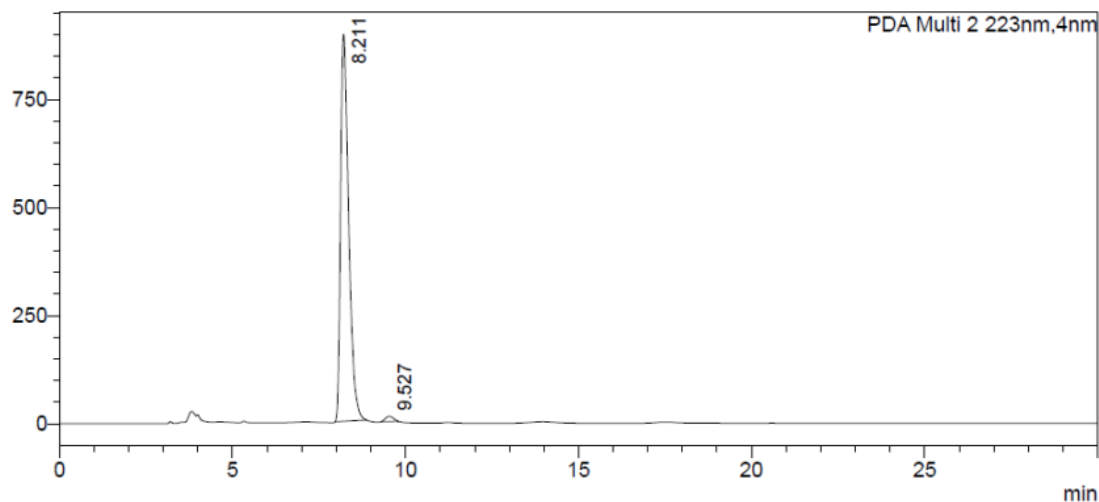

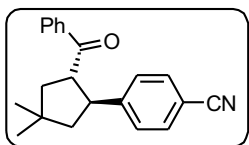

10

Racemic: hw-6-192c-tlc-AD-5.0%-1.0

PDA Ch2 223nm

| Peak# | Ret. Time | Area     | Height | Area%   |
|-------|-----------|----------|--------|---------|
| 1     | 6.393     | 6731948  | 454317 | 46.839  |
| 2     | 9.739     | 7640540  | 327922 | 53.161  |
| Total |           | 14372488 | 782238 | 100.000 |

mAU

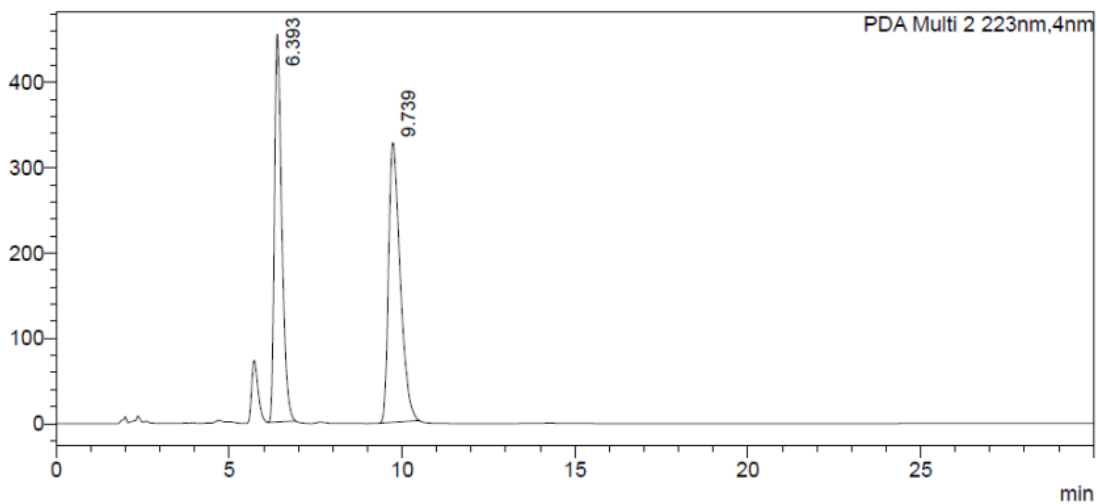

Scalemic: hw-7-87b-AD-5%-1.0

PDA Ch2 223nm

| Peak# | Ret. Time | Area    | Height | Area%   |
|-------|-----------|---------|--------|---------|
| 1     | 6.400     | 1690800 | 114905 | 94.254  |
| 2     | 9.749     | 103078  | 5187   | 5.746   |
| Total |           | 1793878 | 120092 | 100.000 |

mAU

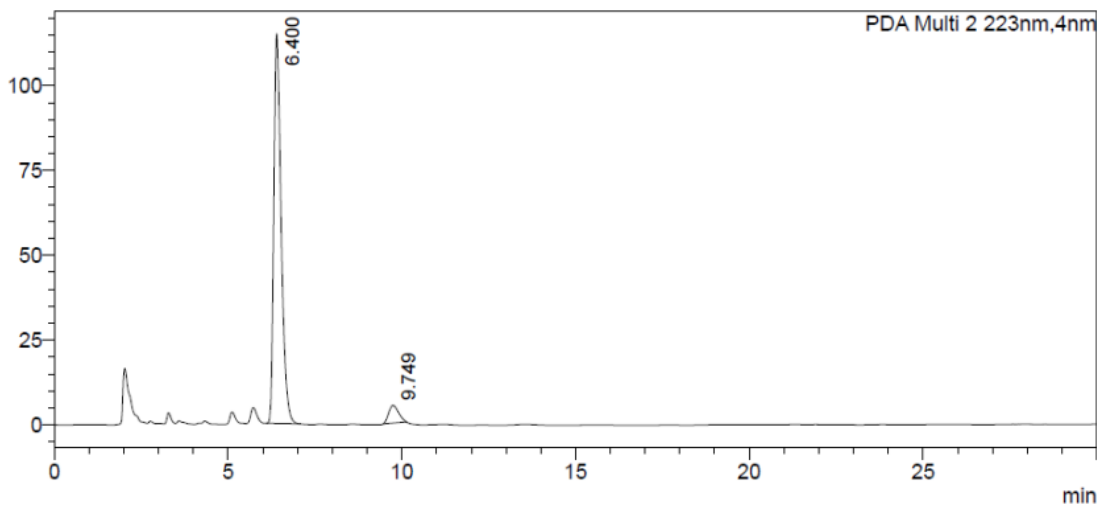



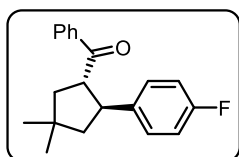

11

Racemic: hw-6-192b-AS-0%-0.3-60 min

| PDA Ch2 223nm |           |          |        |         |
|---------------|-----------|----------|--------|---------|
| Peak#         | Ret. Time | Area     | Height | Area%   |
| 1             | 24.434    | 7506414  | 174575 | 49.531  |
| 2             | 26.091    | 7648644  | 198619 | 50.469  |
| Total         |           | 15155059 | 373194 | 100.000 |

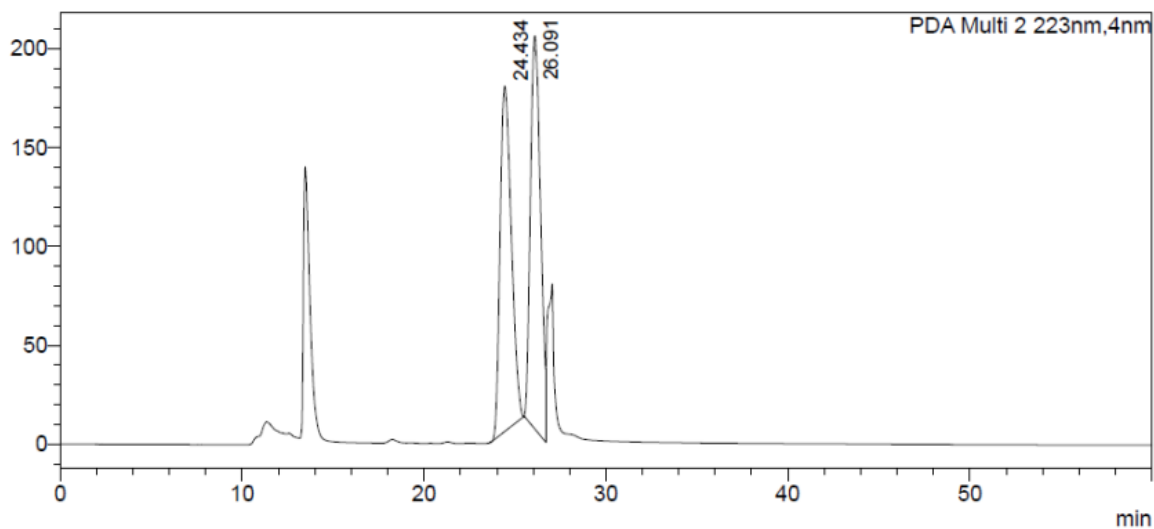

Scalemic: hw-6-179-re-AS-0%-0.3

| PDA Ch2 223nm |           |         |        |         |
|---------------|-----------|---------|--------|---------|
| Peak#         | Ret. Time | Area    | Height | Area%   |
| 1             | 24.234    | 8638950 | 192210 | 97.223  |
| 2             | 26.048    | 246783  | 7686   | 2.777   |
| Total         |           | 8885733 | 199896 | 100.000 |

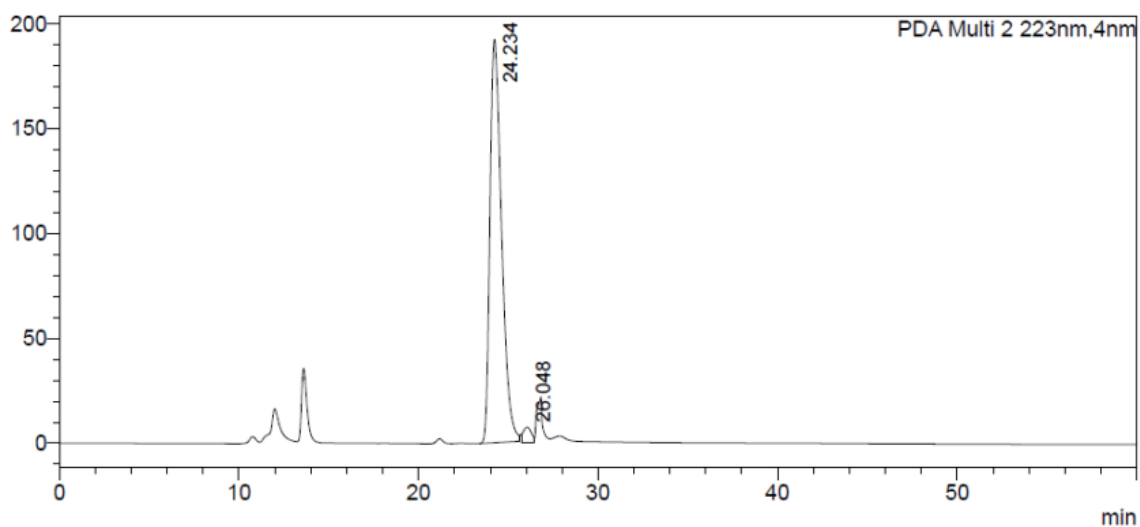

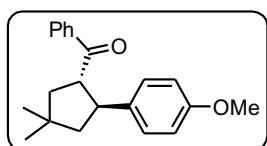

**12**

Racemic: hw-6-205b-AD-0.5%-1.0

PDA Ch2 223nm

| Peak# | Ret. Time | Area    | Height | Area%   |
|-------|-----------|---------|--------|---------|
| 1     | 10.816    | 4256596 | 160496 | 50.214  |
| 2     | 23.318    | 4220331 | 60477  | 49.786  |
| Total |           | 8476927 | 220974 | 100.000 |

mAU

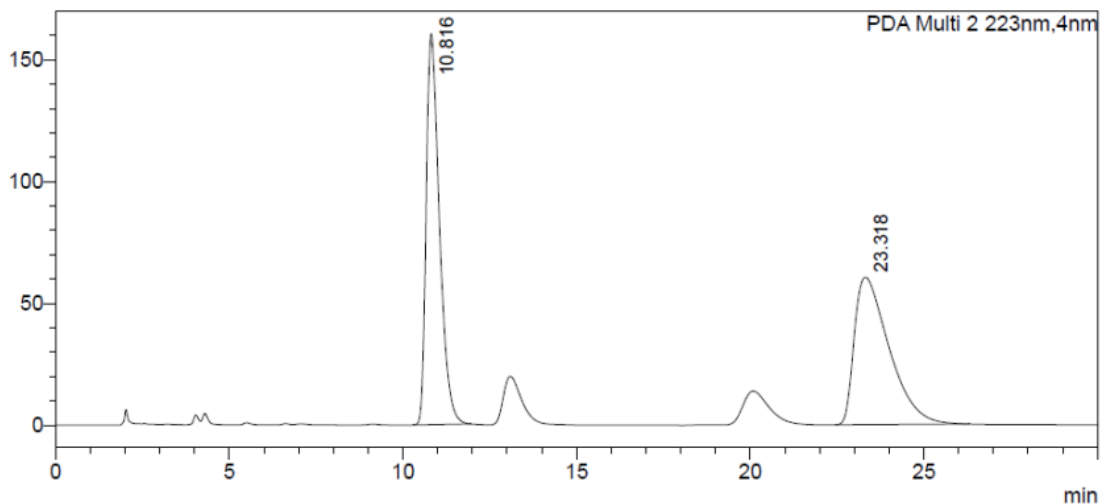

Scalemic: hw-6-203-AD-0.5%-1.0

PDA Ch2 223nm

| Peak# | Ret. Time | Area    | Height | Area%   |
|-------|-----------|---------|--------|---------|
| 1     | 10.767    | 7688800 | 295138 | 97.952  |
| 2     | 23.351    | 160786  | 3342   | 2.048   |
| Total |           | 7849586 | 298480 | 100.000 |

mAU

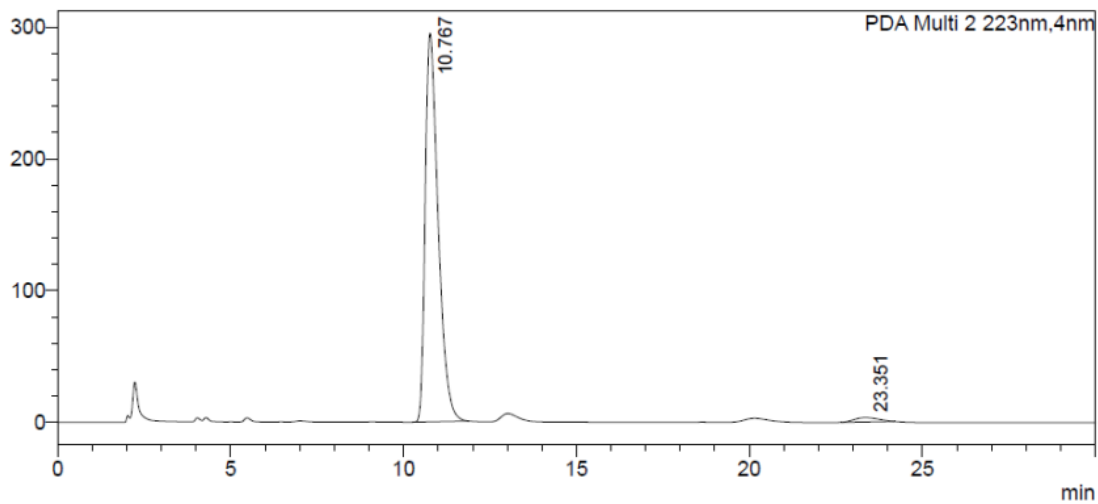

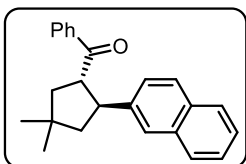

13

Racemic: hw-6-200-IA-2%-1.0-30 min

PDA Ch2 223nm

| Peak# | Ret. Time | Area     | Height  | Area%   |
|-------|-----------|----------|---------|---------|
| 1     | 7.466     | 29790874 | 1745317 | 49.285  |
| 2     | 11.973    | 30654868 | 1482779 | 50.715  |
| Total |           | 60445743 | 3228096 | 100.000 |

mAU

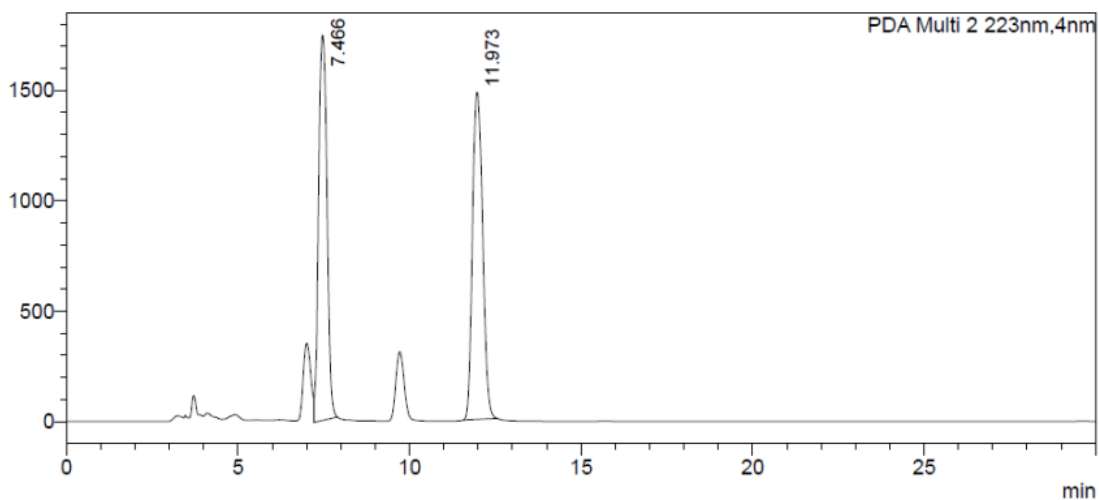

Scalemic: hw-6-193-re-IA-2%-1.0

PDA Ch2 223nm

| Peak# | Ret. Time | Area     | Height  | Area%   |
|-------|-----------|----------|---------|---------|
| 1     | 7.472     | 16356772 | 1061854 | 97.008  |
| 2     | 11.986    | 504549   | 27988   | 2.992   |
| Total |           | 16861320 | 1089841 | 100.000 |

mAU

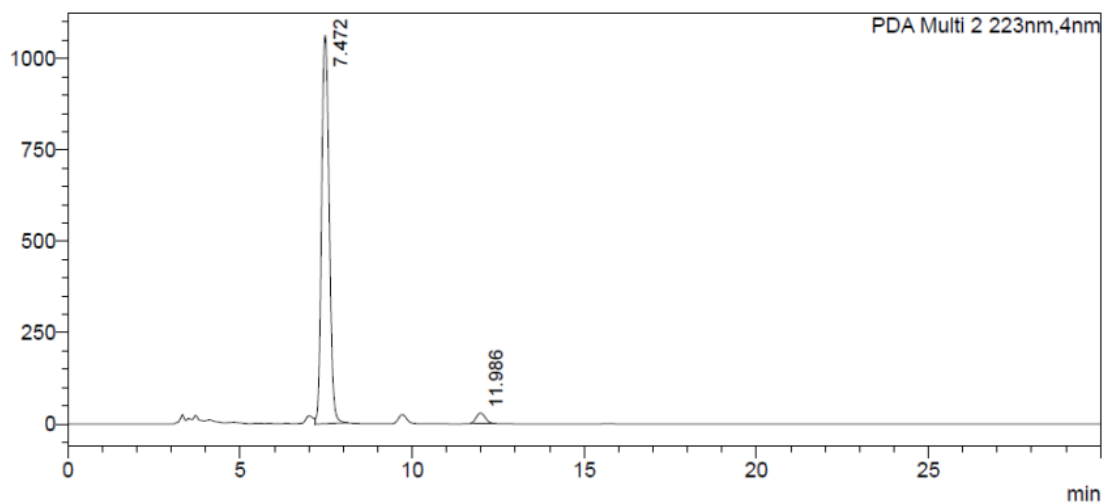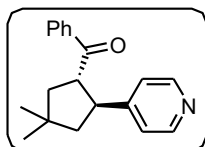

14

Racemic: hw-7-25a-IA-12%-1.2

PDA Ch2 223nm

| Peak# | Ret. Time | Area    | Height | Area%   |
|-------|-----------|---------|--------|---------|
| 1     | 7.298     | 1390235 | 93651  | 49.888  |
| 2     | 13.279    | 1396484 | 51991  | 50.112  |
| Total |           | 2786719 | 145641 | 100.000 |

mAU

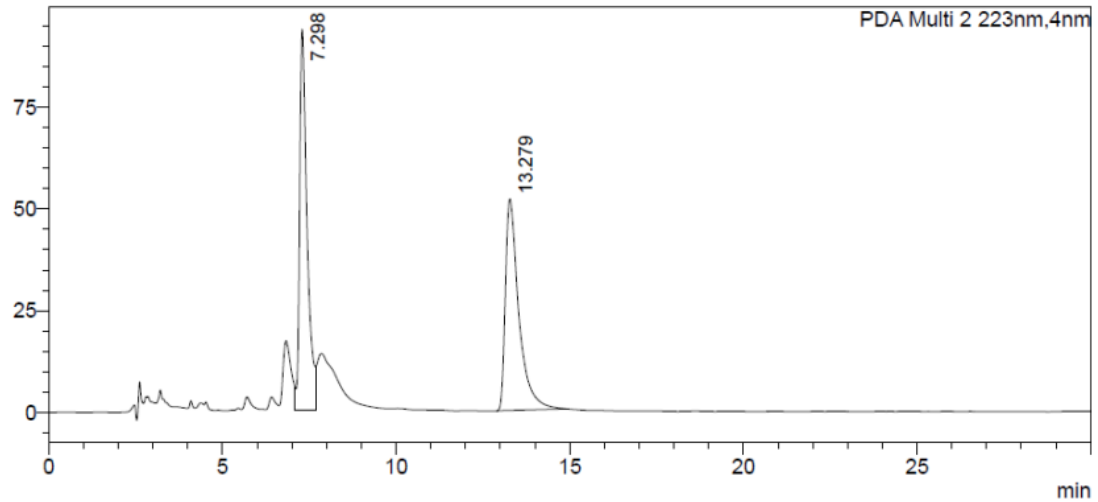

Scalemic: hw-7-23-IA-12%-1.2

PDA Ch2 223nm

| Peak# | Ret. Time | Area    | Height | Area%   |
|-------|-----------|---------|--------|---------|
| 1     | 7.294     | 1624668 | 105271 | 89.553  |
| 2     | 13.453    | 189534  | 7005   | 10.447  |
| Total |           | 1814202 | 112277 | 100.000 |

mAU

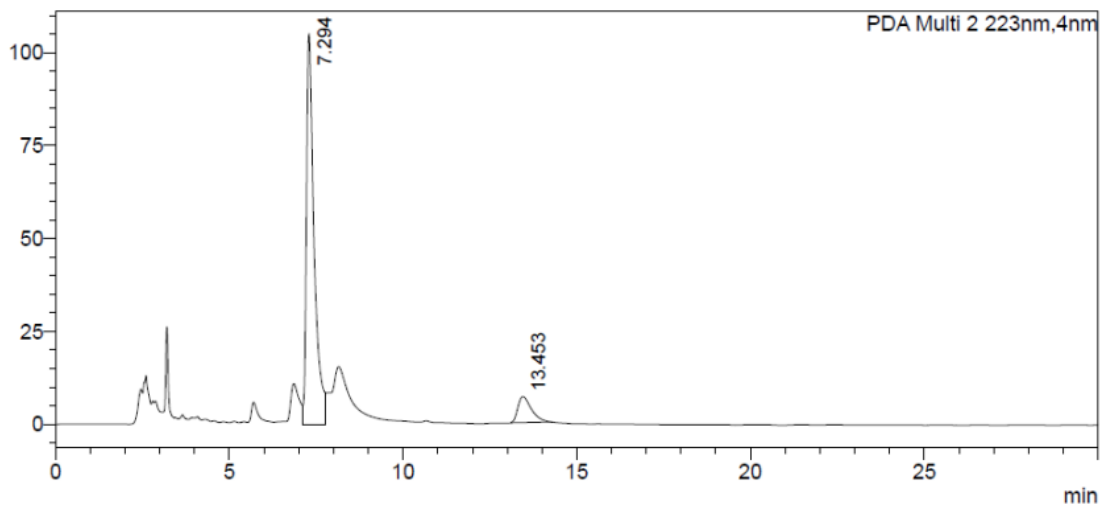

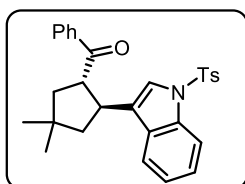

15

Racemic: hw-6-201-AD-6%-1.0

| PDA Ch2 223nm |           |         |        |         |
|---------------|-----------|---------|--------|---------|
| Peak#         | Ret. Time | Area    | Height | Area%   |
| 1             | 6.740     | 4754081 | 240392 | 49.729  |
| 2             | 10.079    | 4805871 | 171629 | 50.271  |
| Total         |           | 9559952 | 412021 | 100.000 |

mAU

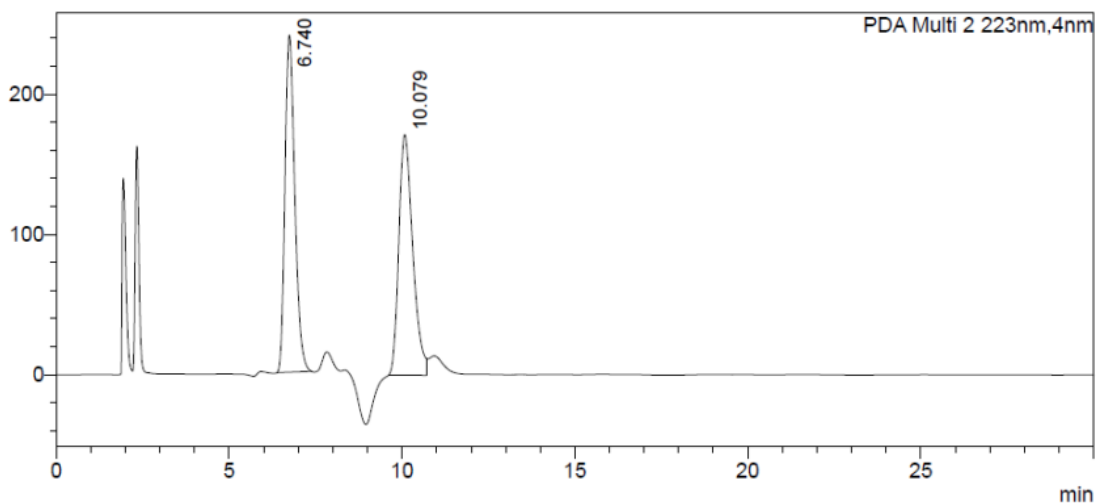

Scalemic: hw-6-199-AD-6%-1.0

| PDA Ch2 223nm |           |         |        |         |
|---------------|-----------|---------|--------|---------|
| Peak#         | Ret. Time | Area    | Height | Area%   |
| 1             | 6.741     | 1204034 | 71914  | 99.176  |
| 2             | 10.010    | 10008   | 612    | 0.824   |
| Total         |           | 1214043 | 72525  | 100.000 |

mAU

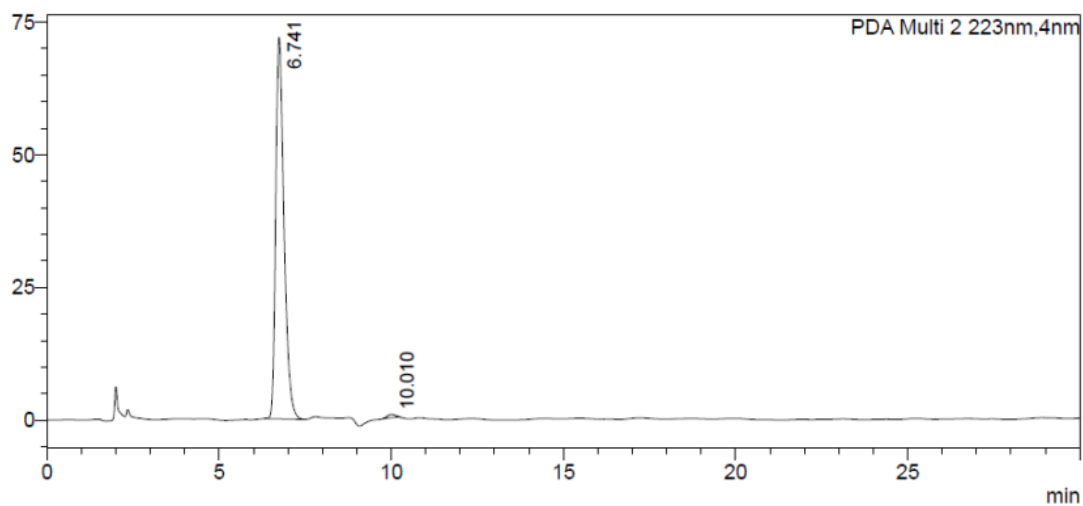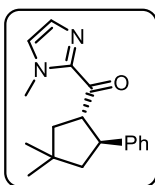

Racemic: hw-7-13-IA-0.5%-1.0

PDA Ch2 223nm

| Peak# | Ret. Time | Area    | Height | Area%   |
|-------|-----------|---------|--------|---------|
| 1     | 19.526    | 1630493 | 30997  | 46.799  |
| 2     | 24.357    | 1853552 | 25618  | 53.201  |
| Total |           | 3484046 | 56615  | 100.000 |

mAU

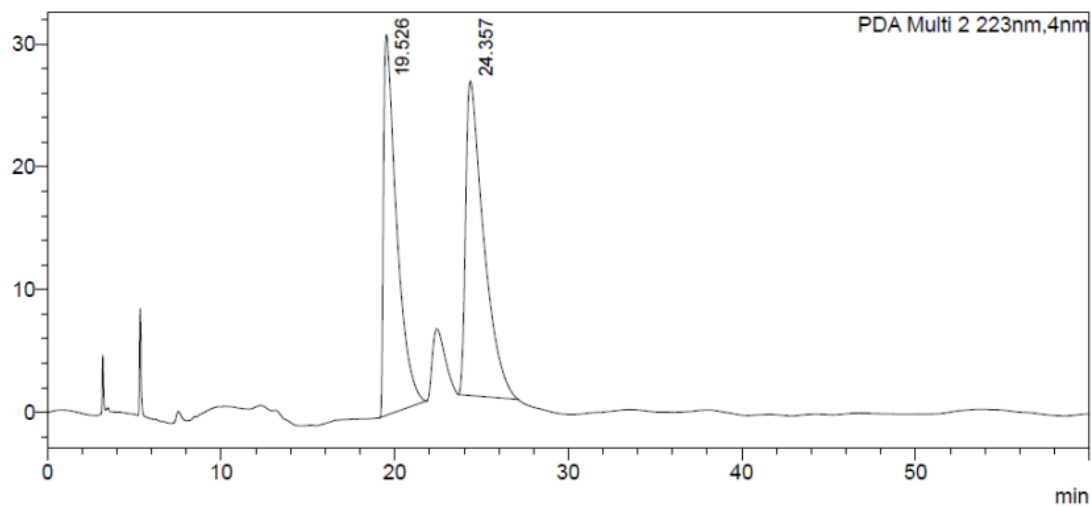

Scalemic: hw-7-3-IA-0.5%-1.0

PDA Ch2 223nm

| Peak# | Ret. Time | Area    | Height | Area%   |
|-------|-----------|---------|--------|---------|
| 1     | 19.153    | 310251  | 7674   | 5.757   |
| 2     | 22.659    | 5079095 | 70909  | 94.243  |
| Total |           | 5389346 | 78583  | 100.000 |

mAU

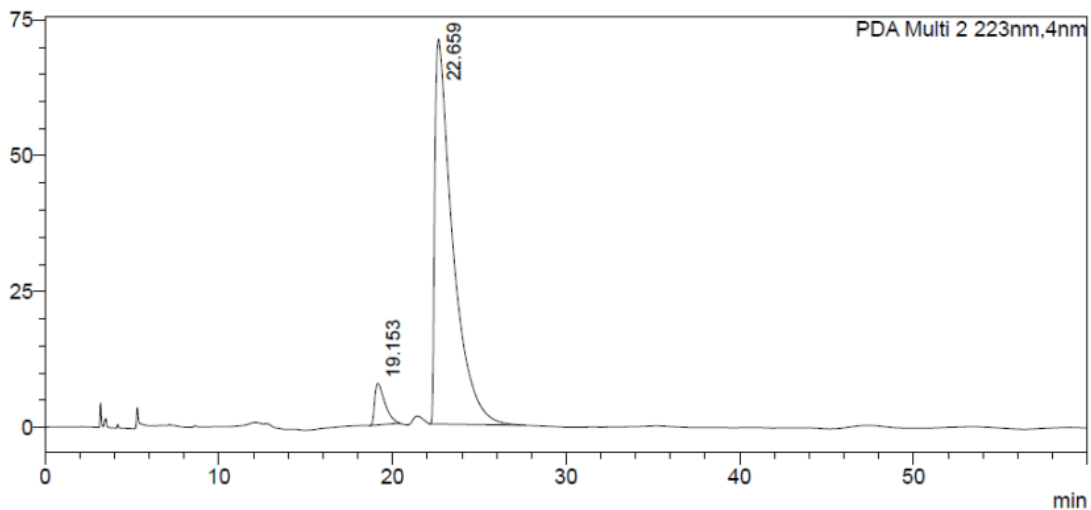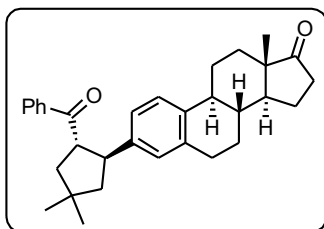

17

Racemic: hw-7-25b-AD-3%-1.0

| PDA Ch2 223nm |           |         |        |         |
|---------------|-----------|---------|--------|---------|
| Peak#         | Ret. Time | Area    | Height | Area%   |
| 1             | 8.089     | 1661435 | 73179  | 57.446  |
| 2             | 9.427     | 1230721 | 41594  | 42.554  |
| Total         |           | 2892157 | 114772 | 100.000 |

mAU

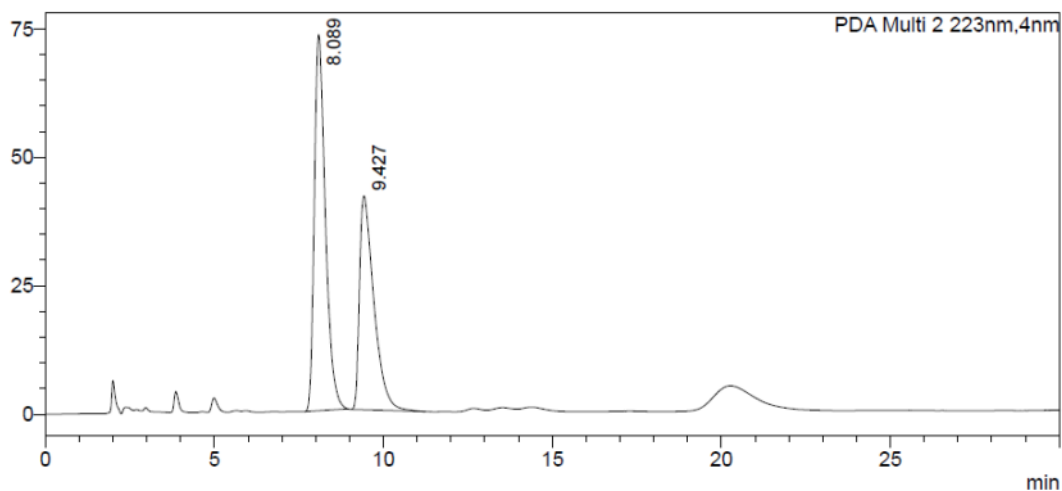

Scalemic: hw-7-22-AD-3%-1.0

| PDA Ch2 223nm |           |         |        |         |
|---------------|-----------|---------|--------|---------|
| Peak#         | Ret. Time | Area    | Height | Area%   |
| 1             | 8.113     | 4260899 | 187205 | 98.207  |
| 2             | 9.653     | 77782   | 3261   | 1.793   |
| Total         |           | 4338680 | 190466 | 100.000 |

mAU

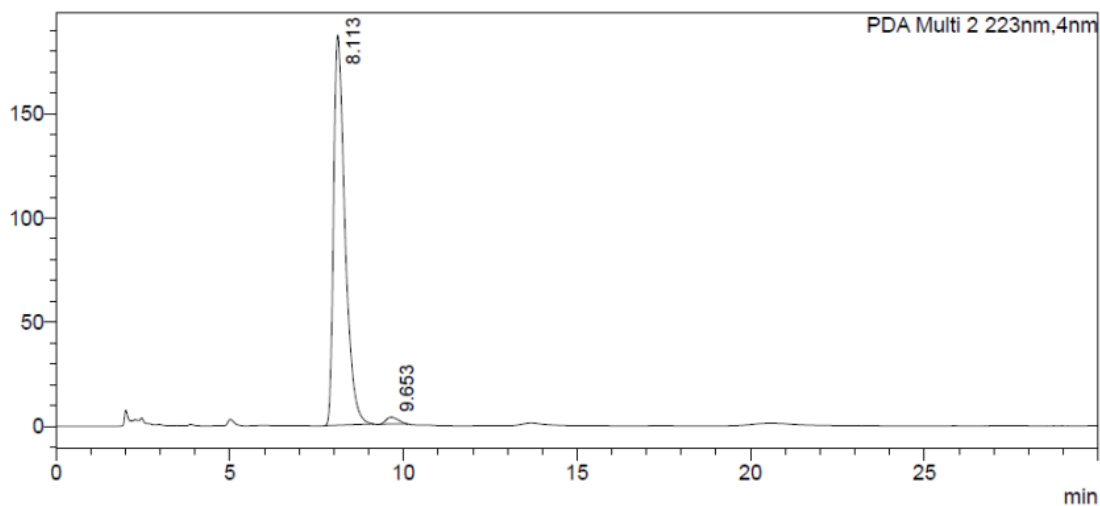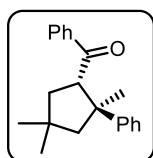

18

Racemic: hw-6-196b-tlc-AD-0.5%-1.0

| PDA Ch2 223nm |           |        |        |         |
|---------------|-----------|--------|--------|---------|
| Peak#         | Ret. Time | Area   | Height | Area%   |
| 1             | 5.153     | 505350 | 48199  | 50.549  |
| 2             | 5.973     | 494371 | 40777  | 49.451  |
| Total         |           | 999721 | 88976  | 100.000 |

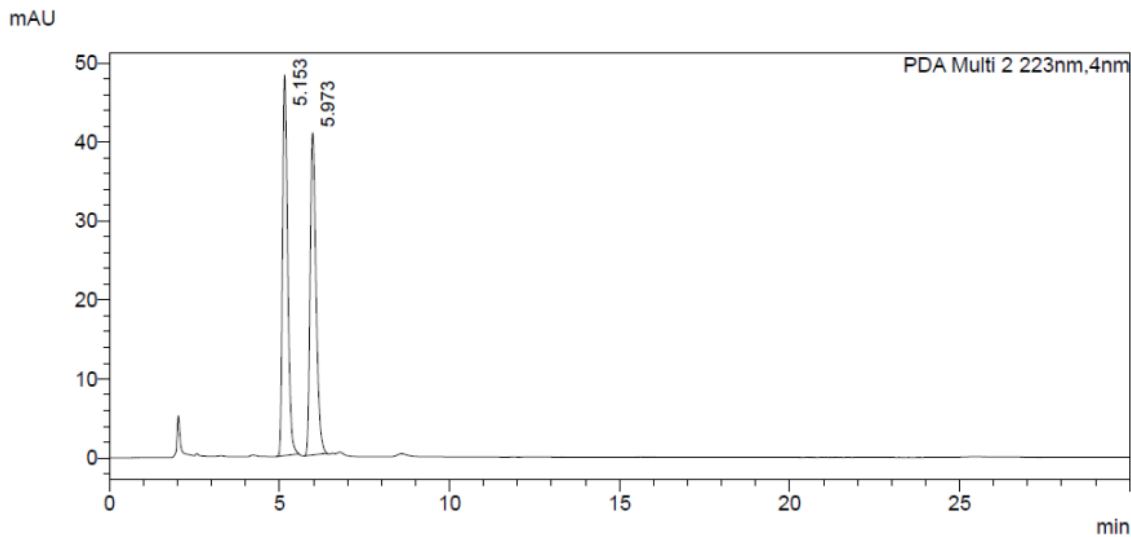

Scalemic: hw-6-186-re-AD-0.5%-1.0

| PDA Ch2 223nm |           |         |        |         |
|---------------|-----------|---------|--------|---------|
| Peak#         | Ret. Time | Area    | Height | Area%   |
| 1             | 5.157     | 1787600 | 166507 | 97.758  |
| 2             | 5.993     | 40989   | 4033   | 2.242   |
| Total         |           | 1828589 | 170540 | 100.000 |

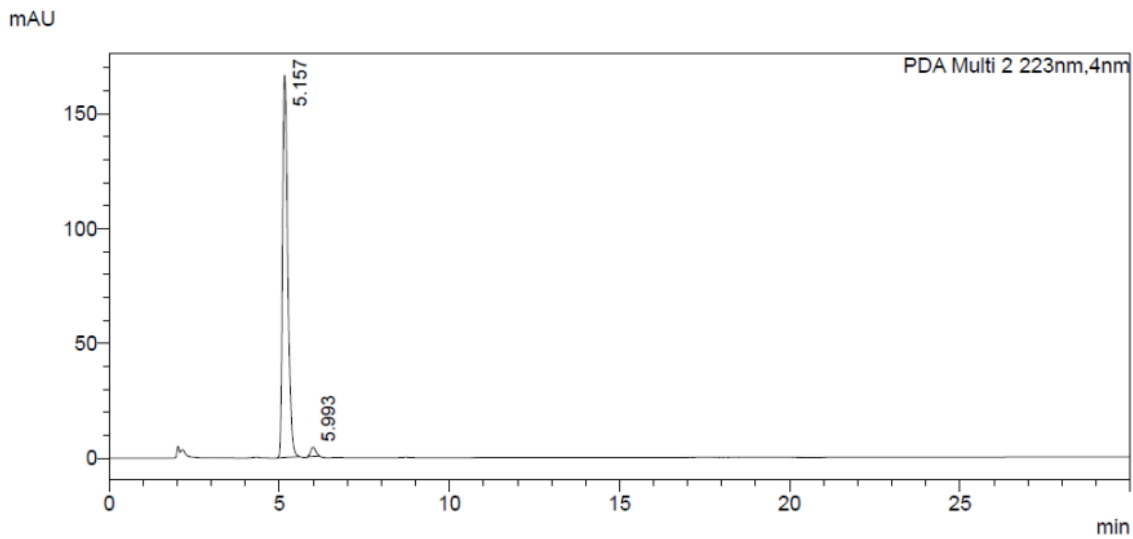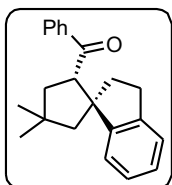



19

Racemic: hw-7-7-AD-0.2%-1.0

PDA Ch2 223nm

| Peak# | Ret. Time | Area    | Height | Area%   |
|-------|-----------|---------|--------|---------|
| 1     | 6.121     | 4532634 | 278692 | 49.732  |
| 2     | 6.872     | 4581552 | 213664 | 50.268  |
| Total |           | 9114187 | 492356 | 100.000 |

mAU

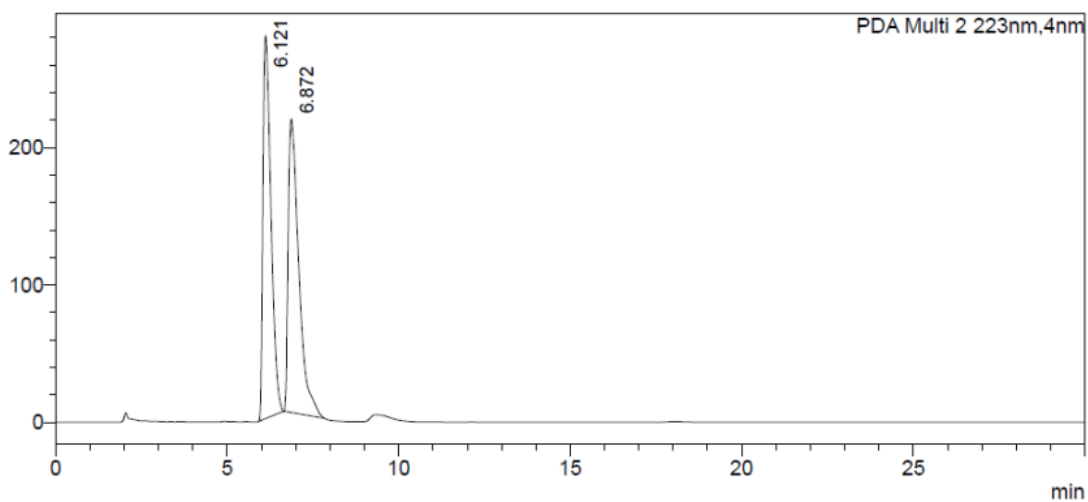

Scalemic: hw-7-6-AD-0.2%-1.0

PDA Ch2 223nm

| Peak# | Ret. Time | Area    | Height | Area%   |
|-------|-----------|---------|--------|---------|
| 1     | 6.088     | 3960254 | 244445 | 97.868  |
| 2     | 7.066     | 86282   | 4575   | 2.132   |
| Total |           | 4046535 | 249020 | 100.000 |

mAU

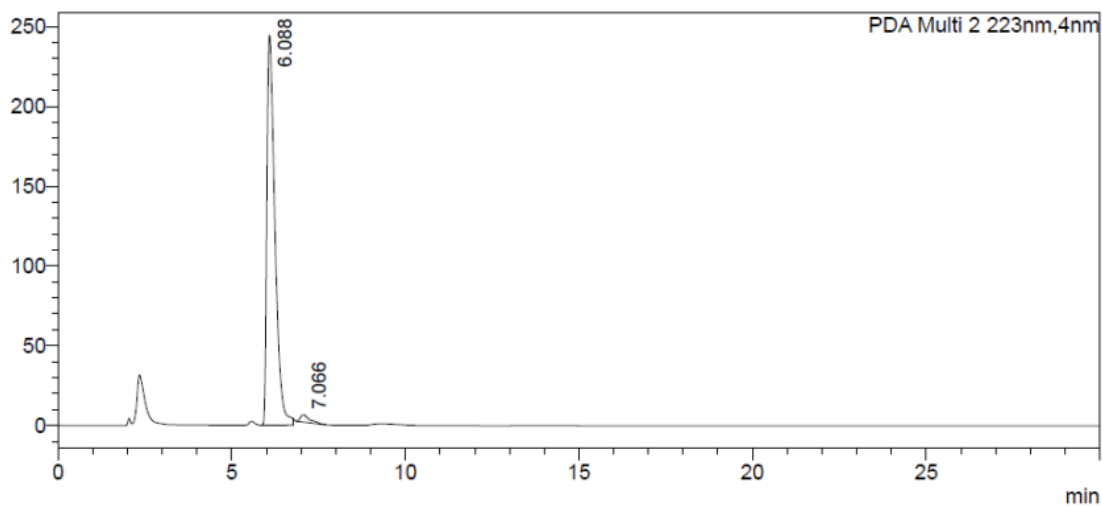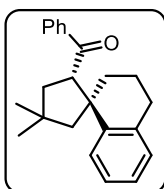

20

Racemic: hw-6-208-AD-0.5%-1.0

| PDA Ch2 223nm |           |         |        |         |
|---------------|-----------|---------|--------|---------|
| Peak#         | Ret. Time | Area    | Height | Area%   |
| 1             | 6.113     | 2457839 | 177291 | 49.032  |
| 2             | 6.807     | 2554892 | 144492 | 50.968  |
| Total         |           | 5012731 | 321783 | 100.000 |

mAU

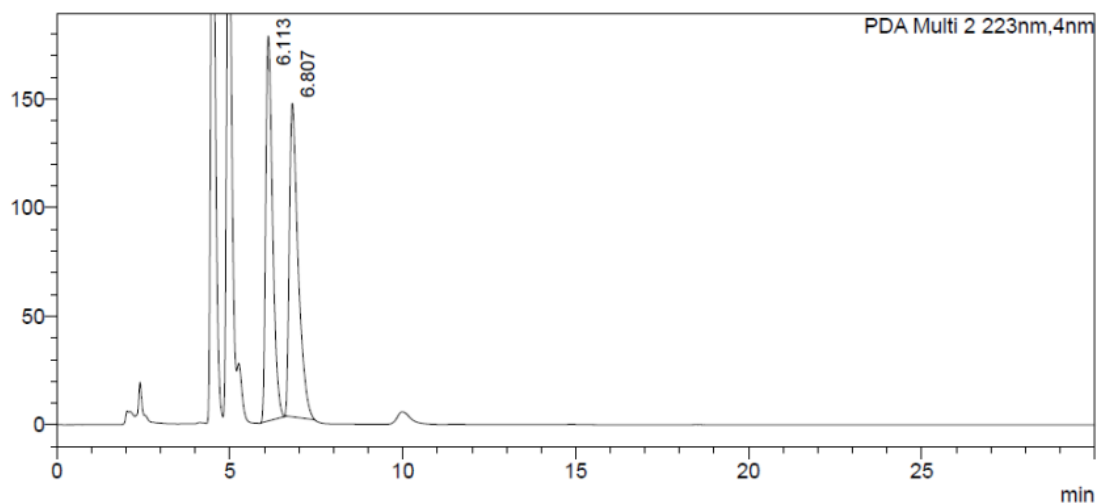

Scaemic: hw-7-36-AD-0.5%-1.0

| PDA Ch2 223nm |           |         |        |         |
|---------------|-----------|---------|--------|---------|
| Peak#         | Ret. Time | Area    | Height | Area%   |
| 1             | 6.139     | 6893107 | 464760 | 95.047  |
| 2             | 7.096     | 359204  | 21149  | 4.953   |
| Total         |           | 7252311 | 485909 | 100.000 |

mAU

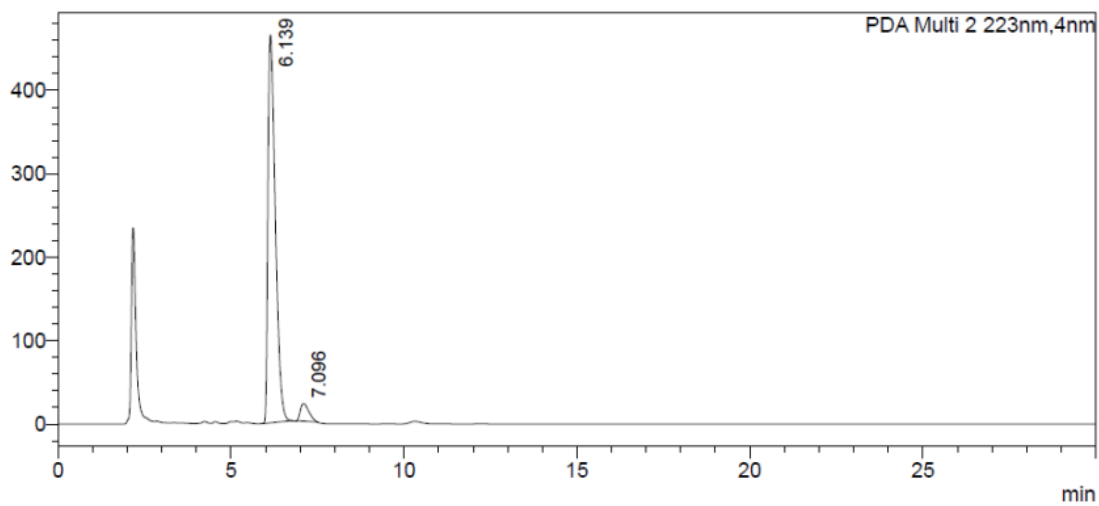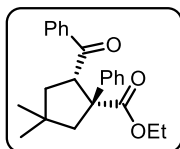

21

Racemic: hw-7-37-AD-2%-1.0

PDA Ch2 223nm

| Peak# | Ret. Time | Area    | Height | Area%   |
|-------|-----------|---------|--------|---------|
| 1     | 8.933     | 2746578 | 131089 | 49.896  |
| 2     | 16.461    | 2758013 | 70861  | 50.104  |
| Total |           | 5504591 | 201950 | 100.000 |

mAU

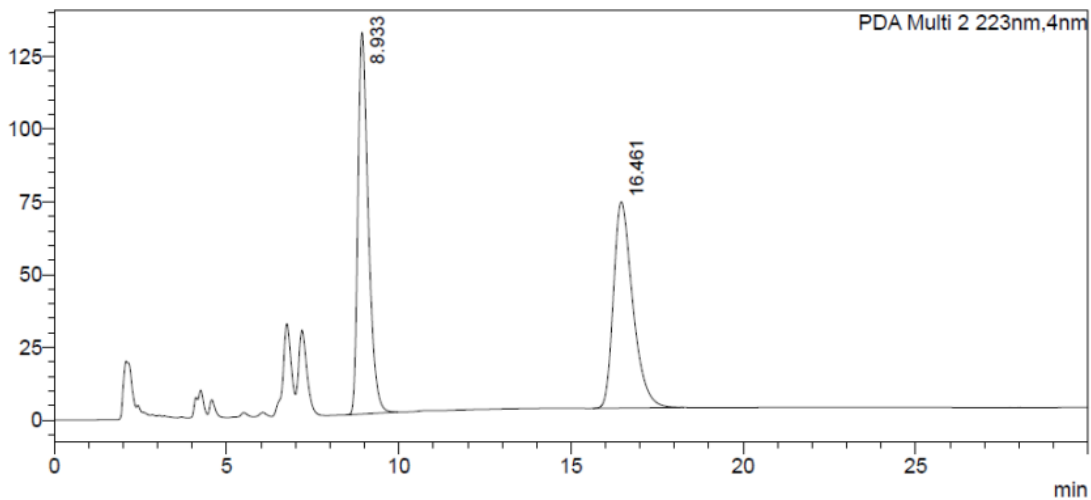

Scalemic: hw-7-27-AD-2%-1.0

PDA Ch2 223nm

| Peak# | Ret. Time | Area     | Height | Area%   |
|-------|-----------|----------|--------|---------|
| 1     | 9.125     | 1137252  | 53625  | 9.944   |
| 2     | 16.866    | 10299583 | 258958 | 90.056  |
| Total |           | 11436835 | 312583 | 100.000 |

mAU

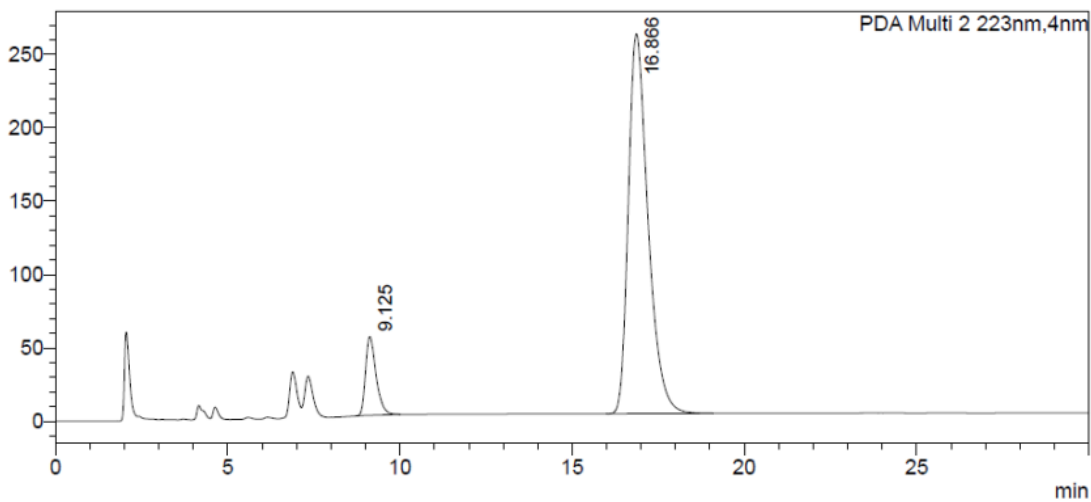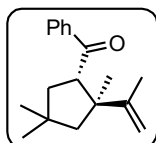

22

Racemic: hw-6-205c-tlc-AS-0.1%-1.0

PDA Ch2 223nm

| Peak# | Ret. Time | Area    | Height | Area%   |
|-------|-----------|---------|--------|---------|
| 1     | 6.124     | 1500656 | 97902  | 50.134  |
| 2     | 7.026     | 1492615 | 72290  | 49.866  |
| Total |           | 2993270 | 170191 | 100.000 |

mAU

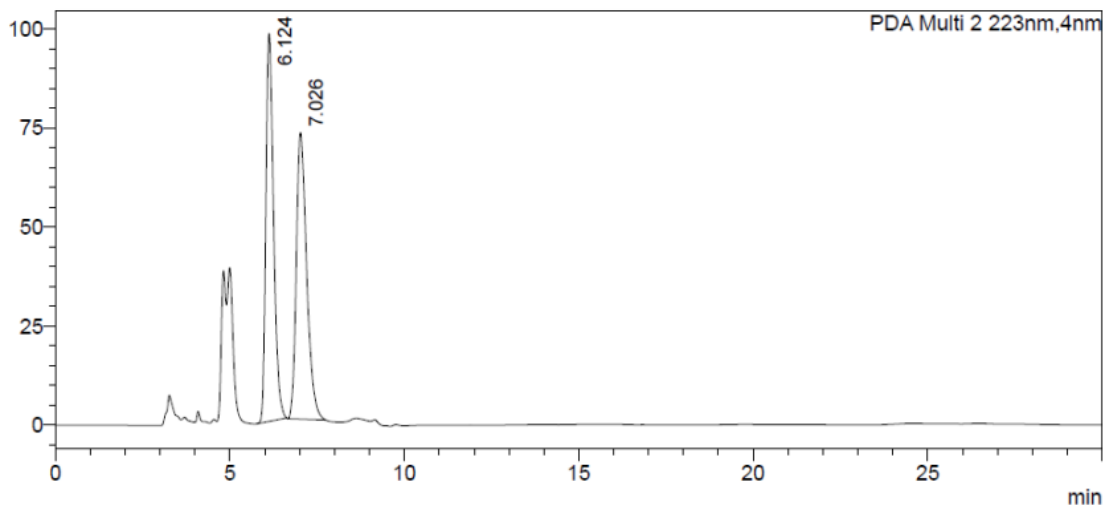

Scaemic: hw-6-204-AS-0.1%-1.0

PDA Ch2 223nm

| Peak# | Ret. Time | Area    | Height | Area%   |
|-------|-----------|---------|--------|---------|
| 1     | 6.093     | 2858284 | 183399 | 97.853  |
| 2     | 7.076     | 62705   | 3676   | 2.147   |
| Total |           | 2920989 | 187076 | 100.000 |

mAU

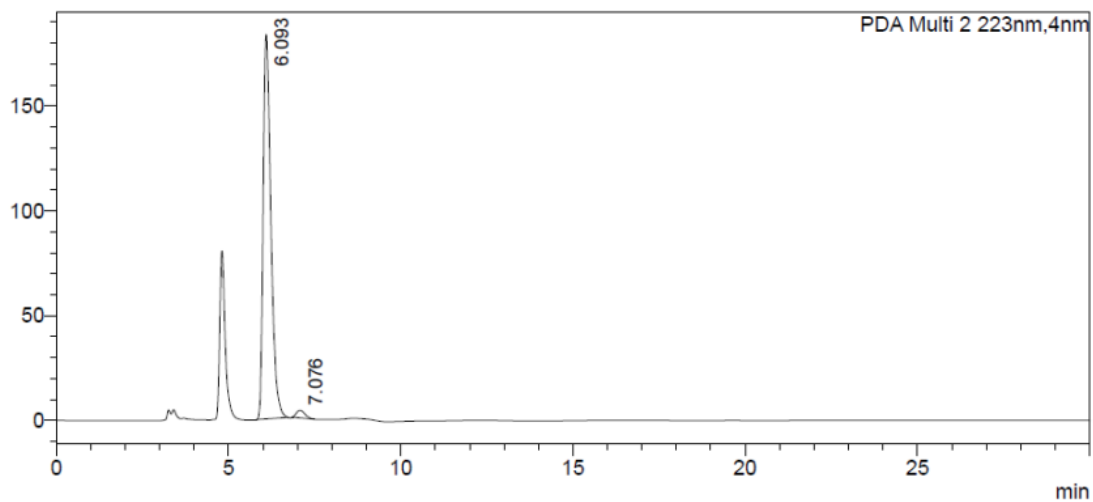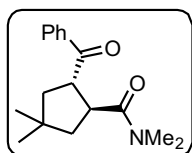

23

Racemic: hw-7-81-AD-12%-1.0

PDA Ch2 223nm

| Peak# | Ret. Time | Area    | Height | Area%   |
|-------|-----------|---------|--------|---------|
| 1     | 4.034     | 2752773 | 282731 | 49.766  |
| 2     | 5.192     | 2778664 | 219906 | 50.234  |
| Total |           | 5531437 | 502637 | 100.000 |

mAU

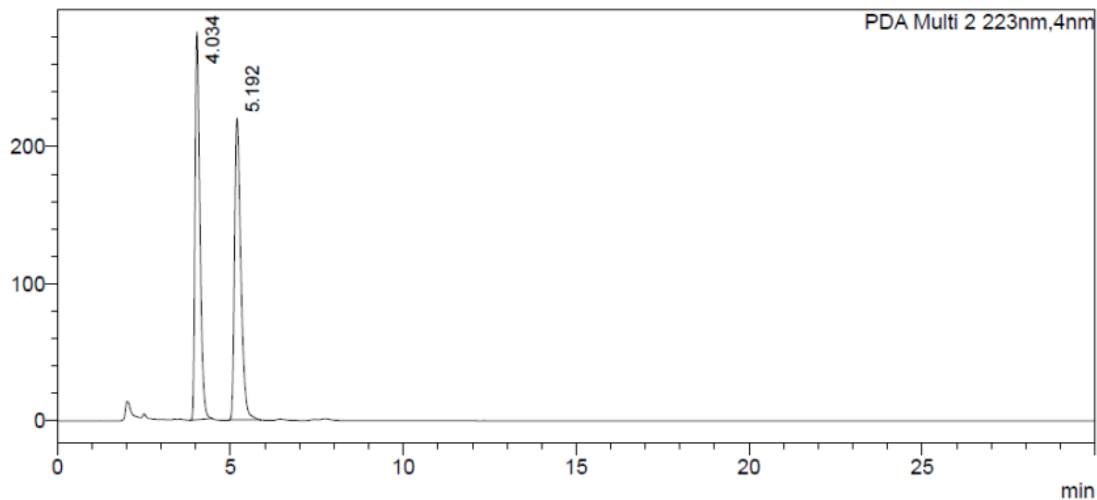

Scaemic: hw-7-79-AD-12%-1.0

PDA Ch2 223nm

| Peak# | Ret. Time | Area    | Height | Area%   |
|-------|-----------|---------|--------|---------|
| 1     | 4.037     | 1903961 | 196839 | 97.935  |
| 2     | 5.196     | 40138   | 3402   | 2.065   |
| Total |           | 1944099 | 200241 | 100.000 |

mAU

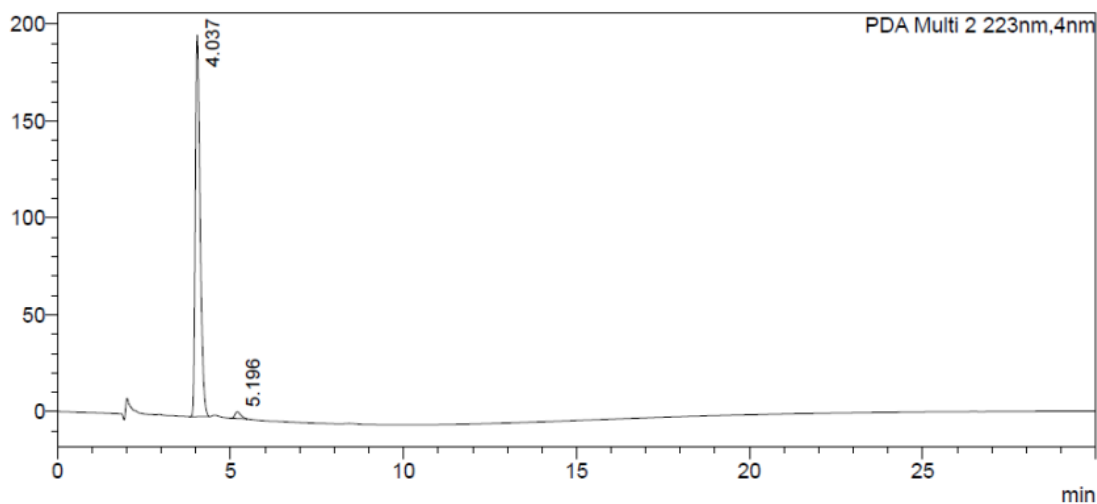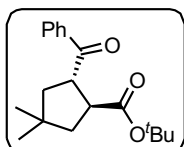

24

Racemic: hw-6-36a-tlc-1-IA-0.5%-1.0

| PDA Ch2 223nm |           |         |        |         |
|---------------|-----------|---------|--------|---------|
| Peak#         | Ret. Time | Area    | Height | Area%   |
| 1             | 7.620     | 2543220 | 286463 | 50.183  |
| 2             | 8.277     | 2524709 | 249934 | 49.817  |
| Total         |           | 5067929 | 536397 | 100.000 |

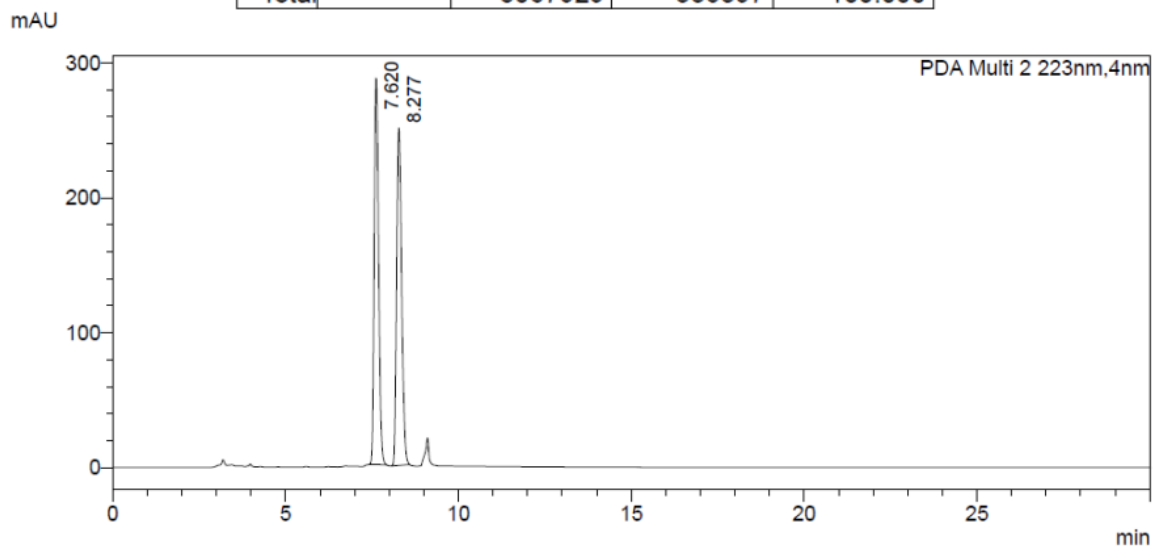

Scaemic: hw-6-157a-IA-0.5%-1.0

| PDA Ch2 234nm |           |          |         |         |
|---------------|-----------|----------|---------|---------|
| Peak#         | Ret. Time | Area     | Height  | Area%   |
| 1             | 7.442     | 15252295 | 1451194 | 86.394  |
| 2             | 8.059     | 2402046  | 277662  | 13.606  |
| Total         |           | 17654341 | 1728857 | 100.000 |

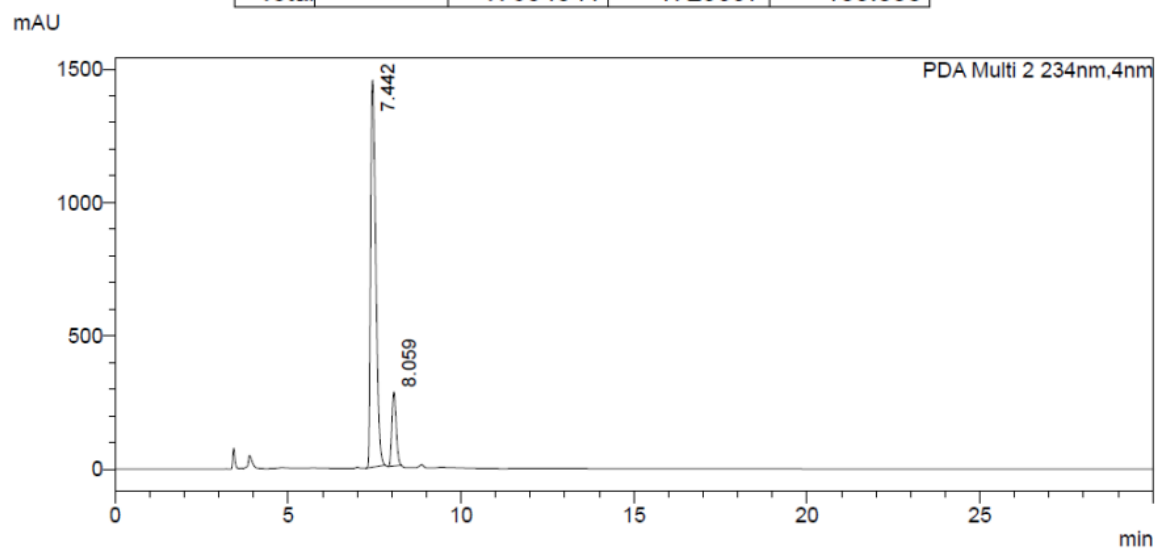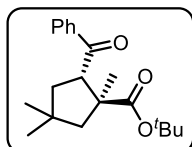

25

Racemic: hw-7-35b-AD-0.5%-1.0

PDA Ch2 223nm

| Peak# | Ret. Time | Area    | Height | Area%   |
|-------|-----------|---------|--------|---------|
| 1     | 3.693     | 2960193 | 355948 | 49.589  |
| 2     | 4.249     | 3009206 | 297130 | 50.411  |
| Total |           | 5969399 | 653079 | 100.000 |

mAU

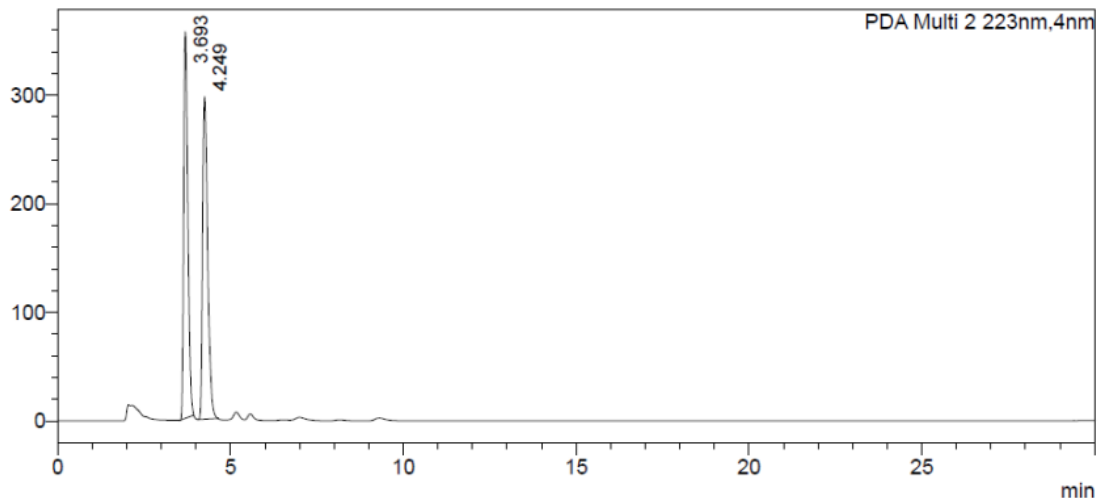

Scaemic: hw-7-30-AD-0.5%-1.0

PDA Ch2 223nm

| Peak# | Ret. Time | Area    | Height | Area%   |
|-------|-----------|---------|--------|---------|
| 1     | 3.701     | 2815939 | 335156 | 82.569  |
| 2     | 4.291     | 594483  | 62593  | 17.431  |
| Total |           | 3410422 | 397749 | 100.000 |

mAU

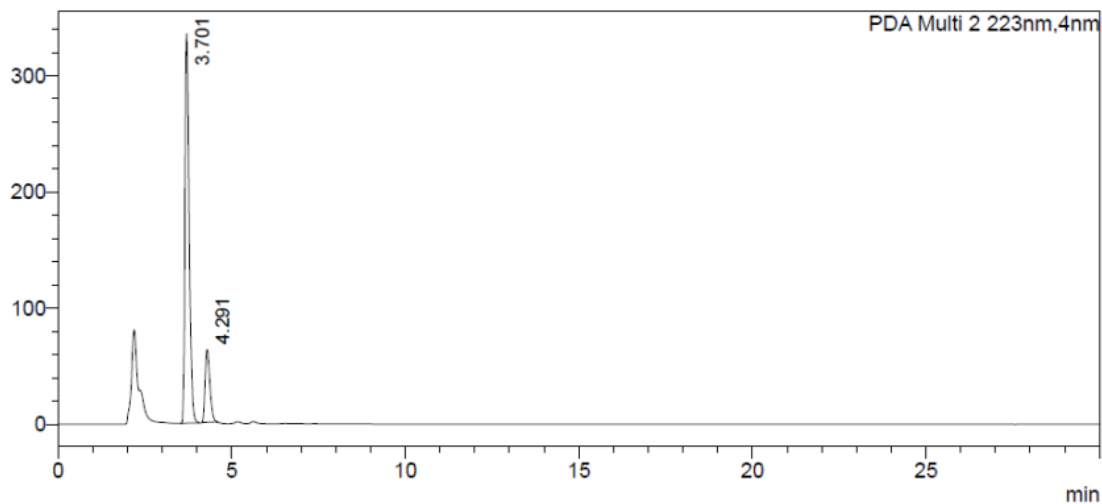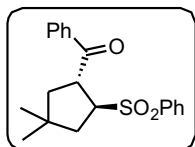

26

Racemic: hw-6-205a-AD-6%-1.0

PDA Ch2 250nm

| Peak# | Ret. Time | Area    | Height | Area%   |
|-------|-----------|---------|--------|---------|
| 1     | 11.121    | 4780492 | 162666 | 49.952  |
| 2     | 14.482    | 4789646 | 130416 | 50.048  |
| Total |           | 9570138 | 293082 | 100.000 |

mAU

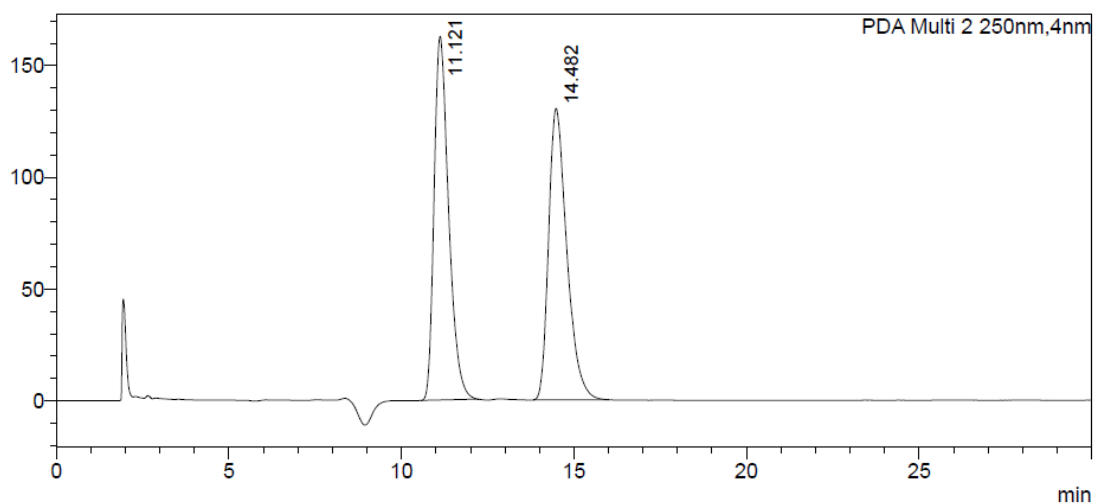

Scalemic: hw-7-167b-AD-6%-1.0

PDA Ch2 250nm

| Peak# | Ret. Time | Area   | Height | Area%   |
|-------|-----------|--------|--------|---------|
| 1     | 10.918    | 234425 | 9008   | 24.755  |
| 2     | 14.137    | 712547 | 20929  | 75.245  |
| Total |           | 946972 | 29937  | 100.000 |

mAU

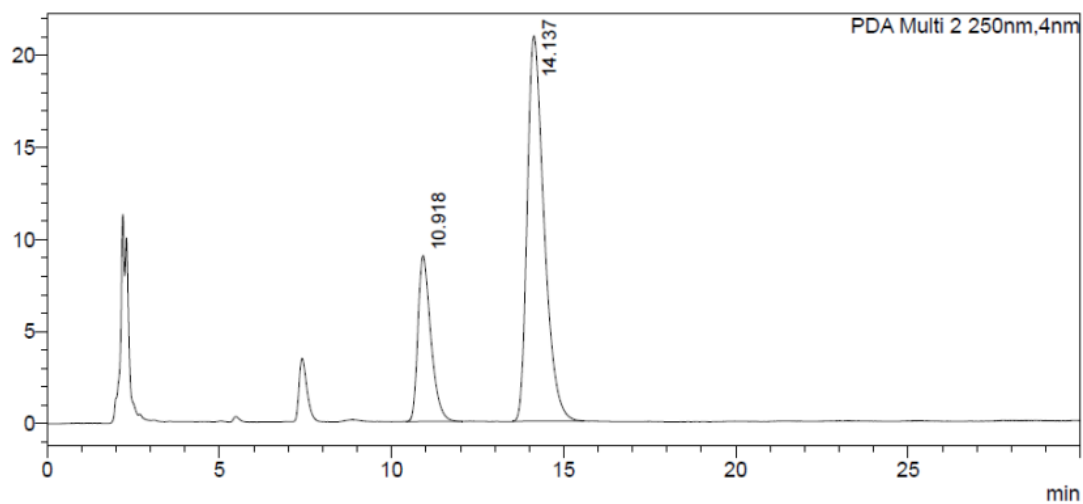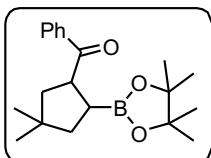



27

Racemic: hw-7-35a-AD-0.5%-1.0

PDA Ch2 223nm

| Peak# | Ret. Time | Area    | Height | Area%   |
|-------|-----------|---------|--------|---------|
| 1     | 5.298     | 1426500 | 118271 | 54.759  |
| 2     | 7.434     | 1178573 | 74357  | 45.241  |
| Total |           | 2605073 | 192628 | 100.000 |

mAU

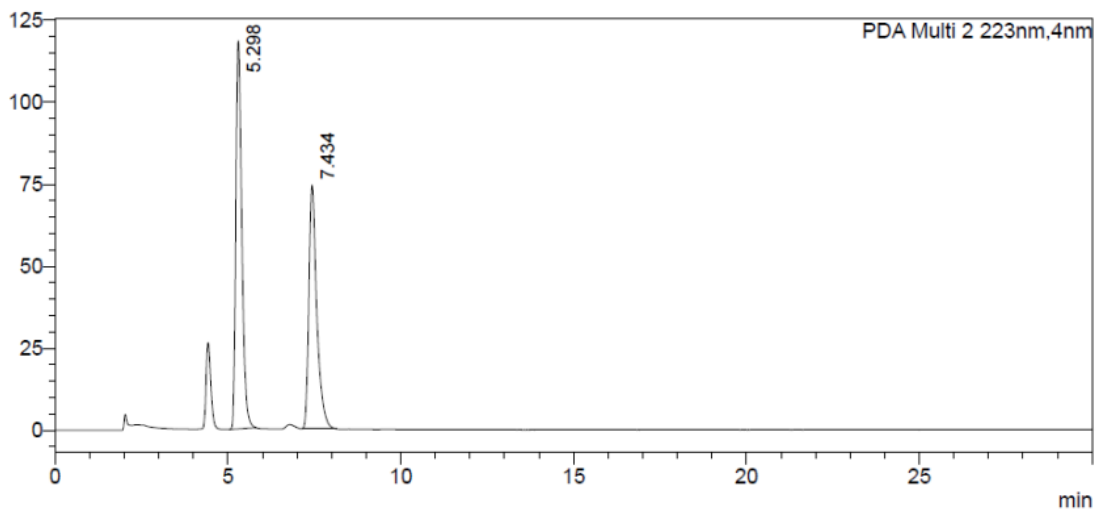

Scalemic: hw-7-161-AD-0.5%-1.0

PDA Ch2 223nm

| Peak# | Ret. Time | Area   | Height | Area%   |
|-------|-----------|--------|--------|---------|
| 1     | 5.362     | 138086 | 12311  | 27.129  |
| 2     | 7.564     | 370912 | 19944  | 72.871  |
| Total |           | 508998 | 32255  | 100.000 |

mAU

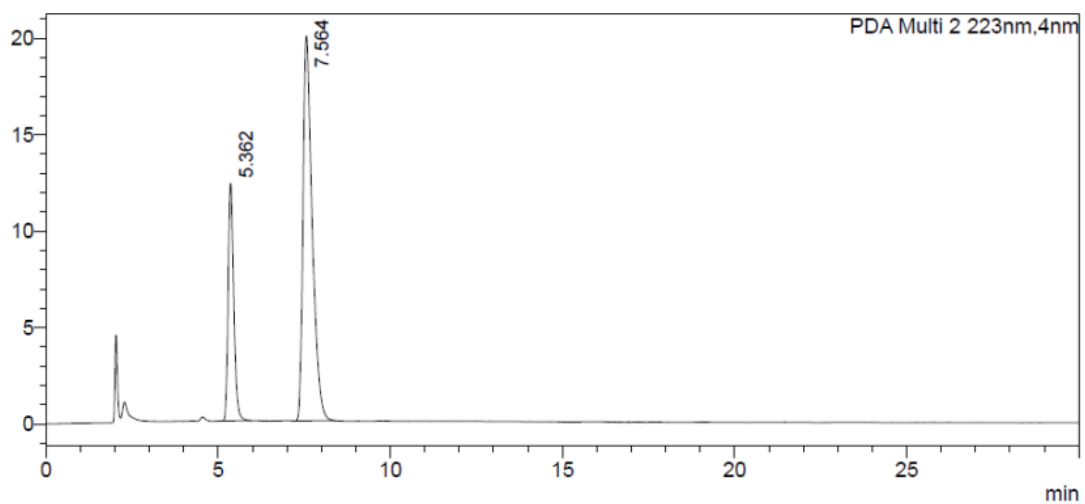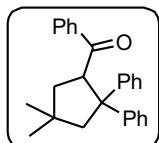

28

Racemic: hw-7-12b-tlc-AD-1%-1.0

PDA Ch2 223nm

| Peak# | Ret. Time | Area    | Height | Area%   |
|-------|-----------|---------|--------|---------|
| 1     | 3.812     | 4593506 | 382348 | 51.461  |
| 2     | 4.704     | 4332672 | 377255 | 48.539  |
| Total |           | 8926178 | 759603 | 100.000 |

mAU

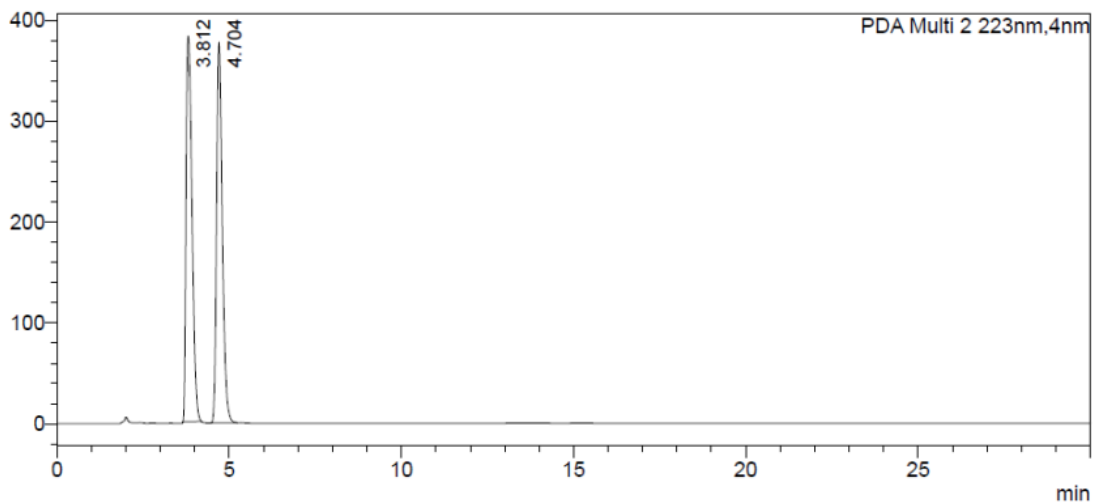

Scaemic: hw-7-155re-AD-1%-1.0

PDA Ch2 223nm

| Peak# | Ret. Time | Area    | Height | Area%   |
|-------|-----------|---------|--------|---------|
| 1     | 3.820     | 2340503 | 189498 | 72.400  |
| 2     | 4.716     | 892242  | 80246  | 27.600  |
| Total |           | 3232744 | 269744 | 100.000 |

mAU

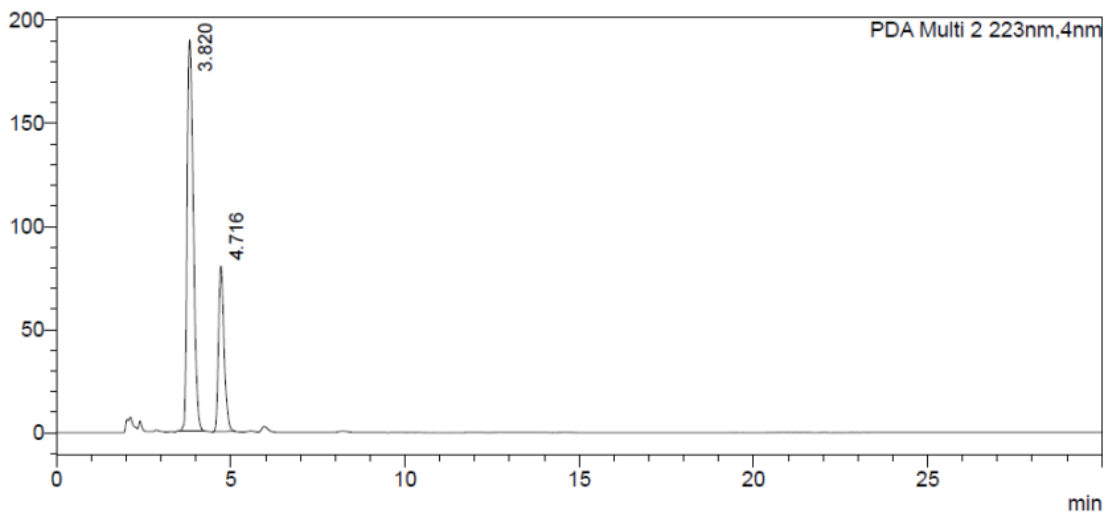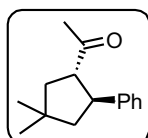

29

Racemic: hw-7-148-AD-0.3%-1.0

| PDA Ch2 220nm |           |        |        |         |
|---------------|-----------|--------|--------|---------|
| Peak#         | Ret. Time | Area   | Height | Area%   |
| 1             | 6.323     | 425444 | 29619  | 50.414  |
| 2             | 6.965     | 418455 | 27706  | 49.586  |
| Total         |           | 843899 | 57325  | 100.000 |

mAU

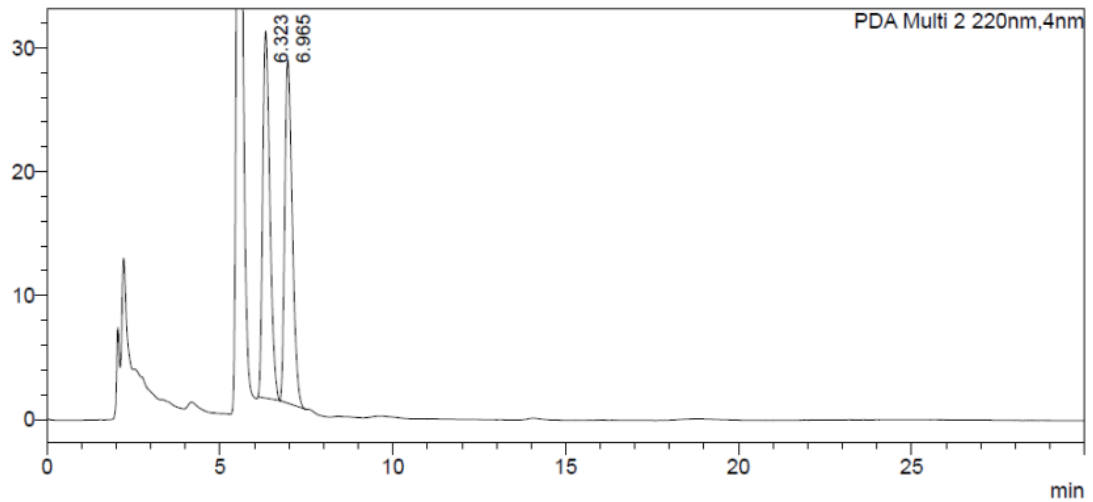

Scaemic: hw-7-147-AD-0.3%-1.0

| PDA Ch2 220nm |           |         |        |         |
|---------------|-----------|---------|--------|---------|
| Peak#         | Ret. Time | Area    | Height | Area%   |
| 1             | 6.188     | 1480824 | 100830 | 56.417  |
| 2             | 6.820     | 1143955 | 71174  | 43.583  |
| Total         |           | 2624779 | 172004 | 100.000 |

mAU

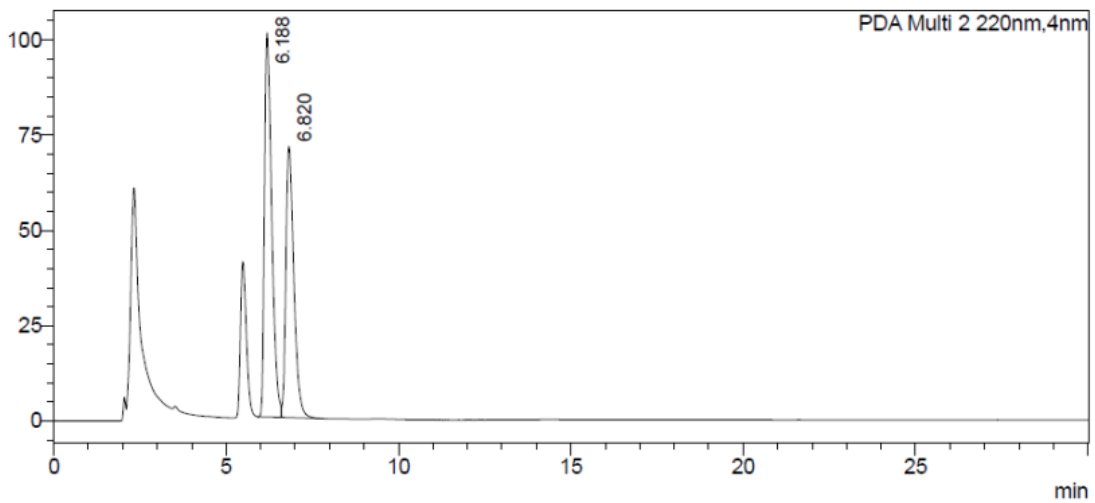

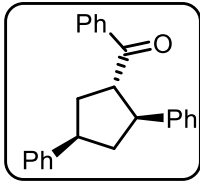

**30**

Racemic: hw-7-62-AD-1.0%-1.0

PDA Ch2 223nm

| Peak# | Ret. Time | Area     | Height | Area%   |
|-------|-----------|----------|--------|---------|
| 1     | 12.320    | 2358065  | 86400  | 12.466  |
| 2     | 13.441    | 7066400  | 220741 | 37.355  |
| 3     | 16.822    | 2425492  | 63380  | 12.822  |
| 4     | 25.484    | 7066751  | 103450 | 37.357  |
| Total |           | 18916708 | 473971 | 100.000 |

mAU

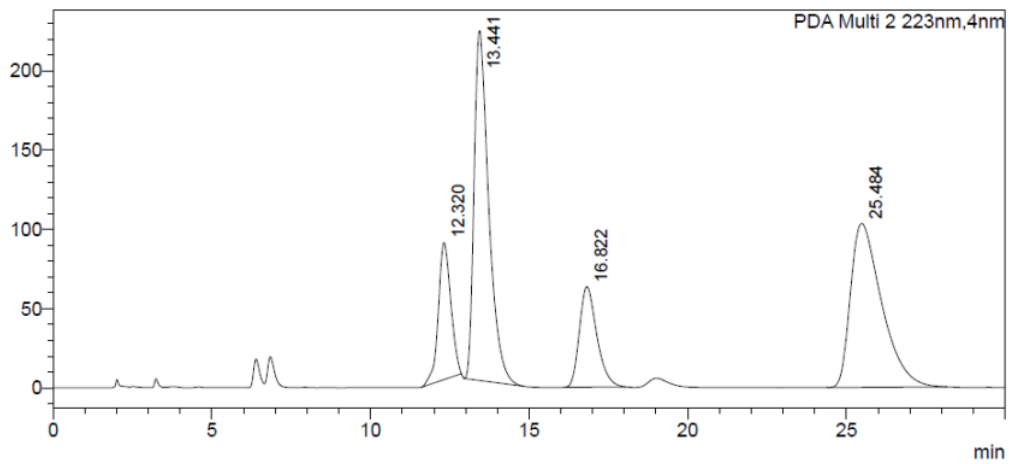

Scalemic: hw-7-177-2a-AD-1%-1.0

PDA Ch2 223nm

| Peak# | Ret. Time | Area    | Height | Area%   |
|-------|-----------|---------|--------|---------|
| 1     | 12.486    | 760984  | 27225  | 32.196  |
| 2     | 13.542    | 1411562 | 45079  | 59.721  |
| 3     | 17.044    | 28858   | 783    | 1.221   |
| 4     | 24.866    | 162187  | 2816   | 6.862   |
| Total |           | 2363592 | 75902  | 100.000 |

mAU

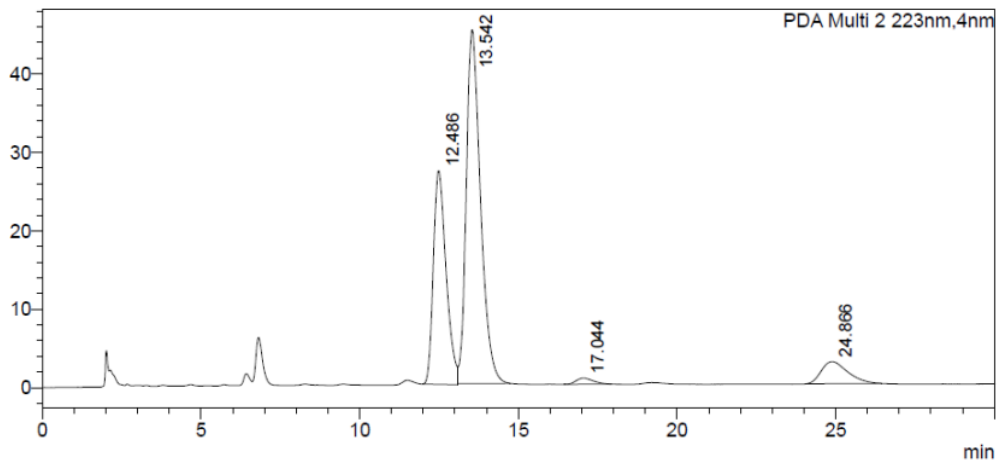

Supplement: Supplementary file 1 [file 10601836]
